# Supplementary material for: Suicide Information Database-Cymru: a protocol for a population-based, routinely collected data linkage study to explore risks and patterns of healthcare contact prior to suicide to identify opportunities for intervention
Source: PubMed Central journal article supplement — BMJ Open. 2014 Nov 25;4(11):e006780. doi: 10.1136/bmjopen-2014-006780 (PMC4248097; doi:10.1136/bmjopen-2014-006780), 2014-11-25
Supplement: bmjopen-2014-006780.draft_revisions.pdf [file bmjopen-2014-006780.draft_revisions.pdf]

# BMJ Open

**Suicide Information Database: A protocol for a population based, routinely collected data linkage case control study to explore risks and patterns of healthcare contact prior to suicide to identify opportunities for intervention.**

|                                 |                                                                                                                                                                                                                                                                                                                                                                                                                                                         |
|---------------------------------|---------------------------------------------------------------------------------------------------------------------------------------------------------------------------------------------------------------------------------------------------------------------------------------------------------------------------------------------------------------------------------------------------------------------------------------------------------|
| Journal:                        | <i>BMJ Open</i>                                                                                                                                                                                                                                                                                                                                                                                                                                         |
| Manuscript ID:                  | bmjopen-2014-006780                                                                                                                                                                                                                                                                                                                                                                                                                                     |
| Article Type:                   | Protocol                                                                                                                                                                                                                                                                                                                                                                                                                                                |
| Date Submitted by the Author:   | 29-Sep-2014                                                                                                                                                                                                                                                                                                                                                                                                                                             |
| Complete List of Authors:       | John, Ann; Swansea University, College of Medicine<br>Dennis, Mick; Swansea University, College of Medicine<br>Kosnes, Liv; Swansea University, College of Medicine<br>Gunnell, David; Bristol University, School of Social and Community Medicine<br>Scourfield, Jonathan; Cardiff University, School of Social Sciences<br>Ford, David; Swansea University, Health Information Research Unit<br>Lloyd, Keith; Swansea University, College of Medicine |
| <b>Primary Subject Heading</b>: | Public health                                                                                                                                                                                                                                                                                                                                                                                                                                           |
| Secondary Subject Heading:      | Epidemiology, General practice / Family practice, Health informatics, Mental health, Public health                                                                                                                                                                                                                                                                                                                                                      |
| Keywords:                       | Suicide & self-harm < PSYCHIATRY, PUBLIC HEALTH, EPIDEMIOLOGY, Health informatics < BIOTECHNOLOGY & BIOINFORMATICS                                                                                                                                                                                                                                                                                                                                      |
|                                 |                                                                                                                                                                                                                                                                                                                                                                                                                                                         |

SCHOLARONE™  
Manuscripts

1  
2  
3 **Suicide Information Database- Cymru: A protocol for a population based, routinely**  
4 **collected data linkage study to explore risks and patterns of healthcare contact prior to**  
5 **suicide to identify opportunities for intervention.**  
6  
7  
8

9  
10 John A<sup>1\*</sup>, Dennis M<sup>1</sup>, Kosnes L<sup>1</sup>, Gunnell D<sup>2</sup>, Scourfield J<sup>3</sup>, Ford DV<sup>1</sup>, Lloyd K<sup>1</sup>  
11

12  
13 <sup>1</sup>College of Medicine, Swansea University, Institute of Life Sciences 2, Singleton Park,  
14 Swansea, SA2 8PP, United Kingdom.  
15

16  
17  
18 <sup>2</sup>School of Social and Community Medicine, University of Bristol, Canynge Hall, 39  
19 Whatley Road, Bristol, BS8 2PS, United Kingdom.  
20

21  
22  
23 <sup>3</sup>School of Social Sciences, Cardiff University, Glamorgan Building, King Edward VII  
24 Avenue, Cardiff, CF10 3WT, United Kingdom.  
25  
26  
27

28  
29  
30  
31  
32 \*Corresponding Author: Ann John<sup>1\*</sup> [a.john@swansea.ac.uk](mailto:a.john@swansea.ac.uk); Phone: +44(0)1792 602568;  
33  
34 College of Medicine, Swansea University, Institute of Life Sciences 2, Singleton Park,  
35 Swansea, SA2 8PP, United Kingdom.  
36  
37

38  
39 Michael Dennis<sup>1</sup> [m.s.dennis@swansea.ac.uk](mailto:m.s.dennis@swansea.ac.uk), Liv Kosnes<sup>1</sup> [l.kosnes@swansea.ac.uk](mailto:l.kosnes@swansea.ac.uk), David  
40 Gunnell<sup>2</sup> [d.j.gunnell@bristol.ac.uk](mailto:d.j.gunnell@bristol.ac.uk), Jonathan Scourfield<sup>3</sup> [Scourfield@cardiff.ac.uk](mailto:Scourfield@cardiff.ac.uk), David V.  
41 Ford<sup>1</sup> [d.v.ford@swansea.ac.uk](mailto:d.v.ford@swansea.ac.uk), Keith Lloyd<sup>1</sup> [k.r.lloyd@swansea.ac.uk](mailto:k.r.lloyd@swansea.ac.uk)  
42  
43  
44  
45  
46

47 **Key words:** Suicide, case-control, database, routine data linkage.  
48

49  
50 **Word Count: 4054**  
51  
52  
53  
54  
55  
56  
57  
58  
59  
60

## Abstract

### Introduction

Prevention of suicide is a global public health challenge extending beyond mental health services. Linking routinely collected health and social care system data records, for the same individual across different services and over time has enormous potential in suicide research. Most previous research linking suicide mortality data with routinely collected electronic health records involves only one or two domains of health care provision such as psychiatric in-patient care. This protocol paper describes the development of a population based, routinely collected data linkage study: the Suicide Information Database (SID-Cymru). SID-Cymru aims to contribute to the information available on people who complete suicide.

### Methods and Analysis

SID-Cymru will facilitate a series of electronic case-control studies based in the Secure Anonymised Information Linkage (SAIL) Databank. We have identified 2664 cases of suicide in Wales between 2003 and 2011 from routinely collected mortality data using International Classification of Diseases, Tenth Revision, codes X60-84 (intentional self harm) and Y10-34 (undetermined intent). Each case will be matched by age and sex to at least five controls who are alive at the time of death of the case. Records will be collated and linked from routinely collected health and social data in Wales for each individual. Conditional logistic regression will be applied to produce crude and confounder (including general practice, socioeconomic status) adjusted odds ratios.

### Ethics and Dissemination

The SAIL Databank has the required ethical permissions in place to analyse anonymised data. Ethical approval has been granted by the Information Governance Review Panel (IGRP). The

1  
2  
3 improved understanding of the prior health, nature of previous contacts with services, and  
4  
5 wider social circumstances of those who complete suicide will assist in prevention policy,  
6  
7 service organisation and delivery. SID-Cymru is funded through the National Institute for  
8  
9 Social Care and Health Research, Welsh Government (RFS-12-14).  
10

### 11 12 13 **Article Summary**

#### 14 15 16 Article Focus:

- 17  
18 • Case definitions of probable and possible suicides
- 19  
20  
21 • Identifying risk factors and patterns of service use in those who complete suicide
- 22  
23  
24  
25 • Designing a study
- 26

#### 27 28 Key messages:

- 29  
30  
31 • SID-Cymru will facilitate a series of case- control studies of those who complete  
32  
33 suicide
- 34  
35  
36 • Recency of primary care, in- and out-patient hospital and emergency department  
37  
38 contacts including attendance for self-harm, primary care diagnosis of depression,  
39  
40 levels of treatment with anti-depressants and trends in such treatment over time, rural  
41  
42 and urban geography, educational attainment, contacts for the elderly and levels of  
43  
44 physical illness will be investigated
- 45  
46  
47 • Results will be adjusted for a number of confounders
- 48

#### 49 50 Strengths and Limitations of this study:

- 51  
52  
53 • Based on the general population
- 54  
55  
56 • Includes all deaths through suicide, not just those known to mental health services
- 57

- Based on routinely collected health and social care data linkage
- Linkage across multiple domains. Most suicide data linkage studies are limited to only one or two domains of health care provision.
- Prescriptions not actual use

For peer review only

## Introduction

Every year approximately 800,000 people die by suicide worldwide, one to two in every 100 deaths. Prevention of suicide is a global public health challenge. Collaborative working across government departments, with a public health approach extending beyond mental health service care is essential<sup>1</sup>. Global patterns and national trends in the incidence of suicide and its key risk factors change over time. The therapeutic and preventive challenges of understanding and responding to these changes are considerable.

Vast amounts of personal data are routinely collected on a daily basis by health and social care systems around the world to support clinical management and patient care. Linking these data records, for the same individuals across different services and over time, offers a powerful, population-wide resource. Such integrated datasets have been used to study a range of health issues to identify risk and protective factors and to examine outcomes. The secondary use of these data has enormous potential in suicide research. Improved consideration of the prior health, wider social circumstances and points of access to services of all individuals who complete suicide can be achieved.<sup>2-4</sup>

Studies from the Nordic countries, have demonstrated the usefulness of data-linkage across register based studies in suicide research.<sup>5-10</sup> Others<sup>11-13</sup> have demonstrated that collating and linking sets of routinely collected whole population based data, such as GP records, out-patient data, in-patient activity, with mortality data enable more detailed analysis of risk factors for those people completing suicide. Most previous research linking suicide mortality data with routinely collected electronic health records involves only one or two domains of health care provision such as psychiatric in-patient care.

1  
2  
3 In the United Kingdom various systems exist to examine suicide deaths. The National  
4 Confidential Inquiry into Suicide and Homicide (NCISH) by people with Mental Illness  
5 focuses on suicide cases that were in contact with mental health services (approximately 25%  
6 of total) in the year prior to their deaths.<sup>3</sup> However this provides limited information on  
7 issues of suicide in the general population and may hamper the effectiveness of wider  
8 preventive efforts.<sup>1</sup> In a recent report NCISH<sup>14</sup> examined aspects of primary healthcare prior  
9 to all suicides in England between 2002-2011; however no linkage was made with data from  
10 other service providers such as emergency departments.  
11  
12  
13  
14  
15  
16  
17  
18  
19

20  
21 Scotland has recently established enhanced data collection in relation to suicide, however,  
22 further development is needed in order for 'ScotSID' to be able to examine healthcare  
23 pathways and contact with more than one health service;<sup>15</sup> England does not currently have a  
24 dedicated repository for suicide data though studies have made use of the Clinical Practice  
25 Research Datalink (CPRD; [www.cprd.com](http://www.cprd.com)), which represents approximately 8.5% of the UK  
26 population from 600 General Practices (GP's) in England.<sup>16</sup> CPRD can be linked with data  
27 from the National Health Service (NHS) Hospital Episode Statistics (HES;  
28 <http://www.hscic.gov.uk>) and mortality data from the Office of National Statistics (ONS;  
29 <http://www.ons.gov.uk>) but has limited emergency department data.  
30  
31  
32  
33  
34  
35  
36  
37  
38  
39  
40  
41

42 SID-Cymru will access and link information on prior health, nature of previous contacts with  
43 services, and wider social circumstances of all those who complete suicide (known and  
44 unknown to mental health services) within the population of Wales via anonymised routinely  
45 collected electronic data held in healthcare and social datasets from the Secure Anonymised  
46 Information Linkage (SAIL) Databank ([www.saildatabank.com](http://www.saildatabank.com)).<sup>17 18</sup> This brings together,  
47 links and anonymises the widest possible range of person-based data currently available in  
48  
49  
50  
51  
52  
53  
54  
55  
56  
57  
58  
59  
60

1  
2  
3 the UK. The SAIL Databank was originally set up by the Health Information Research Unit  
4  
5 (HIRU) at the College of Medicine at Swansea University.  
6  
7

8  
9 SID-Cymru is part of the research programme related to the Health e-Research Collaboration  
10  
11 UK (HeRC UK), led by the Medical Research Council (MRC) and based in the Centre for the  
12  
13 Improvement of Population Health through e-Records Research (CIPHER). CIPHER is a UK  
14  
15 Clinical Research Collaboration (UKCRC) Public Health Research Centre of Excellence set  
16  
17 within the College of Medicine at Swansea University. SID-Cymru will provide timely robust  
18  
19 data to inform the future strategic direction of and the first step in designing and evaluating  
20  
21 effective interventions to prevent suicide. It will use the International Classification of  
22  
23 Disease, Tenth Revision,<sup>19</sup> (ICD-10) definitions and instructions for classifying causes of  
24  
25 death which will allow for comparisons with other countries and thus support research of  
26  
27 relevance globally. An emphasis will be given to issues where there are opportunities for  
28  
29 intervention or where electronic data linkage confers an advantage to its investigation.  
30  
31

### 32 33 **Aim**

34  
35  
36 The main aim is to establish a Suicide Information Database- Cymru as a population based  
37  
38 resource for studying factors and service contacts associated with all suicide deaths through  
39  
40 routinely collected data linkage case control studies.  
41  
42

### 43 44 **Objectives:**

#### 45 46 *Phase 1:*

- 47  
48  
49  
50  
51  
52  
53  
54  
55  
56  
57  
58  
59  
60  
61  
62  
63  
64  
65  
66  
67  
68  
69  
70  
71  
72  
73  
74  
75  
76  
77  
78  
79  
80  
81  
82  
83  
84  
85  
86  
87  
88  
89  
90  
91  
92  
93  
94  
95  
96  
97  
98  
99  
100  
101  
102  
103  
104  
105  
106  
107  
108  
109  
110  
111  
112  
113  
114  
115  
116  
117  
118  
119  
120  
121  
122  
123  
124  
125  
126  
127  
128  
129  
130  
131  
132  
133  
134  
135  
136  
137  
138  
139  
140  
141  
142  
143  
144  
145  
146  
147  
148  
149  
150  
151  
152  
153  
154  
155  
156  
157  
158  
159  
160  
161  
162  
163  
164  
165  
166  
167  
168  
169  
170  
171  
172  
173  
174  
175  
176  
177  
178  
179  
180  
181  
182  
183  
184  
185  
186  
187  
188  
189  
190  
191  
192  
193  
194  
195  
196  
197  
198  
199  
200  
201  
202  
203  
204  
205  
206  
207  
208  
209  
210  
211  
212  
213  
214  
215  
216  
217  
218  
219  
220  
221  
222  
223  
224  
225  
226  
227  
228  
229  
230  
231  
232  
233  
234  
235  
236  
237  
238  
239  
240  
241  
242  
243  
244  
245  
246  
247  
248  
249  
250  
251  
252  
253  
254  
255  
256  
257  
258  
259  
260  
261  
262  
263  
264  
265  
266  
267  
268  
269  
270  
271  
272  
273  
274  
275  
276  
277  
278  
279  
280  
281  
282  
283  
284  
285  
286  
287  
288  
289  
290  
291  
292  
293  
294  
295  
296  
297  
298  
299  
300  
301  
302  
303  
304  
305  
306  
307  
308  
309  
310  
311  
312  
313  
314  
315  
316  
317  
318  
319  
320  
321  
322  
323  
324  
325  
326  
327  
328  
329  
330  
331  
332  
333  
334  
335  
336  
337  
338  
339  
340  
341  
342  
343  
344  
345  
346  
347  
348  
349  
350  
351  
352  
353  
354  
355  
356  
357  
358  
359  
360  
361  
362  
363  
364  
365  
366  
367  
368  
369  
370  
371  
372  
373  
374  
375  
376  
377  
378  
379  
380  
381  
382  
383  
384  
385  
386  
387  
388  
389  
390  
391  
392  
393  
394  
395  
396  
397  
398  
399  
400  
401  
402  
403  
404  
405  
406  
407  
408  
409  
410  
411  
412  
413  
414  
415  
416  
417  
418  
419  
420  
421  
422  
423  
424  
425  
426  
427  
428  
429  
430  
431  
432  
433  
434  
435  
436  
437  
438  
439  
440  
441  
442  
443  
444  
445  
446  
447  
448  
449  
450  
451  
452  
453  
454  
455  
456  
457  
458  
459  
460  
461  
462  
463  
464  
465  
466  
467  
468  
469  
470  
471  
472  
473  
474  
475  
476  
477  
478  
479  
480  
481  
482  
483  
484  
485  
486  
487  
488  
489  
490  
491  
492  
493  
494  
495  
496  
497  
498  
499  
500  
501  
502  
503  
504  
505  
506  
507  
508  
509  
510  
511  
512  
513  
514  
515  
516  
517  
518  
519  
520  
521  
522  
523  
524  
525  
526  
527  
528  
529  
530  
531  
532  
533  
534  
535  
536  
537  
538  
539  
540  
541  
542  
543  
544  
545  
546  
547  
548  
549  
550  
551  
552  
553  
554  
555  
556  
557  
558  
559  
560  
561  
562  
563  
564  
565  
566  
567  
568  
569  
570  
571  
572  
573  
574  
575  
576  
577  
578  
579  
580  
581  
582  
583  
584  
585  
586  
587  
588  
589  
590  
591  
592  
593  
594  
595  
596  
597  
598  
599  
600  
601  
602  
603  
604  
605  
606  
607  
608  
609  
610  
611  
612  
613  
614  
615  
616  
617  
618  
619  
620  
621  
622  
623  
624  
625  
626  
627  
628  
629  
630  
631  
632  
633  
634  
635  
636  
637  
638  
639  
640  
641  
642  
643  
644  
645  
646  
647  
648  
649  
650  
651  
652  
653  
654  
655  
656  
657  
658  
659  
660  
661  
662  
663  
664  
665  
666  
667  
668  
669  
670  
671  
672  
673  
674  
675  
676  
677  
678  
679  
680  
681  
682  
683  
684  
685  
686  
687  
688  
689  
690  
691  
692  
693  
694  
695  
696  
697  
698  
699  
700  
701  
702  
703  
704  
705  
706  
707  
708  
709  
710  
711  
712  
713  
714  
715  
716  
717  
718  
719  
720  
721  
722  
723  
724  
725  
726  
727  
728  
729  
730  
731  
732  
733  
734  
735  
736  
737  
738  
739  
740  
741  
742  
743  
744  
745  
746  
747  
748  
749  
750  
751  
752  
753  
754  
755  
756  
757  
758  
759  
760  
761  
762  
763  
764  
765  
766  
767  
768  
769  
770  
771  
772  
773  
774  
775  
776  
777  
778  
779  
780  
781  
782  
783  
784  
785  
786  
787  
788  
789  
790  
791  
792  
793  
794  
795  
796  
797  
798  
799  
800  
801  
802  
803  
804  
805  
806  
807  
808  
809  
810  
811  
812  
813  
814  
815  
816  
817  
818  
819  
820  
821  
822  
823  
824  
825  
826  
827  
828  
829  
830  
831  
832  
833  
834  
835  
836  
837  
838  
839  
840  
841  
842  
843  
844  
845  
846  
847  
848  
849  
850  
851  
852  
853  
854  
855  
856  
857  
858  
859  
860  
861  
862  
863  
864  
865  
866  
867  
868  
869  
870  
871  
872  
873  
874  
875  
876  
877  
878  
879  
880  
881  
882  
883  
884  
885  
886  
887  
888  
889  
890  
891  
892  
893  
894  
895  
896  
897  
898  
899  
900  
901  
902  
903  
904  
905  
906  
907  
908  
909  
910  
911  
912  
913  
914  
915  
916  
917  
918  
919  
920  
921  
922  
923  
924  
925  
926  
927  
928  
929  
930  
931  
932  
933  
934  
935  
936  
937  
938  
939  
940  
941  
942  
943  
944  
945  
946  
947  
948  
949  
950  
951  
952  
953  
954  
955  
956  
957  
958  
959  
960  
961  
962  
963  
964  
965  
966  
967  
968  
969  
970  
971  
972  
973  
974  
975  
976  
977  
978  
979  
980  
981  
982  
983  
984  
985  
986  
987  
988  
989  
990  
991  
992  
993  
994  
995  
996  
997  
998  
999  
1000
  - 50  
51  
52  
53  
54  
55  
56  
57  
58  
59  
60  
61  
62  
63  
64  
65  
66  
67  
68  
69  
70  
71  
72  
73  
74  
75  
76  
77  
78  
79  
80  
81  
82  
83  
84  
85  
86  
87  
88  
89  
90  
91  
92  
93  
94  
95  
96  
97  
98  
99  
100  
101  
102  
103  
104  
105  
106  
107  
108  
109  
110  
111  
112  
113  
114  
115  
116  
117  
118  
119  
120  
121  
122  
123  
124  
125  
126  
127  
128  
129  
130  
131  
132  
133  
134  
135  
136  
137  
138  
139  
140  
141  
142  
143  
144  
145  
146  
147  
148  
149  
150  
151  
152  
153  
154  
155  
156  
157  
158  
159  
160  
161  
162  
163  
164  
165  
166  
167  
168  
169  
170  
171  
172  
173  
174  
175  
176  
177  
178  
179  
180  
181  
182  
183  
184  
185  
186  
187  
188  
189  
190  
191  
192  
193  
194  
195  
196  
197  
198  
199  
200  
201  
202  
203  
204  
205  
206  
207  
208  
209  
210  
211  
212  
213  
214  
215  
216  
217  
218  
219  
220  
221  
222  
223  
224  
225  
226  
227  
228  
229  
230  
231  
232  
233  
234  
235  
236  
237  
238  
239  
240  
241  
242  
243  
244  
245  
246  
247  
248  
249  
250  
251  
252  
253  
254  
255  
256  
257  
258  
259  
260  
261  
262  
263  
264  
265  
266  
267  
268  
269  
270  
271  
272  
273  
274  
275  
276  
277  
278  
279  
280  
281  
282  
283  
284  
285  
286  
287  
288  
289  
290  
291  
292  
293  
294  
295  
296  
297  
298  
299  
300  
301  
302  
303  
304  
305  
306  
307  
308  
309  
310  
311  
312  
313  
314  
315  
316  
317  
318  
319  
320  
321  
322  
323  
324  
325  
326  
327  
328  
329  
330  
331  
332  
333  
334  
335  
336  
337  
338  
339  
340  
341  
342  
343  
344  
345  
346  
347  
348  
349  
350  
351  
352  
353  
354  
355  
356  
357  
358  
359  
360  
361  
362  
363  
364  
365  
366  
367  
368  
369  
370  
371  
372  
373  
374  
375  
376  
377  
378  
379  
380  
381  
382  
383  
384  
385  
386  
387  
388  
389  
390  
391  
392  
393  
394  
395  
396  
397  
398  
399  
400  
401  
402  
403  
404  
405  
406  
407  
408  
409  
410  
411  
412  
413  
414  
415  
416  
417  
418  
419  
420  
421  
422  
423  
424  
425  
426  
427  
428  
429  
430  
431  
432  
433  
434  
435  
436  
437  
438  
439  
440  
441  
442  
443  
444  
445  
446  
447  
448  
449  
450  
451  
452  
453  
454  
455  
456  
457  
458  
459  
460  
461  
462  
463  
464  
465  
466  
467  
468  
469  
470  
471  
472  
473  
474  
475  
476  
477  
478  
479  
480  
481  
482  
483  
484  
485  
486  
487  
488  
489  
490  
491  
492  
493  
494  
495  
496  
497  
498  
499  
500  
501  
502  
503  
504  
505  
506  
507  
508  
509  
510  
511  
512  
513  
514  
515  
516  
517  
518  
519  
520  
521  
522  
523  
524  
525  
526  
527  
528  
529  
530  
531  
532  
533  
534  
535  
536  
537  
538  
539  
540  
541  
542  
543  
544  
545  
546  
547  
548  
549  
550  
551  
552  
553  
554  
555  
556  
557  
558  
559  
560  
561  
562  
563  
564  
565  
566  
567  
568  
569  
570  
571  
572  
573  
574  
575  
576  
577  
578  
579  
580  
581  
582  
583  
584  
585  
586  
587  
588  
589  
590  
591  
592  
593  
594  
595  
596  
597  
598  
599  
600  
601  
602  
603  
604  
605  
606  
607  
608  
609  
610  
611  
612  
613  
614  
615  
616  
617  
618  
619  
620  
621  
622  
623  
624  
625  
626  
627  
628  
629  
630  
631  
632  
633  
634  
635  
636  
637  
638  
639  
640  
641  
642  
643  
644  
645  
646  
647  
648  
649  
650  
651  
652  
653  
654  
655  
656  
657  
658  
659  
660  
661  
662  
663  
664  
665  
666  
667  
668  
669  
670  
671  
672  
673  
674  
675  
676  
677  
678  
679  
680  
681  
682  
683  
684  
685  
686  
687  
688  
689  
690  
691  
692  
693  
694  
695  
696  
697  
698  
699  
700  
701  
702  
703  
704  
705  
706  
707  
708  
709  
710  
711  
712  
713  
714  
715  
716  
717  
718  
719  
720  
721  
722  
723  
724  
725  
726  
727  
728  
729  
730  
731  
732  
733  
734  
735  
736  
737  
738  
739  
740  
741  
742  
743  
744  
745  
746  
747  
748  
749  
750  
751  
752  
753  
754  
755  
756  
757  
758  
759  
760  
761  
762  
763  
764  
765  
766  
767  
768  
769  
770  
771  
772  
773  
774  
775  
776  
777  
778  
779  
780  
781  
782  
783  
784  
785  
786  
787  
788  
789  
790  
791  
792  
793  
794  
795  
796  
797  
798  
799  
800  
801  
802  
803  
804  
805  
806  
807  
808  
809  
810  
811  
812  
813  
814  
815  
816  
817  
818  
819  
820  
821  
822  
823  
824  
825  
826  
827  
828  
829  
830  
831  
832  
833  
834  
835  
836  
837  
838  
839  
840  
841  
842  
843  
844  
845  
846  
847  
848  
849  
850  
851  
852  
853  
854  
855  
856  
857  
858  
859  
860  
861  
862  
863  
864  
865  
866  
867  
868  
869  
870  
871  
872  
873  
874  
875  
876  
877  
878  
879  
880  
881  
882  
883  
884  
885  
886  
887  
888  
889  
890  
891  
892  
893  
894  
895  
896  
897  
898  
899  
900  
901  
902  
903  
904  
905  
906  
907  
908  
909  
910  
911  
912  
913  
914  
915  
916  
917  
918  
919  
920  
921  
922  
923  
924  
925  
926  
927  
928  
929  
930  
931  
932  
933  
934  
935  
936  
937  
938  
939  
940  
941  
942  
943  
944  
945  
946  
947  
948  
949  
950  
951  
952  
953  
954  
955  
956  
957  
958  
959  
960  
961  
962  
963  
964  
965  
966  
967  
968  
969  
970  
971  
972  
973  
974  
975  
976  
977  
978  
979  
980  
981  
982  
983  
984  
985  
986  
987  
988  
989  
990  
991  
992  
993  
994  
995  
996  
997  
998  
999  
1000

- 1  
2  
3  
4  
5  
6  
7  
8  
9
- To explore and address the methodological issues relating to the development of this database of completed suicides and the linkage of data across different datasets and settings.

10  
11

*Phase 2:*

- 12  
13  
14  
15  
16  
17  
18  
19  
20  
21  
22  
23  
24  
25  
26
- To investigate risk factors and trends for suicide including: primary care diagnosis of depression; levels of treatment with anti-depressants and trends in such treatment over time; rural and urban geography; educational attainment; levels of physical illness.
  - To investigate settings and pathways of care where people are in contact with services in the year leading up to their suicide across the whole population and in specific groups such as the elderly.

27  
28

**Methods and Analyses**

29  
30  
31

*Design*

32  
33  
34  
35  
36  
37  
38  
39  
40  
41  
42  
43  
44

SID-Cymru will facilitate a series of electronic population based, routinely collected data linkage case-control studies on completed suicide in Wales between 2003 and 2011. Wales has a population of 3.1 million<sup>20</sup> and is part of the United Kingdom. There are approximately 32,000 deaths of Welsh nationals registered each year of which around 300 (approximately 1%) are registered as suicides.<sup>21</sup>

45  
46  
47

*Data Source*

48  
49  
50  
51  
52  
53  
54  
55  
56

SID-Cymru will be assembled within the SAIL Databank,<sup>17</sup> a growing resource that already holds over a billion anonymised records from 13 databases which can be anonymously linked at the individual record level.<sup>18</sup> The SAIL Databank has been previously used for linkage of routine data.<sup>22-26</sup>

1  
2  
3 Within the SAIL Databank a split-file approach to anonymisation is used to overcome issues  
4 of confidentiality and disclosure in health-related data warehousing.<sup>18</sup> Demographic data are  
5 sent to a partner organisation, NHS Wales Information Service (NWIS), where all identifiable  
6 information is removed; clinical data are sent directly to HIRU, where, for each dataset  
7 within the SAIL Databank, an individual is assigned an encrypted Anonymised Linking Field  
8 (ALF). The ALF is used to link anonymised individuals across datasets, thus supporting the  
9 opportunity to conduct longitudinal analyses of an individual's journey through multiple  
10 health, education and social datasets.<sup>17</sup> Additionally Residential Anonymised Linking Fields  
11 (RALFs) have been created for all residences in Wales and enables linkage of anonymised  
12 household and environment data with the health records of individual residents without the  
13 identity of the residences or residents being known to researchers.<sup>26</sup>

14  
15  
16  
17  
18  
19  
20  
21  
22  
23  
24  
25  
26  
27  
28 *The primary study base* will be the Welsh Demographic Service<sup>27</sup> (WDS) hosted within the  
29 SAIL Databank. The WDS is a core dataset available within the SAIL Databank and part of a  
30 set of services to manage administrative information (demographic data) for NHS patients in  
31 Wales. The WDS was introduced early in 2009 replacing a similar service known as the NHS  
32 Wales Administrative Register (NHS AR). The WDS data is collected from GP practices via  
33 the Exeter System and more than five million individuals are currently present in the WDS  
34 dataset within the SAIL Databank. The WDS is a register of all individuals that have at some  
35 point in time been registered with a Welsh General Practitioner (GP) or required some form  
36 of NHS health care provision in Wales. The electronic collation of WDS / NHS AR data  
37 originated in 1960 and is updated and maintained by NWIS,<sup>27</sup> ensuring that address changes  
38 (within and out of Wales) and death notices are included in the register. The original (non-  
39 anonymised) version of the NHS AR has been used in the HIRU Matching Algorithm for  
40 Consistent Results in Anonymised Linkage (MACRAL), making the WDS / NHS AR the  
41  
42  
43  
44  
45  
46  
47  
48  
49  
50  
51  
52  
53  
54  
55  
56  
57  
58  
59  
60

1  
2  
3 master list for all Welsh residents and using probabilistic matching to find the associated  
4  
5 NHS numbers that are then encrypted into ALF's.  
6  
7

8 Deaths in Wales should be registered within five days of the date of death. However  
9  
10 legislation in Wales means that when a coroner's inquest takes place, the death cannot be  
11  
12 registered until the inquest is complete. Since the Office for National Statistics (ONS), the  
13  
14 national agency where all deaths are collated, has no conclusive information about the death  
15  
16 until it is registered, there is a delay between the date the death occurred and when the death  
17  
18 is added to the annual ONS mortality dataset. The ONS found that less than 41% of deaths  
19  
20 going to inquest were registered within 3 months, though 96% were registered within 1  
21  
22 year.<sup>28</sup> Thus precise information on the annual incidence of suicide may be delayed by up to  
23  
24 two years. Information collected at death registration is recorded on the Registration Online  
25  
26 system by registrars. Most of the information is normally supplied by the informant (usually a  
27  
28 close relative of the deceased) while the cause of death (COD) is usually obtained from the  
29  
30 Medical Certificate of Cause of Death (MCCD) completed by a medical practitioner when  
31  
32 the death is certified using ICD-10 coding or the coroner if there is an inquest.<sup>19</sup> Notably, a  
33  
34 death is not officially registered within the Annual District Deaths Extract (ADDE) until the  
35  
36 COD has been finalised, and thus the year of death and the year of registration may not  
37  
38 concur. The *primary dataset* used to construct SID-Cymru is the ADDE from the ONS. The  
39  
40 ADDE is inclusive of Welsh residents who died outside of Wales, and holds information  
41  
42 about COD derived from death certificates on all deaths in Wales.  
43  
44  
45  
46  
47  
48

#### 49 *Definition of Suicide for Cases*

50  
51

52 The true number of suicides is difficult to determine because a coroner's conclusion of  
53  
54 suicide must be 'beyond a reasonable doubt' i.e. that the death was intentionally self inflicted  
55  
56 and in some areas coroners have increasingly (since 2001) reported narrative conclusions  
57  
58

1  
2  
3 rather than reporting it as suicide.<sup>29 30</sup> Previously when insufficient information was recorded  
4  
5 by the coroner ONS coders used to record the death as an accident which inevitably led to  
6  
7 some suicides being classified as accidents or misadventure. The ONS has recently issued  
8  
9 guidance on this issue following a coding practice review.<sup>31</sup> Current ONS practice includes  
10  
11 deaths where intention is ‘undetermined whether accidentally or purposefully inflicted’; thus  
12  
13 deaths where there may be no intention to take life, such as in relation to injury or poisoning,  
14  
15 are included in suicide figures by ONS. Currently there is no access to coroners’ narrative  
16  
17 verdicts within the SAIL Databank as a possible method for review of case inclusion.  
18  
19

20  
21  
22 There is evidence to suggest that a high proportion of deaths from poisoning and hanging that  
23  
24 receive accidental verdicts, are found, when subjected to clinical review, to be suicides.<sup>32</sup>  
25  
26 Such possible deaths through suicide will be included in SID-Cymru as an opportunity for  
27  
28 further separate and combined analysis; thus the additional ICD-10 codes relating to  
29  
30 ‘accidental poisoning with prescribed drugs’ (X40-X41, X43-X49) and ‘accidental hanging’  
31  
32 (W75-W76) may be used along with ‘sequelae of external causes of morbidity and mortality’  
33  
34 (Y87, Y87.2, Y89, Y89.9).<sup>18</sup> Thus with SID-Cymru we aim to establish a Suicide  
35  
36 Information Database that can be a resource for studying factors associated with *all*  
37  
38 probable, as well as, possible deaths through suicide; by including accidental  
39  
40 hanging/strangulation and accidental poisoning, excluding, narcotics and psychodysleptics  
41  
42 (i.e., possible suicides), along with the ONS traditional method of defining suicides, which  
43  
44 includes suicides and deaths of undetermined intent (probable suicides).<sup>2</sup>  
45  
46  
47

#### 48 49 *Identification of Cases and Controls*

50  
51  
52 SID-Cymru cases encompass suicides (‘intentional self-harm’ [ICD-10: X60-84]) and  
53  
54 probable deaths through suicide (‘undetermined intent’ [ICD-10: Y10-34, excl.Y33.9])  
55  
56 recorded from the MCCD and presented within ADDE as the underlying COD. Those coded  
57  
58  
59  
60

1  
2  
3 Y33.9/U50.9 (pending verdicts) are excluded since a large proportion of these are  
4  
5 subsequently found to be homicides. Probable suicide defined above can be supplemented  
6  
7 with possible deaths through suicide if required. Cases of probable suicide will be identified  
8  
9 and extracted by use of the ICD-10 codes<sup>19</sup> defined above and depicted in Table 1.  
10  
11

12  
13 ONS figures include those over 15 years of age only, due to the possibility that deaths in  
14  
15 younger children coded as undetermined events may be caused by unverifiable accidents,  
16  
17 neglect or abuse.<sup>33</sup> SID-Cymru will allow for the analysis of suicides and probable suicides  
18  
19 for the 10 to 14 year age band. Official ONS mortality statistics are produced based on the  
20  
21 number of deaths registered in a particular calendar year, rather than the number of deaths  
22  
23 that occurred in that year. This means their figures include some deaths that occurred in years  
24  
25 prior to the reference year (approximately 4%). As SID-Cymru will link and review data in  
26  
27 the period leading up to death it is important to ensure the match/end date reflects the correct  
28  
29 time period (specific to each individual case), i.e. date of death not date of registration, to  
30  
31 afford an accurate perspective on utilisation of resources and help seeking behaviours.  
32  
33 Consequently the actual date of death (ADOD) will be used in the matching criteria to  
34  
35 establish a data review 'end date' for controls, rather than the registered date of death  
36  
37 (RDOD) referred to in ONS reports. Mortality data within the SAIL Databank is only  
38  
39 available from 2003, thus the earliest case inclusion relates to ADOD's from the 1st January  
40  
41 2003. To minimise the underestimation of cases identified (i.e., due to delays in COD  
42  
43 confirmation and registration of DOD) the case inclusion for SID-Cymru includes cases aged  
44  
45 10 years and over at ADOD, where the ADOD took place between 01/01/2003 and 31/12/  
46  
47 2011.  
48  
49  
50  
51  
52  
53  
54  
55  
56  
57  
58  
59  
60

**Table 1.** ICD-10 codes used to identify and extract cases with death through probable suicide for SID-Cymru.

| Short name                            | Description                                                                                        | ICD10 codes                   |
|---------------------------------------|----------------------------------------------------------------------------------------------------|-------------------------------|
| Poisoning                             | Poisoning by and exposure to one or more types of poisons                                          | X60-X69, Y10-Y19              |
| Hanging & suffocation                 | Hanging, strangulation and suffocation                                                             | X70, Y20                      |
| Drowning                              | Drowning and submersion                                                                            | X71, Y21                      |
| Guns                                  | Firearm discharge                                                                                  | X72-X74, Y22-Y24              |
| Sharp object                          | Sharp object                                                                                       | X78, Y28                      |
| Jumping from a high place             | Jumping from a high place                                                                          | X80, Y30                      |
| Jumping or lying before moving object | Jumping or lying before moving object                                                              | X81, Y31                      |
| Explosives & Fire                     | Explosive material, smoke, fire, flames and hot objects                                            | X75-X77, Y25-Y27              |
| Other or unspecified events           | Intentional self-harm by other/un- specified means; Other/un- specified events undetermined intent | X83-X84, Y33-Y34 (excl.Y33.9) |
| Crash by motor vehicle                | Crashing of motor vehicle intentional and undetermined intent                                      | X82, Y32                      |
| Blunt Object                          | Blunt Object                                                                                       | X79, Y29                      |

Table 2 presents the number of registered deaths through suicide per year and actual deaths per year between 2003 and 2011 as reported by the ONS and as identified for SID-Cymru within the SAIL Databank.

**Table 2.** Probable Suicide<sup>1</sup> Deaths for Wales 2003 – 2011 identified within the SAIL Databank for SID-Cymru.

| Count by Year <sup>2</sup>                                       | 2003 | 2004 | 2005 | 2006 | 2007 | 2008 | 2009 | 2010 | 2011 | TOTAL       |
|------------------------------------------------------------------|------|------|------|------|------|------|------|------|------|-------------|
| <b>Probable Suicides ADOD<sup>3</sup> within SID<sup>4</sup></b> | 361  | 303  | 287  | 278  | 279  | 282  | 272  | 292  | 304  | <b>2664</b> |
| <b>Probable Suicides RDOD<sup>5</sup> within SID</b>             | 274  | 330  | 270  | 300  | 288  | 266  | 257  | 287  | 340  | <b>2612</b> |
| <b>ONS Probable Suicides<sup>6</sup> RDOD</b>                    | 332  | 330  | 269  | 300  | 289  | 266  | 258  | 288  | 341  | <b>2673</b> |

<sup>1</sup>Probable suicides = ICD-10 codes for Intentional [X60-84], Undetermined [Y10-34 excl. Y33.9] self-harm;

<sup>2</sup>Values are number of individuals unless otherwise indicated <sup>3</sup>ADOD = Year death occurred; <sup>4</sup>Cases identified for SID-Cymru includes those aged 10 years and over; <sup>5</sup>RDOD = Year death was registered; <sup>6</sup>Cases reported by the ONS include those aged 15 years and over.

*Matched Controls* will be identified within the WDS as live individuals matched on age (to the nearest year) and gender who were registered within the WDS for at least one year prior to matched case's ADOD. The controls will be required to be alive at the time of the matched case's ADOD (i.e., the match/end date). The use of live controls limits the introduction of bias relating to deaths, particularly in the younger age groups, of those undertaking risky behaviours resulting in premature death (e.g. substance use, accidents) that may be associated with unrecognised suicidal behaviours or known risk factors. To add to the power of the study we aim to identify at least five controls to every one case.<sup>34</sup>

### *Routine Data Sources*

For SID-Cymru the data collected on identified cases and controls, via ADDE and the WDS respectively, will be linked to other routinely collected datasets, retrospectively allowing a review of each individual's pathway through the various services. Linkage with, for example, GP system data provides varying information about patients going back several years, including previous diagnosis, presenting symptoms and previous medications prescribed. This dataset can be used to review contacts with the GP and, consequently, infer the development / diagnosis of any new medical conditions including depression and self harm prior to suicide. Linkage with in-patient data will allow a review of hospital contacts and Emergency Department datasets will give information on crisis contacts. This will provide comprehensive insights into help seeking behaviours and management across settings. Data sets currently accessible via the SAIL Databank which will be linked to SID-Cymru are presented in Table 3. There are several other datasets currently under negotiation for inclusion within the SAIL Databank to which, in the future, SID-Cymru could link. These include Department of Work and Pensions (DWP) employment and incapacity status, Looked After Children, fostering, Substance Misuse Services, Sexually Transmitted Infections and Police Data.

**Table 3.** Datasets available within the SAIL Databank for linkage with SID-Cymru cases and controls.

| Dataset                                   | Data Description                                                                                                                                                                                                                                                                                       | Data Provider                                                                        | Data Type                              | Geographical Coverage | Available from |
|-------------------------------------------|--------------------------------------------------------------------------------------------------------------------------------------------------------------------------------------------------------------------------------------------------------------------------------------------------------|--------------------------------------------------------------------------------------|----------------------------------------|-----------------------|----------------|
| Annual District Death Extract (ADDE)      | Register of all deaths relating to Welsh residents, including those that died out of Wales.                                                                                                                                                                                                            | NHS Wales' Informatics Service (NWIS)/ Health Solutions Wales (HSW) on behalf of ONS | Registry data                          | Wales                 | 2003           |
| Welsh Demographic Service (WDS)           | Administrative information about individuals in Wales that use NHS services; such as address and practice registration history. It replaced the NHS Wales Administrative Register (NHSAR) in 2009.                                                                                                     | NHS Wales' Informatics Service (NWIS)/ HSW                                           | Administrative (mandatory) data return | Wales                 | 1990           |
| Area Based Deprivation Scores             | Lower Super Output Area - Townsend Deprivation Index and Welsh Index of Multiple Deprivation Scores.                                                                                                                                                                                                   | NHS Wales' Informatics Service (NWIS)/ HSW                                           | Administrative data                    | Wales                 | 2001 / 2005    |
| Education Attainment (DCEL)               | Educational attainment at key stages (pre 16 year old). Data collated from school census, the national pupil survey and educational attainment databases by the Welsh Government.                                                                                                                      | Department for Children, Education, Lifelong Learning and Skills (DCELLS)            | Administrative / survey data.          | Wales                 | 2005           |
| Primary Care GP dataset                   | Each GP practice uses a clinical information system to maintain an electronic health record for each of their patients; capturing the signs, symptoms, test results, diagnoses, prescribed treatment, referrals for specialist treatment and social aspects relating to the patients home environment. | Welsh General Practices that have signed up to the SAIL Databank                     | Clinical system data                   | Wales                 | 2000           |
| Patient Episode Database for Wales (PEDW) | NHS Wales - hospital admissions (Inpatients and day cases) dataset comprising of attendance and clinical information for all hospital admissions: includes diagnoses and operations performed.                                                                                                         | NHS Wales' Informatics Service (NWIS)/ Health Solutions Wales (HSW)                  | Administrative (mandatory) data return | Wales                 | 1997           |
| Outpatient Dataset (OPD)                  | Attendance information for all NHS Wales hospital outpatient appointments.                                                                                                                                                                                                                             | NHS Wales' Informatics Service (NWIS)/ Health Solutions Wales (HSW)                  | Administrative (mandatory) data return | Wales                 | 2004           |
| Emergency Department Data Set (EDDS)      | Administrative and clinical information for all NHS Wales Accident and Emergency department attendances. Includes the All Wales Injury Surveillance Systems (AWISS) dataset                                                                                                                            | NHS Wales' Informatics Service (NWIS)/ Health Solutions Wales (HSW)                  | Administrative (mandatory) data return | Wales                 | 2009           |

## Measurements

### *Data Variables/Characteristics*

Data to be included in SID-Cymru will be extracted from the SAIL Databank and will include basic demographics; educational data; ADOD and RDOD; numbers and percentages for deprivation; proportions known to different healthcare settings in the period prior to death; inclusive medical history, i.e., primary care contact and diagnosis (by Read Codes), information about hospital / psychiatric admission and diagnosis (by ICD-10 Codes), and nature of service contact e.g. for self-harm, substance misuse. Therefore, the routinely collected data held by the NHS and other public bodies supplying the existing SAIL Databank will maximise the narrative of a death through suicide while being less resource intensive than psychological autopsies. The initial variables to be extracted and linked across data sets are described in Table 4.

## Planned Analyses

The primary objective is to establish SID-Cymru as a resource for future analysis. It is important to maximise the utility of the resource, and some general principles of analysis have been determined.

## Descriptive Epidemiology

### *Phase 1:*

- Identification and description of Cases: Number of deaths registered with ONS and available within the SAIL Databank, with relevant ICD-10 codes defined as suicides, between 2003-2011.

**Table 4.** Characteristics to be identified and collected through data linkage for SID-Cymru Cases and Controls.

| <b>Data</b>            | <b>Characteristics</b>       |
|------------------------|------------------------------|
| <b>Demographics</b>    | Sex                          |
|                        | Date of Birth                |
|                        | Marital status*              |
|                        | Employment*                  |
|                        | Education*                   |
| <b>Mortality</b>       | Date of Death,               |
|                        | Age at DOD (in years)        |
|                        | Registered Date of Death     |
|                        | Cause of Death (ICD-10 code) |
| <b>Deprivation</b>     | LSOA                         |
|                        | WIMD                         |
|                        | Townsend                     |
|                        | Rural-Urban Indicators       |
| <b>Medical History</b> | GP register*                 |
|                        | GP diagnosis (Read code)*    |
|                        | GP events*                   |
|                        | Hospital attendance          |
|                        | Hospital diagnosis           |
|                        | Hospital events              |
|                        | Outpatient attendance        |
|                        | Outpatient diagnosis*        |
|                        | Outpatient events            |
|                        | ED attendance*               |
|                        | ED diagnosis*                |
| ED events*             |                              |
| Psychiatric Admission* |                              |

\* Where data are available; there may be limitations to the number of cases with this information.

- Identification and description of Matched Controls.
- Basic demographics.
- Table of delay (days) in registering suicides and undetermined deaths.

*Phase 2:*

- Proportions known to different healthcare settings: number and percentages, with main diagnosis, that had a general hospital admission; emergency department contact for self-harm and other indications; psychiatric admission and primary care contact in the year prior to probable suicide.
- Numbers and percentages for deprivation, employment status, educational achievement and medical history (e.g., chronic pain, terminal illness, medication, previous self harm, and substance misuse) will also be sought.
- Number of cases with missing data across data sets for variables of interest will be noted.

**Area based measures of socio-economic deprivation**

Deprivation will be measured at Lower Super Output Area (LSOA) level using the Welsh Index of Multiple Deprivation<sup>35</sup> (WIMD) and Townsend Index Score.<sup>36</sup> All suicides and matched controls will be assigned to a lower layer super output area (LSOA). There are 1909 LSOAs in Wales with an average population of 1500 people (range: 1000-3000).<sup>37</sup> Linkage to WIMD and Townsend Index information is available in the SAIL Databank. These will be ranked for deprivation, divided into quintiles and standardised rates calculated.

**Odds ratios for the described exposures in the case control study**

1  
2  
3 A case-control study utilising SID-Cymru will be population based and so the relative risk of  
4  
5 suicide will be estimated by conditional logistic regression model with SPSS (version 20).  
6  
7 Crude odds ratios will be adjusted for general practice and/or LSOA by matching cases and  
8  
9 controls. Unadjusted estimates, confounder-adjusted estimates and their precision (e.g., 95%  
10  
11 confidence interval) will be produced. Interactions between variables will be assessed with  
12  
13 the log likelihood ratio test based on results from the adjusted analysis. The population  
14  
15 attributable risk will be calculated<sup>38</sup> on the basis of adjusted relative risks from the full  
16  
17 analysis and the distribution of exposures in the cases.  
18  
19

20  
21 We will also report information on the completeness of linkage with each dataset.  
22  
23

## 24 **Ethics and Dissemination**

### 25 *Ethics*

26  
27  
28 A large amount of preliminary work on anonymisation methodologies was undertaken to  
29  
30 create the SAIL Databank system,<sup>17- 18</sup> and the SAIL Databank has the required ethical  
31  
32 permissions and processes in place to analyse anonymised data. It operates within a robust  
33  
34 series of guidelines in line with the Caldicott principles and the National Information  
35  
36 Governance Board for Health and Social Care.<sup>18</sup> Ethical approval has been granted for SID-  
37  
38 Cymru from HIRU's Information Governance Review Panel (IGRP), an independent body  
39  
40 consisting of a range of government, regulatory and professional agencies. In compliance  
41  
42 with the IGRP rulings and the Data Protection Act 1998<sup>39</sup> individual level data and personal  
43  
44 identifier linkage codes will not be removed from the SAIL Databank and all analyses will be  
45  
46 carried out within the SAIL Databank gateway at Swansea University, a secure access point  
47  
48 to data within the SAIL Databank. The key points of the MRC/Wellcome Trust data sharing  
49  
50 policy will be followed.<sup>40 41</sup>  
51  
52  
53  
54  
55  
56  
57  
58  
59  
60

1  
2  
3 This paper describes the protocol for the development of a Suicide Information Database  
4 (SID-Cymru), and the research opportunities available from an electronic case-control study  
5 of suicides within a whole population. SID-Cymru will have the ability to link suicide cases  
6 anonymously to primary and secondary health information along with other social care data,  
7 allowing us to review each case's journey through these datasets. The establishment of SID-  
8 Cymru and exploration of the linkage methodologies will improve our understanding of those  
9 who complete suicide (particularly those not known to mental health services) and will be  
10 used to inform service planning and policy decision making and implementation. It will help  
11 identify key opportunities and settings for prevention of this tragic event. By so doing, SID-  
12 Cymru will join other international databases of suicide research and provide a platform for  
13 further investigation and data linkages.  
14  
15  
16  
17  
18  
19  
20  
21  
22  
23  
24  
25  
26

27 In order for SID-Cymru to become a functional resource it is important to be aware of the  
28 limits of health data available; though widely used in research, and offering a broad range of  
29 information about treatment and associated conditions, there are issues relating to  
30 determining the quality of patient records, the completeness of data available and any  
31 conclusions that may be drawn from them, perhaps particularly concerning primary care  
32 records.<sup>42</sup> That is, working with routinely collected data presented in its "raw" format  
33 requires a certain level of database analysis skills where duplicates, missing and erroneous  
34 entries are common occurrences. Whilst some such administrative / system-based recording  
35 issues are easy to identify and account for in individual datasets, it is not always apparent  
36 what is correct and what is erroneous at the combined level. Indeed, this problem is  
37 confounded when linkage of data reveals conflicting information causing routine data to  
38 appear inaccessible and attempts at linkage discouraged. Thus, a secondary aim for SID-  
39 Cymru is to share the skills developed as part of establishing a suicide database, which can  
40  
41  
42  
43  
44  
45  
46  
47  
48  
49  
50  
51  
52  
53  
54  
55  
56  
57  
58  
59  
60

1  
2  
3 aid colleagues who may lack such analytical expertise and foster greater multi-disciplinary  
4  
5 collaborations and advance suicide research.  
6  
7

8 The UK has a strong presence in form of a wide range of publications and expertise relating  
9  
10 to suicide research. Successful and dedicated Suicide Research Centres exist in Bristol,  
11  
12 Manchester and Oxford,<sup>43-45</sup> and Scotland recently commenced work on a Scottish Suicide  
13  
14 Information Database ('ScotSID').<sup>46</sup> These centres of excellence report broadly about suicide,  
15  
16 though for logistical reasons, often a regional focus is retained, relating to project funding,  
17  
18 analytical and interventional work; for that reason the establishment of a Suicide Information  
19  
20 Database in Wales will build on and enhance existing UK suicide resources and infrastructure  
21  
22 since the level of linkage available within the SAIL Databank is unique in this field. Unique  
23  
24 opportunities within the SAIL Databank include linkage across primary, secondary and  
25  
26 emergency department data and with education data.  
27  
28  
29

### 30 31 **Implications and Significance** 32

33  
34 Valuable opportunities exist for a wide range of epidemiological and clinical studies on  
35  
36 suicide in Wales and SID-Cymru has the potential to become an important resource in  
37  
38 facilitating such research which will be of relevance internationally. In addition to the records  
39  
40 that have already been included for linkage with SID-Cymru it is expected that over time  
41  
42 relevant information from other data sources (e.g. the DWP) will be linked to SID-Cymru to  
43  
44 provide a wider range of information on issues such as individuals' circumstances, the nature  
45  
46 of their deaths, and their contact with extended services. Additionally, linkage can be made  
47  
48 with non-routinely collected datasets such as that held by NCISH. Specific hypotheses that  
49  
50 will be explored include: recency of primary care, hospital and emergency department  
51  
52 contacts including attendance for self-harm, primary care diagnosis of depression, levels of  
53  
54  
55  
56  
57  
58  
59  
60

1  
2  
3 treatment with anti-depressants and trends in such treatment over time, rural and urban  
4  
5 geography, contacts for the elderly and levels of physical illness.  
6

7 Findings of current and projected public health importance will be assessed and presented to  
8  
9 support policy makers, commissioners and providers of health and social care in Wales. Non-  
10  
11 identifiable information from this project will be made available to researchers in Wales, the  
12  
13 UK and international collaborators. The initial project focus will be on identification of cases  
14  
15 and controls, data linkage opportunities and methodological issues relating to the  
16  
17 establishment of a Suicide Information Database and routine data linkage (Phase 1), before  
18  
19 commencing data extraction and analysis (Phase 2). The proposed data collation and linkage  
20  
21 of primary, secondary and emergency department health information together with  
22  
23 educational data are currently unique in the United Kingdom. Due to existing routine data  
24  
25 linkages within the SAIL Databank<sup>17</sup> it is possible to develop a central repository for  
26  
27 information relating to suicide in whole population that will be of relevance internationally.  
28  
29 This paper describes the design and development of a Suicide Information Database in its  
30  
31 infancy.  
32  
33  
34  
35

### 36 37 **Authors' contributions**

38  
39  
40 AJ, the principal investigator, was responsible for the conceptualization of SID-Cymru. AJ,  
41  
42 KL, MD, DG, JS for the design of SID-Cymru; AJ and LK for its on-going  
43  
44 operationalisation. AJ and LK drafted the manuscript. All authors read and approved the final  
45  
46 manuscript.  
47

### 48 49 **Funding Statement**

1  
2  
3 This study was funded by a grant from the National Institute for Social Care and Health  
4  
5 Research, Welsh Government, grant number RFS-12-14. DG is a National Institute for  
6  
7 Health Research (England) Senior Investigator.  
8  
9

### 10 **Competing interests**

11  
12 The authors declare that they have no competing interests.  
13  
14

### 15 **Ethics approval**

16  
17 Ethical approval has been granted by the Health Information Research Unit Information  
18  
19 Governance Review Panel at the College of Medicine at Swansea University.  
20  
21  
22  
23

### 24 **Data sharing statement**

25  
26 It will be possible to access the data after the publication of the results. Researchers interested  
27  
28 in collaborations or further information are invited to contact AJ at a.john@swansea.ac.uk.  
29  
30  
31

### 32 **References**

- 33  
34  
35  
36 1. World Health Organisation. 66th World Health Assembly. Draft comprehensive  
37  
38 mental health action plan 2013-2020. A66/10 Rev.1, WHO 16 May 2013.  
39  
40 [http://apps.who.int/gb/e/e\\_wha66.html](http://apps.who.int/gb/e/e_wha66.html) Accessed September 2014.  
41  
42  
43 2. Linsley KR, Schapira K, Kelly TP. Open verdict v. suicide—importance to research.  
44  
45 *Br J Psychiatry* 2001, **178**:465-468.  
46  
47  
48 3. Appleby L, Kapur N, Shaw J, *et al*. Annual Report: England, Northern Ireland,  
49  
50 Scotland and Wales. Manchester: University of Manchester 2013.  
51  
52 [http://www.bbmh.manchester.ac.uk/cmhr/centreforsuicideprevention/nci/reports/Ann](http://www.bbmh.manchester.ac.uk/cmhr/centreforsuicideprevention/nci/reports/AnnualReport2013_UK.pdf)  
53  
54 [ualReport2013\\_UK.pdf](http://www.bbmh.manchester.ac.uk/cmhr/centreforsuicideprevention/nci/reports/AnnualReport2013_UK.pdf) Accessed July 2014.  
55  
56  
57  
58  
59  
60

- 1  
2  
3 4. Andersen UA, Andersen M, Rosholm JU, *et al.* Contacts to the health care system  
4  
5 prior to suicide: a comprehensive analysis using registers for general and psychiatric  
6  
7 hospital admissions, contacts to general practitioners and practising specialists and  
8  
9 drug prescriptions. *Acta Psychiatr Scand* 2000, **102**:126-34.
- 10  
11 5. Qin P, Agerbo E, Mortensen PB. Suicide risk in relation to socioeconomic,  
12  
13 demographic, psychiatric, and familial factors: a national register-based study of all  
14  
15 suicides in Denmark, 1981–1997. *Am J Psychiatry* 2003, **160**:765-772.
- 16  
17 6. Gunnell D, Löfving S, Gustafsson JE, *et al.* School performance and risk of suicide in  
18  
19 early adulthood: follow-up of two national cohorts of Swedish schoolchildren.  
20  
21 *Journal of affective disorders*, 2011, **131**:104-112.
- 22  
23 7. Qin P, Hawton K, Mortensen PB, *et al.* Combined effects of physical illness and  
24  
25 comorbid psychiatric disorder on risk of suicide in a national population study. *Br J*  
26  
27 *Psychiatry* 2014, **204**:430-435.
- 28  
29 8. Christiansen E, Larsen KJ, Agerbo E, *et al.* Incidence and risk factors for suicide  
30  
31 attempts in a general population of young people: a Danish register-based study. *Aust*  
32  
33 *N Zealand J Psychiatry* 2012, **47**: 259-270.
- 34  
35 9. Björkenstam C, Johansson LA, Nordström P, *et al.* Suicide or undetermined intent? A  
36  
37 register-based study of signs of misclassification. *Population health metrics*, 2014,  
38  
39 **12**:11.
- 40  
41 10. Hjorthøj CR, Madsen T, Agerbo E, *et al.* Risk of suicide according to level of  
42  
43 psychiatric treatment: a nationwide nested case-control study. *Social psychiatry and*  
44  
45 *psychiatric epidemiology*, 2014; 1-9.

- 1  
2  
3 11. Lawrence DM, Holman CD, Jablensky AV, *et al.* Suicide rates in psychiatric in-  
4  
5 patients: an application of record linkage to mental health research. *Aust NZ J Public*  
6  
7 *Health* 1999, **23**:468–470.
- 8  
9  
10 12. Lawrence D, D'Arcy C, Holman J, *et al.* Increasing rates of suicide in Western  
11  
12 Australian psychiatric patients: a record linkage study. *Acta Psychiatr Scand* 2001,  
13  
14 **104**:443-451.
- 15  
16  
17 13. Morrison KB, Laing L. *Adults' use of health services in the year before death by*  
18  
19 *suicide in Alberta*. Statistics Canada; 2011.
- 20  
21 14. Appleby L, Kapur N, Shaw J, *et al.* Suicide in primary care in England: 2002-2011.  
22  
23 National Confidential Inquiry into Suicide and Homicide by People with Mental  
24  
25 Illness (NCISH). Manchester: University of Manchester 2014.  
26  
27 <http://www.bbmh.manchester.ac.uk/cmhr/research/centreforsuicideprevention/nci/reports/SuicideinPrimaryCare2014.pdf> Accessed August 2014.
- 28  
29  
30  
31  
32 15. ISD Scotland: The Scottish Suicide Information Database Report 2014.  
33  
34 <http://www.isdscotland.org/Health-Topics/Public-Health/Publications/index.asp?ID=1232> Accessed August 2014.
- 35  
36  
37  
38  
39 16. Webb RT, Kontopantelis E, Doran T, *et al.* Suicide risk in primary care patients with  
40  
41 major physical diseases: a case-control study. *Arch Gen Psychiatry* 2012, **69**:256-264.
- 42  
43  
44 17. Lyons RA, Jones KH, John G, *et al.* The SAIL databank: linking multiple health and  
45  
46 social care datasets. *BMC Med Inform Decis Making* 2009, **9**:3.
- 47  
48  
49  
50 18. Ford DV, Jones KH, Verplancke JP, *et al.* The SAIL Databank: building a national  
51  
52 architecture for e-health research and evaluation. *BMC Health Serv Res* 2009, **9**:1.
- 53  
54  
55  
56  
57  
58  
59  
60

- 1  
2  
3 19. World Health Organization: *The ICD-10 classification of mental and behavioural*  
4 *disorders: Clinical descriptions and diagnostic guidelines*. WHO: Geneva; 1993.  
5  
6  
7  
8 20. Office of National Statistics. 2011 Census Results for Wales. ONS 16<sup>th</sup> July 2012.  
9  
10 <http://wales.gov.uk/docs/statistics/2012/120716-census-2011-first-results-wales->  
11 [en.pdf](#) Accessed September 2014.  
12  
13  
14  
15 21. Office of National Statistics. Statistical bulletin: Suicide rates in the United Kingdom,  
16 2006 to 2010. ONS 26<sup>th</sup> January 2012. [http://www.ons.gov.uk/ons/rel/subnational-](http://www.ons.gov.uk/ons/rel/subnational-health4/suicides-in-the-united-kingdom/2010/stb-statistical-bulletin.html)  
17 [health4/suicides-in-the-united-kingdom/2010/stb-statistical-bulletin.html](#) Accessed  
18 August 2014.  
19  
20  
21  
22  
23  
24  
25 22. McGregor JJ, Brooks CJ, Chalasani P, *et al*. The Health Informatics Trial  
26 Enhancement Project (HITE): Using routinely collected primary care data to identify  
27 potential participants for a depression trial. *Trials* 2010, **11**:39.  
28  
29  
30  
31  
32  
33 23. Brooks CJ, Stephens JW, Price DE, *et al*. Use of a patient linked data warehouse to  
34 facilitate diabetes trial recruitment from primary care. *Primary Care Diabetes* 2009,  
35 **3**:245-248  
36  
37  
38  
39  
40 24. Hill RA, Brophy S, Brunt H, *et al*. Protocol of the baseline assessment for the  
41 Environments for Healthy Living (EHL) Wales cohort study. *BMC Public Health*  
42 2010, **10**:150  
43  
44  
45  
46  
47  
48 25. Fone DL, Dunstan F, White J, *et al*. Cohort Profile: The Caerphilly Health and Social  
49 Needs Electronic Cohort Study (E-CATALyST). *International Journal of*  
50 *Epidemiology*, 2013, **42**:1620-1628.  
51  
52  
53  
54 26. Rodgers SE, Heaven M, Lacey A, *et al*. Cohort profile: the housing regeneration and  
55 health study. *Int J Epidemiol* 2012, dys200.  
56  
57  
58  
59  
60

- 1  
2  
3 27. SAIL Databank: Core Data Sets. Swansea University: Swansea  
4  
5 <http://www.saildatabank.com/data-dictionary/sail-datasets> Accessed September 2014.  
6  
7  
8 28. Brock A, Baker A, Griffiths C, *et al.* Suicide trends and geographical variations in the  
9  
10 United Kingdom, 1991–2004. *Health Statistics Quarterly* 2006, **31**:6-22.  
11  
12  
13 29. Carroll R, Hawton K, Kapur N, *et al.* Impact of the growing use of narrative verdicts  
14  
15 by coroners on geographic variations in suicide: analysis of coroners' inquest data.  
16  
17 *Journal of Public Health* 2011, **10**:1-7.  
18  
19  
20 30. Gunnell D, Hawton, K, Kapur N. Coroners' verdicts and suicide statistics in England  
21  
22 and Wales. *BMJ* 2011, **343**:d6030.  
23  
24  
25 31. Hill C, Cook, L. Narrative verdicts and their impact on mortality statistics in England  
26  
27 and Wales. *Health Statistics Quarterly* 2011, **49**:81-100.  
28  
29  
30 32. Gunnell D, Bennewith O, Simkin S, *et al.* Time trends in coroners' use of different  
31  
32 verdicts for possible suicides and their impact on officially reported incidence of  
33  
34 suicide in England: 1990-2005. *Psychol Med* 2013, **43**:1415-1422.  
35  
36  
37 33. Office of National Statistics. Statistical bulletin: Suicide rates in the United Kingdom,  
38  
39 2011. ONS 22 January 2013. [http://www.ons.gov.uk/ons/rel/subnational-](http://www.ons.gov.uk/ons/rel/subnational-health4/suicides-in-the-united-kingdom/2011/stb-suicide-bulletin.html)  
40  
41 [health4/suicides-in-the-united-kingdom/2011/stb-suicide-bulletin.html](http://www.ons.gov.uk/ons/rel/subnational-health4/suicides-in-the-united-kingdom/2011/stb-suicide-bulletin.html) Accessed  
42  
43 August 2014.  
44  
45  
46 34. Grimes DA, Schultz KF. Compared to what? Finding controls in a case control study.  
47  
48 *Lancet* 2005, **365**: 1429–33.  
49  
50  
51 35. Office for National Statistics. Welsh index of Multiple Deprivation 2011. Summary  
52  
53 report, Welsh Government; 2011.  
54  
55  
56  
57  
58  
59  
60

- 1  
2  
3 36. Townsend P, Phillimore P, Beattie A. *Health and Deprivation: Inequality and the*  
4  
5 *North*. Routledge: London; 1988.  
6
- 7 37. Office for National Statistics. Super Output Areas 2011.  
8  
9 <http://www.ons.gov.uk/ons/guide-method/geography/beginner-s-guide/census/super->  
10 [output-areas--soas-/index.html](http://www.ons.gov.uk/ons/guide-method/geography/beginner-s-guide/census/super-) Accessed August 2014.  
11  
12
- 13 38. Bruzzi P, Green SB, Byar DP, *et al*. Estimating the population attributable risk for  
14 multiple risk factors using case-control data. *Am J Epidemiol* 1985, **122**:904-914.  
15  
16
- 17 39. Great Britain: Data Protection Act 1998. London: HMSO.  
18  
19 <http://www.legislation.gov.uk/ukpga/1998/29/contents> Accessed August 2014.  
20  
21  
22
- 23 40. MRC: Policy and Guidance on Sharing of Research Data from Population and Patient  
24 Studies. MRC 23rd November 2011.  
25  
26 <http://www.mrc.ac.uk/Utilities/Documentrecord/index.htm?d=MRC008302> Accessed  
27 August 2014.  
28  
29
- 30 41. Wellcome Trust: Data sharing policy. Wellcome Trust August 2010.  
31  
32 <http://www.wellcome.ac.uk/About-us/Policy/Policy-and-position->  
33 [statements/WTX035043.htm](http://www.wellcome.ac.uk/About-us/Policy/Policy-and-position-) Accessed August 2014.  
34  
35  
36  
37  
38  
39
- 40 42. Thiru K, Hassey A, Sullivan F. Systematic review of scope and quality of electronic  
41 patient record data in primary care. *BMJ* 2003, **326**:1070.  
42  
43  
44
- 45 43. University of Bristol, Suicide Research Centre.  
46  
47 <http://www.bristol.ac.uk/psychiatry/research/suicideresearch.html> Accessed August  
48 2014.  
49  
50  
51  
52  
53  
54  
55  
56  
57  
58  
59  
60

1  
2  
3 44. The University of Manchester Centre for Suicide Prevention.

4  
5 <http://www.bbmh.manchester.ac.uk/cmhr/research/centreforsuicideprevention/>

6  
7 Accessed August 2014.

8  
9  
10 45. University of Oxford, Centre for Suicide Research. <http://cebmh.warne.ox.ac.uk/csr/>

11  
12 Accessed August 2014.

13  
14  
15 46. ISD Scotland. Scottish Suicide Information Database (ScotSID). ISD Scotland 2011.

16  
17 <http://data.gov.uk/dataset/scottish-suicide-information-database> Accessed August

18  
19 2014.  
20  
21  
22  
23  
24  
25  
26  
27  
28  
29  
30  
31  
32  
33  
34  
35  
36  
37  
38  
39  
40  
41  
42  
43  
44  
45  
46  
47  
48  
49  
50  
51  
52  
53  
54  
55  
56  
57  
58  
59  
60

STROBE Statement—checklist of items that should be included in reports of observational studies—  
protocol limits some of these

|                              | Item No | Recommendation                                                                                                                                                                                                                                                                                                                                                                                                                                                         | Line                       |
|------------------------------|---------|------------------------------------------------------------------------------------------------------------------------------------------------------------------------------------------------------------------------------------------------------------------------------------------------------------------------------------------------------------------------------------------------------------------------------------------------------------------------|----------------------------|
| <b>Title and abstract</b>    | 1       | (a) Indicate the study's design with a commonly used term in the title or the abstract                                                                                                                                                                                                                                                                                                                                                                                 | 33                         |
|                              |         | (b) Provide in the abstract an informative and balanced summary of what was done and what was found                                                                                                                                                                                                                                                                                                                                                                    | 34-41                      |
| <b>Introduction</b>          |         |                                                                                                                                                                                                                                                                                                                                                                                                                                                                        |                            |
| Background/rationale         | 2       | Explain the scientific background and rationale for the investigation being reported                                                                                                                                                                                                                                                                                                                                                                                   | 73-131                     |
| Objectives                   | 3       | State specific objectives, including any prespecified hypotheses                                                                                                                                                                                                                                                                                                                                                                                                       | 136-150                    |
| <b>Methods</b>               |         |                                                                                                                                                                                                                                                                                                                                                                                                                                                                        |                            |
| Study design                 | 4       | Present key elements of study design early in the paper                                                                                                                                                                                                                                                                                                                                                                                                                | 152-7                      |
| Setting                      | 5       | Describe the setting, locations, and relevant dates, including periods of recruitment, exposure, follow-up, and data collection                                                                                                                                                                                                                                                                                                                                        | 158-300                    |
| Participants                 | 6       | (a) <i>Cohort study</i> —Give the eligibility criteria, and the sources and methods of selection of participants. Describe methods of follow-up<br><i>Case-control study</i> —Give the eligibility criteria, and the sources and methods of case ascertainment and control selection. Give the rationale for the choice of cases and controls<br><i>Cross-sectional study</i> —Give the eligibility criteria, and the sources and methods of selection of participants | 209-282                    |
|                              |         | (b) <i>Cohort study</i> —For matched studies, give matching criteria and number of exposed and unexposed<br><i>Case-control study</i> —For matched studies, give matching criteria and the number of controls per case                                                                                                                                                                                                                                                 |                            |
| Variables                    | 7       | Clearly define all outcomes, exposures, predictors, potential confounders, and effect modifiers. Give diagnostic criteria, if applicable                                                                                                                                                                                                                                                                                                                               | Table 3 , table 4, 283-349 |
| Data sources/<br>measurement | 8*      | For each variable of interest, give sources of data and details of methods of assessment (measurement). Describe comparability of assessment methods if there is more than one group                                                                                                                                                                                                                                                                                   | Table 3 , table 4, 283-349 |
| Bias                         | 9       | Describe any efforts to address potential sources of bias                                                                                                                                                                                                                                                                                                                                                                                                              | 350-360                    |
| Study size                   | 10      | Explain how the study size was arrived at                                                                                                                                                                                                                                                                                                                                                                                                                              | 245-282, table 2           |
| Quantitative variables       | 11      | Explain how quantitative variables were handled in the analyses. If applicable, describe which groupings were chosen and why                                                                                                                                                                                                                                                                                                                                           | 314-<br>359:protocol       |
|                              |         |                                                                                                                                                                                                                                                                                                                                                                                                                                                                        |                            |
| Statistical methods          | 12      | (a) Describe all statistical methods, including those used to control for confounding                                                                                                                                                                                                                                                                                                                                                                                  | 314-<br>359:protocol       |
|                              |         | (b) Describe any methods used to examine subgroups and interactions                                                                                                                                                                                                                                                                                                                                                                                                    | 314-<br>359:protocol       |
|                              |         | (c) Explain how missing data were addressed                                                                                                                                                                                                                                                                                                                                                                                                                            | 314-<br>359:protocol       |
|                              |         | (d) <i>Cohort study</i> —If applicable, explain how loss to follow-up was addressed                                                                                                                                                                                                                                                                                                                                                                                    | 236-282                    |

1  
2 *Case-control study*—If applicable, explain how matching of cases  
3 and controls was addressed

4 *Cross-sectional study*—If applicable, describe analytical methods  
5 taking account of sampling strategy  
6

---

7 (e) Describe any sensitivity analyses

8 Continued on next page  
9  
10  
11  
12  
13  
14  
15  
16  
17  
18  
19  
20  
21  
22  
23  
24  
25  
26  
27  
28  
29  
30  
31  
32  
33  
34  
35  
36  
37  
38  
39  
40  
41  
42  
43  
44  
45  
46  
47  
48  
49  
50  
51  
52  
53  
54  
55  
56  
57  
58  
59  
60

For peer review only

| <b>Results</b>           |     |                                                                                                                                                                                                              |                   |
|--------------------------|-----|--------------------------------------------------------------------------------------------------------------------------------------------------------------------------------------------------------------|-------------------|
| Participants             | 13* | (a) Report numbers of individuals at each stage of study—eg numbers potentially eligible, examined for eligibility, confirmed eligible, included in the study, completing follow-up, and analysed            | Table 2, protocol |
|                          |     | (b) Give reasons for non-participation at each stage                                                                                                                                                         | Will              |
|                          |     | (c) Consider use of a flow diagram                                                                                                                                                                           | Will              |
| Descriptive data         | 14* | (a) Give characteristics of study participants (eg demographic, clinical, social) and information on exposures and potential confounders                                                                     | Will              |
|                          |     | (b) Indicate number of participants with missing data for each variable of interest                                                                                                                          | Will              |
|                          |     | (c) <i>Cohort study</i> —Summarise follow-up time (eg, average and total amount)                                                                                                                             |                   |
| Outcome data             | 15* | <i>Cohort study</i> —Report numbers of outcome events or summary measures over time                                                                                                                          |                   |
|                          |     | <i>Case-control study</i> —Report numbers in each exposure category, or summary measures of exposure                                                                                                         | Will              |
|                          |     | <i>Cross-sectional study</i> —Report numbers of outcome events or summary measures                                                                                                                           |                   |
| Main results             | 16  | (a) Give unadjusted estimates and, if applicable, confounder-adjusted estimates and their precision (eg, 95% confidence interval). Make clear which confounders were adjusted for and why they were included | Will              |
|                          |     | (b) Report category boundaries when continuous variables were categorized                                                                                                                                    | Will              |
|                          |     | (c) If relevant, consider translating estimates of relative risk into absolute risk for a meaningful time period                                                                                             |                   |
| Other analyses           | 17  | Report other analyses done—eg analyses of subgroups and interactions, and sensitivity analyses                                                                                                               | Will              |
| <b>Discussion</b>        |     |                                                                                                                                                                                                              |                   |
| Key results              | 18  | Summarise key results with reference to study objectives                                                                                                                                                     | Will              |
| Limitations              | 19  | Discuss limitations of the study, taking into account sources of potential bias or imprecision. Discuss both direction and magnitude of any potential bias                                                   | Will              |
| Interpretation           | 20  | Give a cautious overall interpretation of results considering objectives, limitations, multiplicity of analyses, results from similar studies, and other relevant evidence                                   | Will              |
| Generalisability         | 21  | Discuss the generalisability (external validity) of the study results                                                                                                                                        | Will              |
| <b>Other information</b> |     |                                                                                                                                                                                                              |                   |
| Funding                  | 22  | Give the source of funding and the role of the funders for the present study and, if applicable, for the original study on which the present article is based                                                | 447               |

\*Give information separately for cases and controls in case-control studies and, if applicable, for exposed and unexposed groups in cohort and cross-sectional studies.

**Note:** An Explanation and Elaboration article discusses each checklist item and gives methodological background and published examples of transparent reporting. The STROBE checklist is best used in conjunction with this article (freely available on the Web sites of PLoS Medicine at <http://www.plosmedicine.org/>, Annals of Internal Medicine at <http://www.annals.org/>, and Epidemiology at <http://www.epidem.com/>). Information on the STROBE Initiative is available at [www.strobe-statement.org](http://www.strobe-statement.org).

# BMJ Open

**Suicide Information Database: A protocol for a population-based, routinely collected data linkage study to explore risks and patterns of healthcare contact prior to suicide to identify opportunities for intervention.**

|                                 |                                                                                                                                                                                                                                                                                                                                                                                                                                                         |
|---------------------------------|---------------------------------------------------------------------------------------------------------------------------------------------------------------------------------------------------------------------------------------------------------------------------------------------------------------------------------------------------------------------------------------------------------------------------------------------------------|
| Journal:                        | <i>BMJ Open</i>                                                                                                                                                                                                                                                                                                                                                                                                                                         |
| Manuscript ID:                  | bmjopen-2014-006780.R1                                                                                                                                                                                                                                                                                                                                                                                                                                  |
| Article Type:                   | Protocol                                                                                                                                                                                                                                                                                                                                                                                                                                                |
| Date Submitted by the Author:   | 14-Oct-2014                                                                                                                                                                                                                                                                                                                                                                                                                                             |
| Complete List of Authors:       | John, Ann; Swansea University, College of Medicine<br>Dennis, Mick; Swansea University, College of Medicine<br>Kosnes, Liv; Swansea University, College of Medicine<br>Gunnell, David; Bristol University, School of Social and Community Medicine<br>Scourfield, Jonathan; Cardiff University, School of Social Sciences<br>Ford, David; Swansea University, Health Information Research Unit<br>Lloyd, Keith; Swansea University, College of Medicine |
| <b>Primary Subject Heading</b>: | Public health                                                                                                                                                                                                                                                                                                                                                                                                                                           |
| Secondary Subject Heading:      | Epidemiology, General practice / Family practice, Health informatics, Mental health, Public health                                                                                                                                                                                                                                                                                                                                                      |
| Keywords:                       | Suicide & self-harm < PSYCHIATRY, PUBLIC HEALTH, EPIDEMIOLOGY, Health informatics < BIOTECHNOLOGY & BIOINFORMATICS                                                                                                                                                                                                                                                                                                                                      |
|                                 |                                                                                                                                                                                                                                                                                                                                                                                                                                                         |

SCHOLARONE™  
Manuscripts

1  
2  
3 **Suicide Information Database- Cymru: A protocol for a population-based, routinely**  
4 **collected data linkage study to explore risks and patterns of healthcare contact prior to**  
5 **suicide to identify opportunities for intervention.**  
6  
7  
8

9  
10 John A<sup>1\*</sup>, Dennis M<sup>1</sup>, Kosnes L<sup>1</sup>, Gunnell D<sup>2</sup>, Scourfield J<sup>3</sup>, Ford DV<sup>1</sup>, Lloyd K<sup>1</sup>  
11

12  
13 <sup>1</sup>College of Medicine, Swansea University, Institute of Life Sciences 2, Singleton Park,  
14 Swansea, SA2 8PP, United Kingdom.  
15

16  
17  
18 <sup>2</sup>School of Social and Community Medicine, University of Bristol, Canynge Hall, 39  
19 Whatley Road, Bristol, BS8 2PS, United Kingdom.  
20

21  
22  
23 <sup>3</sup>School of Social Sciences, Cardiff University, Glamorgan Building, King Edward VII  
24 Avenue, Cardiff, CF10 3WT, United Kingdom.  
25  
26  
27

28  
29  
30  
31  
32 \*Corresponding Author: Ann John<sup>1\*</sup> [a.john@swansea.ac.uk](mailto:a.john@swansea.ac.uk); Phone: +44(0)1792 602568;  
33  
34 College of Medicine, Swansea University, Institute of Life Sciences 2, Singleton Park,  
35 Swansea, SA2 8PP, United Kingdom.  
36  
37

38  
39 Michael Dennis<sup>1</sup> [m.s.dennis@swansea.ac.uk](mailto:m.s.dennis@swansea.ac.uk), Liv Kosnes<sup>1</sup> [l.kosnes@swansea.ac.uk](mailto:l.kosnes@swansea.ac.uk), David  
40 Gunnell<sup>2</sup> [d.j.gunnell@bristol.ac.uk](mailto:d.j.gunnell@bristol.ac.uk), Jonathan Scourfield<sup>3</sup> [Scourfield@cardiff.ac.uk](mailto:Scourfield@cardiff.ac.uk), David V.  
41 Ford<sup>1</sup> [d.v.ford@swansea.ac.uk](mailto:d.v.ford@swansea.ac.uk), Keith Lloyd<sup>1</sup> [k.r.lloyd@swansea.ac.uk](mailto:k.r.lloyd@swansea.ac.uk)  
42  
43  
44  
45  
46

47 **Key words:** Suicide, case-control, database, routine data linkage.  
48

49  
50 **Word Count: 4054**  
51  
52  
53  
54  
55  
56  
57

## Abstract

### Introduction

Prevention of suicide is a global public health challenge extending beyond mental health services. Linking routinely collected health and social care system data records, for the same individual across different services and over time has enormous potential in suicide research. Most previous research linking suicide mortality data with routinely collected electronic health records involves only one or two domains of health care provision such as psychiatric in-patient care. This protocol paper describes the development of a population based, routinely collected data linkage study: the Suicide Information Database (SID-Cymru). SID-Cymru aims to contribute to the information available on people who complete suicide.

### Methods and Analysis

SID-Cymru will facilitate a series of electronic case-control studies based in the Secure Anonymised Information Linkage (SAIL) Databank. We have identified 2664 cases of suicide in Wales between 2003 and 2011 from routinely collected mortality data using International Classification of Diseases, Tenth Revision, codes X60-84 (intentional self harm) and Y10-34 (undetermined intent). Each case will be matched by age and sex to at least five controls. Records will be collated and linked from routinely collected health and social data in Wales for each individual. Conditional logistic regression will be applied to produce crude and confounder (including general practice, socioeconomic status) adjusted odds ratios.

### Ethics and Dissemination

The SAIL Databank has the required ethical permissions in place to analyse anonymised data. Ethical approval has been granted by the Information Governance Review Panel (IGRP). Findings will be disseminated through peer reviewed publications, consultations with

1  
2  
3 stakeholders and national/ international conference presentations. The improved  
4  
5 understanding of the prior health, nature of previous contacts with services, and wider social  
6  
7 circumstances of those who complete suicide will assist in prevention policy, service  
8  
9 organisation and delivery. SID-Cymru is funded through the National Institute for Social  
10  
11 Care and Health Research, Welsh Government (RFS-12-14).  
12

### 13 14 15 **Article Summary**

#### 16 17 18 Article Focus:

- 19  
20 • Case definitions of probable and possible suicides
- 21  
22 • Identifying risk factors and patterns of service use in those who complete suicide
- 23  
24 • Designing a study
- 25  
26  
27  
28

#### 29 30 Key messages:

- 31  
32 • SID-Cymru will facilitate a series of case- control studies of those who complete  
33  
34 suicide
- 35  
36 • Recency of primary care, in- and out-patient hospital and emergency department  
37  
38 contacts including attendance for self-harm, primary care diagnosis of depression,  
39  
40 levels of treatment with anti-depressants and trends in such treatment over time, rural  
41  
42 and urban geography, educational attainment, contacts for the elderly and levels of  
43  
44 physical illness will be investigated
- 45  
46 • Results will be adjusted for a number of confounders
- 47  
48  
49  
50

#### 51 52 Strengths and Limitations of this study:

- 53  
54 • Based on the general population
- 55  
56  
57  
58

- Includes all deaths through suicide, not just those known to mental health services
- Based on routinely collected health and social care data linkage
- Linkage across multiple domains. Most suicide data linkage studies are limited to only one or two domains of health care provision.
- Prescriptions not actual use

For peer review only

## Introduction

Every year approximately 800,000 people die by suicide worldwide, one to two in every 100 deaths. Prevention of suicide is a global public health challenge. Collaborative working across government departments, with a public health approach extending beyond mental health service care is essential<sup>1</sup>. Global patterns and national trends in the incidence of suicide and its key risk factors change over time. The therapeutic and preventive challenges of understanding and responding to these changes are considerable.

Vast amounts of personal data are routinely collected on a daily basis by health and social care systems around the world to support clinical management and patient care. Linking these data records, for the same individuals across different services and over time, offers a powerful, population-wide resource. Such integrated datasets have been used to study a range of health issues to identify risk and protective factors and to examine outcomes. The secondary use of these data has enormous potential in suicide research. Improved consideration of the prior health, wider social circumstances and points of access to services of all individuals who complete suicide can be achieved.<sup>2-4</sup>

Studies from the Nordic countries, have demonstrated the usefulness of data-linkage across register based studies in suicide research.<sup>5-10</sup> Others<sup>11-13</sup> have demonstrated that collating and linking sets of routinely collected whole population based data, such as GP records, out-patient data, in-patient activity, with mortality data enable more detailed analysis of risk factors for those people completing suicide. Most previous research linking suicide mortality data with routinely collected electronic health records involves only one or two domains of health care provision such as psychiatric in-patient care.

1  
2  
3 In the United Kingdom various systems exist to examine suicide deaths. The National  
4 Confidential Inquiry into Suicide and Homicide (NCISH) by people with Mental Illness  
5 focuses on suicide cases that were in contact with mental health services (approximately 25%  
6 of total) in the year prior to their deaths.<sup>3</sup> However this provides limited information on  
7 issues of suicide in the general population and may hamper the effectiveness of wider  
8 preventive efforts.<sup>1</sup> In a recent report NCISH<sup>14</sup> examined aspects of primary healthcare prior  
9 to all suicides in England between 2002-2011; however no linkage was made with data from  
10 other service providers such as emergency departments.  
11  
12  
13  
14  
15  
16  
17  
18  
19

20  
21 Scotland has recently established enhanced data collection in relation to suicide, however,  
22 further development is needed in order for 'ScotSID' to be able to examine healthcare  
23 pathways and contact with more than one health service;<sup>15</sup> England does not currently have a  
24 dedicated repository for suicide data though studies have made use of the Clinical Practice  
25 Research Datalink (CPRD; [www.cprd.com](http://www.cprd.com)), which represents approximately 8.5% of the UK  
26 population from 600 General Practices (GP's) in England.<sup>16</sup> CPRD can be linked with data  
27 from the National Health Service (NHS) Hospital Episode Statistics (HES;  
28 <http://www.hscic.gov.uk>) and mortality data from the Office of National Statistics (ONS;  
29 <http://www.ons.gov.uk>) but has limited emergency department data.  
30  
31  
32  
33  
34  
35  
36  
37  
38  
39  
40  
41

42 SID-Cymru will access and link information on prior health, nature of previous contacts with  
43 services, and wider social circumstances of all those who complete suicide (known and  
44 unknown to mental health services) within the population of Wales via anonymised routinely  
45 collected electronic data held in healthcare and social datasets from the Secure Anonymised  
46 Information Linkage (SAIL) Databank ([www.saildatabank.com](http://www.saildatabank.com)).<sup>17 18</sup> This brings together,  
47 links and anonymises the widest possible range of person-based data currently available in  
48  
49  
50  
51  
52  
53  
54  
55  
56  
57  
58  
59  
60

1  
2  
3 the UK. The SAIL Databank was originally set up by the Health Information Research Unit  
4  
5 (HIRU) at the College of Medicine at Swansea University.  
6  
7

8  
9 SID-Cymru is part of the research programme related to the Health e-Research Collaboration  
10  
11 UK (HeRC UK), led by the Medical Research Council (MRC) and based in the Centre for the  
12  
13 Improvement of Population Health through e-Records Research (CIPHER). CIPHER is a UK  
14  
15 Clinical Research Collaboration (UKCRC) Public Health Research Centre of Excellence set  
16  
17 within the College of Medicine at Swansea University. SID-Cymru will provide timely robust  
18  
19 data to inform the future strategic direction of and the first step in designing and evaluating  
20  
21 effective interventions to prevent suicide. It will use the International Classification of  
22  
23 Disease, Tenth Revision,<sup>19</sup> (ICD-10) definitions and instructions for classifying causes of  
24  
25 death which will allow for comparisons with other countries and thus support research of  
26  
27 relevance globally. An emphasis will be given to issues where there are opportunities for  
28  
29 intervention or where electronic data linkage confers an advantage to its investigation.  
30  
31

### 32 33 **Aim**

34  
35  
36 The main aim is to establish a Suicide Information Database- Cymru as a population based  
37  
38 resource for studying factors and service contacts associated with all suicide deaths through  
39  
40 routinely collected data linkage case control studies.  
41  
42

### 43 44 **Objectives:**

#### 45 46 *Phase 1:*

- 47  
48  
49  
50  
51  
52  
53  
54  
55  
56  
57  
58  
59  
60  
61  
62  
63  
64  
65  
66  
67  
68  
69  
70  
71  
72  
73  
74  
75  
76  
77  
78  
79  
80  
81  
82  
83  
84  
85  
86  
87  
88  
89  
90  
91  
92  
93  
94  
95  
96  
97  
98  
99  
100  
101  
102  
103  
104  
105  
106  
107  
108  
109  
110  
111  
112  
113  
114  
115  
116  
117  
118  
119  
120  
121  
122  
123  
124  
125  
126  
127  
128  
129  
130  
131  
132  
133  
134  
135  
136  
137  
138  
139  
140  
141  
142  
143  
144  
145  
146  
147  
148  
149  
150  
151  
152  
153  
154  
155  
156  
157  
158  
159  
160  
161  
162  
163  
164  
165  
166  
167  
168  
169  
170  
171  
172  
173  
174  
175  
176  
177  
178  
179  
180  
181  
182  
183  
184  
185  
186  
187  
188  
189  
190  
191  
192  
193  
194  
195  
196  
197  
198  
199  
200  
201  
202  
203  
204  
205  
206  
207  
208  
209  
210  
211  
212  
213  
214  
215  
216  
217  
218  
219  
220  
221  
222  
223  
224  
225  
226  
227  
228  
229  
230  
231  
232  
233  
234  
235  
236  
237  
238  
239  
240  
241  
242  
243  
244  
245  
246  
247  
248  
249  
250  
251  
252  
253  
254  
255  
256  
257  
258  
259  
260  
261  
262  
263  
264  
265  
266  
267  
268  
269  
270  
271  
272  
273  
274  
275  
276  
277  
278  
279  
280  
281  
282  
283  
284  
285  
286  
287  
288  
289  
290  
291  
292  
293  
294  
295  
296  
297  
298  
299  
300  
301  
302  
303  
304  
305  
306  
307  
308  
309  
310  
311  
312  
313  
314  
315  
316  
317  
318  
319  
320  
321  
322  
323  
324  
325  
326  
327  
328  
329  
330  
331  
332  
333  
334  
335  
336  
337  
338  
339  
340  
341  
342  
343  
344  
345  
346  
347  
348  
349  
350  
351  
352  
353  
354  
355  
356  
357  
358  
359  
360  
361  
362  
363  
364  
365  
366  
367  
368  
369  
370  
371  
372  
373  
374  
375  
376  
377  
378  
379  
380  
381  
382  
383  
384  
385  
386  
387  
388  
389  
390  
391  
392  
393  
394  
395  
396  
397  
398  
399  
400  
401  
402  
403  
404  
405  
406  
407  
408  
409  
410  
411  
412  
413  
414  
415  
416  
417  
418  
419  
420  
421  
422  
423  
424  
425  
426  
427  
428  
429  
430  
431  
432  
433  
434  
435  
436  
437  
438  
439  
440  
441  
442  
443  
444  
445  
446  
447  
448  
449  
450  
451  
452  
453  
454  
455  
456  
457  
458  
459  
460  
461  
462  
463  
464  
465  
466  
467  
468  
469  
470  
471  
472  
473  
474  
475  
476  
477  
478  
479  
480  
481  
482  
483  
484  
485  
486  
487  
488  
489  
490  
491  
492  
493  
494  
495  
496  
497  
498  
499  
500  
501  
502  
503  
504  
505  
506  
507  
508  
509  
510  
511  
512  
513  
514  
515  
516  
517  
518  
519  
520  
521  
522  
523  
524  
525  
526  
527  
528  
529  
530  
531  
532  
533  
534  
535  
536  
537  
538  
539  
540  
541  
542  
543  
544  
545  
546  
547  
548  
549  
550  
551  
552  
553  
554  
555  
556  
557  
558  
559  
560  
561  
562  
563  
564  
565  
566  
567  
568  
569  
570  
571  
572  
573  
574  
575  
576  
577  
578  
579  
580  
581  
582  
583  
584  
585  
586  
587  
588  
589  
590  
591  
592  
593  
594  
595  
596  
597  
598  
599  
600  
601  
602  
603  
604  
605  
606  
607  
608  
609  
610  
611  
612  
613  
614  
615  
616  
617  
618  
619  
620  
621  
622  
623  
624  
625  
626  
627  
628  
629  
630  
631  
632  
633  
634  
635  
636  
637  
638  
639  
640  
641  
642  
643  
644  
645  
646  
647  
648  
649  
650  
651  
652  
653  
654  
655  
656  
657  
658  
659  
660  
661  
662  
663  
664  
665  
666  
667  
668  
669  
670  
671  
672  
673  
674  
675  
676  
677  
678  
679  
680  
681  
682  
683  
684  
685  
686  
687  
688  
689  
690  
691  
692  
693  
694  
695  
696  
697  
698  
699  
700  
701  
702  
703  
704  
705  
706  
707  
708  
709  
710  
711  
712  
713  
714  
715  
716  
717  
718  
719  
720  
721  
722  
723  
724  
725  
726  
727  
728  
729  
730  
731  
732  
733  
734  
735  
736  
737  
738  
739  
740  
741  
742  
743  
744  
745  
746  
747  
748  
749  
750  
751  
752  
753  
754  
755  
756  
757  
758  
759  
760  
761  
762  
763  
764  
765  
766  
767  
768  
769  
770  
771  
772  
773  
774  
775  
776  
777  
778  
779  
780  
781  
782  
783  
784  
785  
786  
787  
788  
789  
790  
791  
792  
793  
794  
795  
796  
797  
798  
799  
800  
801  
802  
803  
804  
805  
806  
807  
808  
809  
810  
811  
812  
813  
814  
815  
816  
817  
818  
819  
820  
821  
822  
823  
824  
825  
826  
827  
828  
829  
830  
831  
832  
833  
834  
835  
836  
837  
838  
839  
840  
841  
842  
843  
844  
845  
846  
847  
848  
849  
850  
851  
852  
853  
854  
855  
856  
857  
858  
859  
860  
861  
862  
863  
864  
865  
866  
867  
868  
869  
870  
871  
872  
873  
874  
875  
876  
877  
878  
879  
880  
881  
882  
883  
884  
885  
886  
887  
888  
889  
890  
891  
892  
893  
894  
895  
896  
897  
898  
899  
900  
901  
902  
903  
904  
905  
906  
907  
908  
909  
910  
911  
912  
913  
914  
915  
916  
917  
918  
919  
920  
921  
922  
923  
924  
925  
926  
927  
928  
929  
930  
931  
932  
933  
934  
935  
936  
937  
938  
939  
940  
941  
942  
943  
944  
945  
946  
947  
948  
949  
950  
951  
952  
953  
954  
955  
956  
957  
958  
959  
960  
961  
962  
963  
964  
965  
966  
967  
968  
969  
970  
971  
972  
973  
974  
975  
976  
977  
978  
979  
980  
981  
982  
983  
984  
985  
986  
987  
988  
989  
990  
991  
992  
993  
994  
995  
996  
997  
998  
999  
1000
  - 50  
51  
52  
53  
54  
55  
56  
57  
58  
59  
60  
61  
62  
63  
64  
65  
66  
67  
68  
69  
70  
71  
72  
73  
74  
75  
76  
77  
78  
79  
80  
81  
82  
83  
84  
85  
86  
87  
88  
89  
90  
91  
92  
93  
94  
95  
96  
97  
98  
99  
100  
101  
102  
103  
104  
105  
106  
107  
108  
109  
110  
111  
112  
113  
114  
115  
116  
117  
118  
119  
120  
121  
122  
123  
124  
125  
126  
127  
128  
129  
130  
131  
132  
133  
134  
135  
136  
137  
138  
139  
140  
141  
142  
143  
144  
145  
146  
147  
148  
149  
150  
151  
152  
153  
154  
155  
156  
157  
158  
159  
160  
161  
162  
163  
164  
165  
166  
167  
168  
169  
170  
171  
172  
173  
174  
175  
176  
177  
178  
179  
180  
181  
182  
183  
184  
185  
186  
187  
188  
189  
190  
191  
192  
193  
194  
195  
196  
197  
198  
199  
200  
201  
202  
203  
204  
205  
206  
207  
208  
209  
210  
211  
212  
213  
214  
215  
216  
217  
218  
219  
220  
221  
222  
223  
224  
225  
226  
227  
228  
229  
230  
231  
232  
233  
234  
235  
236  
237  
238  
239  
240  
241  
242  
243  
244  
245  
246  
247  
248  
249  
250  
251  
252  
253  
254  
255  
256  
257  
258  
259  
260  
261  
262  
263  
264  
265  
266  
267  
268  
269  
270  
271  
272  
273  
274  
275  
276  
277  
278  
279  
280  
281  
282  
283  
284  
285  
286  
287  
288  
289  
290  
291  
292  
293  
294  
295  
296  
297  
298  
299  
300  
301  
302  
303  
304  
305  
306  
307  
308  
309  
310  
311  
312  
313  
314  
315  
316  
317  
318  
319  
320  
321  
322  
323  
324  
325  
326  
327  
328  
329  
330  
331  
332  
333  
334  
335  
336  
337  
338  
339  
340  
341  
342  
343  
344  
345  
346  
347  
348  
349  
350  
351  
352  
353  
354  
355  
356  
357  
358  
359  
360  
361  
362  
363  
364  
365  
366  
367  
368  
369  
370  
371  
372  
373  
374  
375  
376  
377  
378  
379  
380  
381  
382  
383  
384  
385  
386  
387  
388  
389  
390  
391  
392  
393  
394  
395  
396  
397  
398  
399  
400  
401  
402  
403  
404  
405  
406  
407  
408  
409  
410  
411  
412  
413  
414  
415  
416  
417  
418  
419  
420  
421  
422  
423  
424  
425  
426  
427  
428  
429  
430  
431  
432  
433  
434  
435  
436  
437  
438  
439  
440  
441  
442  
443  
444  
445  
446  
447  
448  
449  
450  
451  
452  
453  
454  
455  
456  
457  
458  
459  
460  
461  
462  
463  
464  
465  
466  
467  
468  
469  
470  
471  
472  
473  
474  
475  
476  
477  
478  
479  
480  
481  
482  
483  
484  
485  
486  
487  
488  
489  
490  
491  
492  
493  
494  
495  
496  
497  
498  
499  
500  
501  
502  
503  
504  
505  
506  
507  
508  
509  
510  
511  
512  
513  
514  
515  
516  
517  
518  
519  
520  
521  
522  
523  
524  
525  
526  
527  
528  
529  
530  
531  
532  
533  
534  
535  
536  
537  
538  
539  
540  
541  
542  
543  
544  
545  
546  
547  
548  
549  
550  
551  
552  
553  
554  
555  
556  
557  
558  
559  
560  
561  
562  
563  
564  
565  
566  
567  
568  
569  
570  
571  
572  
573  
574  
575  
576  
577  
578  
579  
580  
581  
582  
583  
584  
585  
586  
587  
588  
589  
590  
591  
592  
593  
594  
595  
596  
597  
598  
599  
600  
601  
602  
603  
604  
605  
606  
607  
608  
609  
610  
611  
612  
613  
614  
615  
616  
617  
618  
619  
620  
621  
622  
623  
624  
625  
626  
627  
628  
629  
630  
631  
632  
633  
634  
635  
636  
637  
638  
639  
640  
641  
642  
643  
644  
645  
646  
647  
648  
649  
650  
651  
652  
653  
654  
655  
656  
657  
658  
659  
660  
661  
662  
663  
664  
665  
666  
667  
668  
669  
670  
671  
672  
673  
674  
675  
676  
677  
678  
679  
680  
681  
682  
683  
684  
685  
686  
687  
688  
689  
690  
691  
692  
693  
694  
695  
696  
697  
698  
699  
700  
701  
702  
703  
704  
705  
706  
707  
708  
709  
710  
711  
712  
713  
714  
715  
716  
717  
718  
719  
720  
721  
722  
723  
724  
725  
726  
727  
728  
729  
730  
731  
732  
733  
734  
735  
736  
737  
738  
739  
740  
741  
742  
743  
744  
745  
746  
747  
748  
749  
750  
751  
752  
753  
754  
755  
756  
757  
758  
759  
760  
761  
762  
763  
764  
765  
766  
767  
768  
769  
770  
771  
772  
773  
774  
775  
776  
777  
778  
779  
780  
781  
782  
783  
784  
785  
786  
787  
788  
789  
790  
791  
792  
793  
794  
795  
796  
797  
798  
799  
800  
801  
802  
803  
804  
805  
806  
807  
808  
809  
810  
811  
812  
813  
814  
815  
816  
817  
818  
819  
820  
821  
822  
823  
824  
825  
826  
827  
828  
829  
830  
831  
832  
833  
834  
835  
836  
837  
838  
839  
840  
841  
842  
843  
844  
845  
846  
847  
848  
849  
850  
851  
852  
853  
854  
855  
856  
857  
858  
859  
860  
861  
862  
863  
864  
865  
866  
867  
868  
869  
870  
871  
872  
873  
874  
875  
876  
877  
878  
879  
880  
881  
882  
883  
884  
885  
886  
887  
888  
889  
890  
891  
892  
893  
894  
895  
896  
897  
898  
899  
900  
901  
902  
903  
904  
905  
906  
907  
908  
909  
910  
911  
912  
913  
914  
915  
916  
917  
918  
919  
920  
921  
922  
923  
924  
925  
926  
927  
928  
929  
930  
931  
932  
933  
934  
935  
936  
937  
938  
939  
940  
941  
942  
943  
944  
945  
946  
947  
948  
949  
950  
951  
952  
953  
954  
955  
956  
957  
958  
959  
960  
961  
962  
963  
964  
965  
966  
967  
968  
969  
970  
971  
972  
973  
974  
975  
976  
977  
978  
979  
980  
981  
982  
983  
984  
985  
986  
987  
988  
989  
990  
991  
992  
993  
994  
995  
996  
997  
998  
999  
1000

- 1  
2  
3  
4  
5  
6  
7  
8  
9
- To explore and address the methodological issues relating to the development of this database of completed suicides and the linkage of data across different datasets and settings.

10  
11

*Phase 2:*

- 12  
13  
14  
15  
16  
17  
18  
19  
20  
21  
22  
23  
24  
25  
26
- To investigate risk factors and trends for suicide including: primary care diagnosis of depression; levels of treatment with anti-depressants and trends in such treatment over time; rural and urban geography; educational attainment; levels of physical illness.
  - To investigate settings and pathways of care where people are in contact with services in the year leading up to their suicide across the whole population and in specific groups such as the elderly.

27  
28

**Methods and Analyses**

29  
30  
31

*Design*

32  
33  
34  
35  
36  
37  
38  
39  
40  
41  
42  
43  
44

SID-Cymru will facilitate a series of electronic population based, routinely collected data linkage case-control studies on completed suicide in Wales between 2003 and 2011. Wales has a population of 3.1 million<sup>20</sup> and is part of the United Kingdom. There are approximately 32,000 deaths of Welsh nationals registered each year of which around 300 (approximately 1%) are registered as suicides.<sup>21</sup>

45  
46  
47

*Data Source*

48  
49  
50  
51  
52  
53  
54  
55  
56

SID-Cymru will be assembled within the SAIL Databank,<sup>17</sup> a growing resource that already holds over a billion anonymised records from 13 databases which can be anonymously linked at the individual record level.<sup>18</sup> The SAIL Databank has been previously used for linkage of routine data.<sup>22-26</sup>

1  
2  
3 Within the SAIL Databank a split-file approach to anonymisation is used to overcome issues  
4 of confidentiality and disclosure in health-related data warehousing.<sup>18</sup> Demographic data are  
5 sent to a partner organisation, NHS Wales Information Service (NWIS), where all identifiable  
6 information is removed; clinical data are sent directly to HIRU, where, for each dataset  
7 within the SAIL Databank, an individual is assigned an encrypted Anonymised Linking Field  
8 (ALF). The ALF is used to link anonymised individuals across datasets, thus supporting the  
9 opportunity to conduct longitudinal analyses of an individual's journey through multiple  
10 health, education and social datasets.<sup>17</sup> Additionally Residential Anonymised Linking Fields  
11 (RALFs) have been created for all residences in Wales and enables linkage of anonymised  
12 household and environment data with the health records of individual residents without the  
13 identity of the residences or residents being known to researchers.<sup>26</sup>

14  
15  
16  
17  
18  
19  
20  
21  
22  
23  
24  
25  
26  
27  
28 *The primary study base* will be the Welsh Demographic Service<sup>27</sup> (WDS) hosted within the  
29 SAIL Databank. The WDS is a core dataset available within the SAIL Databank and part of a  
30 set of services to manage administrative information (demographic data) for NHS patients in  
31 Wales. The WDS was introduced early in 2009 replacing a similar service known as the NHS  
32 Wales Administrative Register (NHS AR). The WDS data is collected from GP practices via  
33 the Exeter System and more than five million individuals are currently present in the WDS  
34 dataset within the SAIL Databank. The WDS is a register of all individuals that have at some  
35 point in time been registered with a Welsh General Practitioner (GP) or required some form  
36 of NHS health care provision in Wales. The electronic collation of WDS / NHS AR data  
37 originated in 1960 and is updated and maintained by NWIS,<sup>27</sup> ensuring that address changes  
38 (within and out of Wales) and death notices are included in the register. The original (non-  
39 anonymised) version of the NHS AR has been used in the HIRU Matching Algorithm for  
40 Consistent Results in Anonymised Linkage (MACRAL), making the WDS / NHS AR the  
41  
42  
43  
44  
45  
46  
47  
48  
49  
50  
51  
52  
53  
54  
55  
56  
57  
58  
59  
60

1  
2  
3 master list for all Welsh residents and using probabilistic matching to find the associated  
4  
5 NHS numbers that are then encrypted into ALF's.  
6  
7

8 Deaths in Wales should be registered within five days of the date of death. However  
9  
10 legislation in Wales means that when a coroner's inquest takes place, the death cannot be  
11  
12 registered until the inquest is complete. Since the Office for National Statistics (ONS), the  
13  
14 national agency where all deaths are collated, has no conclusive information about the death  
15  
16 until it is registered, there is a delay between the date the death occurred and when the death  
17  
18 is added to the annual ONS mortality dataset. The ONS found that less than 41% of deaths  
19  
20 going to inquest were registered within 3 months, though 96% were registered within 1  
21  
22 year.<sup>28</sup> Thus precise information on the annual incidence of suicide may be delayed by up to  
23  
24 two years. Information collected at death registration is recorded on the Registration Online  
25  
26 system by registrars. Most of the information is normally supplied by the informant (usually a  
27  
28 close relative of the deceased) while the cause of death (COD) is usually obtained from the  
29  
30 Medical Certificate of Cause of Death (MCCD) completed by a medical practitioner when  
31  
32 the death is certified using ICD-10 coding or the coroner if there is an inquest.<sup>19</sup> Notably, a  
33  
34 death is not officially registered within the Annual District Deaths Extract (ADDE) until the  
35  
36 COD has been finalised, and thus the year of death and the year of registration may not  
37  
38 concur. The *primary dataset* used to construct SID-Cymru is the ADDE from the ONS. The  
39  
40 ADDE is inclusive of Welsh residents who died outside of Wales, and holds information  
41  
42 about COD derived from death certificates on all deaths in Wales.  
43  
44  
45  
46  
47  
48

#### 49 *Definition of Suicide for Cases*

50  
51

52 The true number of suicides is difficult to determine because a coroner's conclusion of  
53  
54 suicide must be 'beyond a reasonable doubt' i.e. that the death was intentionally self inflicted  
55  
56 and in some areas coroners have increasingly (since 2001) reported narrative conclusions  
57  
58

1  
2  
3 rather than reporting it as suicide.<sup>29 30</sup> Previously when insufficient information was recorded  
4  
5 by the coroner ONS coders used to record the death as an accident which inevitably led to  
6  
7 some suicides being classified as accidents or misadventure. The ONS has recently issued  
8  
9 guidance on this issue following a coding practice review.<sup>31</sup> Current ONS practice includes  
10  
11 deaths where intention is ‘undetermined whether accidentally or purposefully inflicted’; thus  
12  
13 deaths where there may be no intention to take life, such as in relation to injury or poisoning,  
14  
15 are included in suicide figures by ONS. Currently there is no access to coroners’ narrative  
16  
17 verdicts within the SAIL Databank as a possible method for review of case inclusion.  
18  
19

20  
21  
22 There is evidence to suggest that a high proportion of deaths from poisoning and hanging that  
23  
24 receive accidental verdicts, are found, when subjected to clinical review, to be suicides.<sup>32</sup>  
25  
26 Such possible deaths through suicide will be included in SID-Cymru as an opportunity for  
27  
28 further separate and combined analysis; thus the additional ICD-10 codes relating to  
29  
30 ‘accidental poisoning with prescribed drugs’ (X40-X41, X43-X49) and ‘accidental hanging’  
31  
32 (W75-W76) may be used along with ‘sequelae of external causes of morbidity and mortality’  
33  
34 (Y87, Y87.2, Y89, Y89.9).<sup>18</sup> Thus with SID-Cymru we aim to establish a Suicide  
35  
36 Information Database that can be a resource for studying factors associated with *all*  
37  
38 probable, as well as, possible deaths through suicide; by including accidental  
39  
40 hanging/strangulation and accidental poisoning, excluding, narcotics and psychodysleptics  
41  
42 (i.e., possible suicides), along with the ONS traditional method of defining suicides, which  
43  
44 includes suicides and deaths of undetermined intent (probable suicides).<sup>2</sup>  
45  
46  
47

#### 48 49 *Identification of Cases and Controls*

50  
51  
52 SID-Cymru cases encompass suicides (‘intentional self-harm’ [ICD-10: X60-84]) and  
53  
54 probable deaths through suicide (‘undetermined intent’ [ICD-10: Y10-34, excl.Y33.9])  
55  
56 recorded from the MCCD and presented within ADDE as the underlying COD. Those coded  
57  
58  
59  
60

1  
2  
3 Y33.9/U50.9 (pending verdicts) are excluded since a large proportion of these are  
4  
5 subsequently found to be homicides. Probable suicide defined above can be supplemented  
6  
7 with possible deaths through suicide if required. Cases of probable suicide will be identified  
8  
9 and extracted by use of the ICD-10 codes<sup>19</sup> defined above and depicted in Table 1.  
10  
11

12  
13 ONS figures include those over 15 years of age only, due to the possibility that deaths in  
14  
15 younger children coded as undetermined events may be caused by unverifiable accidents,  
16  
17 neglect or abuse.<sup>33</sup> SID-Cymru will allow for the analysis of suicides and probable suicides  
18  
19 for the 10 to 14 year age band. Official ONS mortality statistics are produced based on the  
20  
21 number of deaths registered in a particular calendar year, rather than the number of deaths  
22  
23 that occurred in that year. This means their figures include some deaths that occurred in years  
24  
25 prior to the reference year (approximately 4%). As SID-Cymru will link and review data in  
26  
27 the period leading up to death it is important to ensure the match/end date reflects the correct  
28  
29 time period (specific to each individual case), i.e. date of death not date of registration, to  
30  
31 afford an accurate perspective on utilisation of resources and help seeking behaviours.  
32  
33 Consequently the actual date of death (ADOD) will be used in the matching criteria to  
34  
35 establish a data review 'end date' for controls, rather than the registered date of death  
36  
37 (RDOD) referred to in ONS reports. Mortality data within the SAIL Databank is only  
38  
39 available from 2003, thus the earliest case inclusion relates to ADOD's from the 1st January  
40  
41 2003. To minimise the underestimation of cases identified (i.e., due to delays in COD  
42  
43 confirmation and registration of DOD) the case inclusion for SID-Cymru includes cases aged  
44  
45 10 years and over at ADOD, where the ADOD took place between 01/01/2003 and 31/12/  
46  
47 2011.  
48  
49  
50  
51  
52  
53  
54  
55  
56  
57  
58  
59  
60

**Table 1.** ICD-10 codes used to identify and extract cases with death through probable suicide for SID-Cymru.

| Short name                            | Description                                                                                        | ICD10 codes                   |
|---------------------------------------|----------------------------------------------------------------------------------------------------|-------------------------------|
| Poisoning                             | Poisoning by and exposure to one or more types of poisons                                          | X60-X69, Y10-Y19              |
| Hanging & suffocation                 | Hanging, strangulation and suffocation                                                             | X70, Y20                      |
| Drowning                              | Drowning and submersion                                                                            | X71, Y21                      |
| Guns                                  | Firearm discharge                                                                                  | X72-X74, Y22-Y24              |
| Sharp object                          | Sharp object                                                                                       | X78, Y28                      |
| Jumping from a high place             | Jumping from a high place                                                                          | X80, Y30                      |
| Jumping or lying before moving object | Jumping or lying before moving object                                                              | X81, Y31                      |
| Explosives & Fire                     | Explosive material, smoke, fire, flames and hot objects                                            | X75-X77, Y25-Y27              |
| Other or unspecified events           | Intentional self-harm by other/un- specified means; Other/un- specified events undetermined intent | X83-X84, Y33-Y34 (excl.Y33.9) |
| Crash by motor vehicle                | Crashing of motor vehicle intentional and undetermined intent                                      | X82, Y32                      |
| Blunt Object                          | Blunt Object                                                                                       | X79, Y29                      |

Table 2 presents the number of registered deaths through suicide per year and actual deaths per year between 2003 and 2011 as reported by the ONS and as identified for SID-Cymru within the SAIL Databank.

**Table 2.** Probable Suicide<sup>1</sup> Deaths for Wales 2003 – 2011 identified within the SAIL Databank for SID-Cymru.

| Count by Year <sup>2</sup>                                       | 2003 | 2004 | 2005 | 2006 | 2007 | 2008 | 2009 | 2010 | 2011 | TOTAL       |
|------------------------------------------------------------------|------|------|------|------|------|------|------|------|------|-------------|
| <b>Probable Suicides ADOD<sup>3</sup> within SID<sup>4</sup></b> | 361  | 303  | 287  | 278  | 279  | 282  | 272  | 292  | 304  | <b>2664</b> |
| <b>Probable Suicides RDOD<sup>5</sup> within SID</b>             | 274  | 330  | 270  | 300  | 288  | 266  | 257  | 287  | 340  | <b>2612</b> |
| <b>ONS Probable Suicides<sup>6</sup> RDOD</b>                    | 332  | 330  | 269  | 300  | 289  | 266  | 258  | 288  | 341  | <b>2673</b> |

<sup>1</sup>Probable suicides = ICD-10 codes for Intentional [X60-84], Undetermined [Y10-34 excl. Y33.9] self-harm;

<sup>2</sup>Values are number of individuals unless otherwise indicated <sup>3</sup>ADOD = Year death occurred; <sup>4</sup>Cases identified for SID-Cymru includes those aged 10 years and over; <sup>5</sup>RDOD = Year death was registered; <sup>6</sup>Cases reported by the ONS include those aged 15 years and over.

*Matched Controls* will be identified within the WDS as live individuals matched on age (to the nearest year) and gender who were registered within the WDS for at least one year prior to matched case's ADOD. The controls will be required to be alive at the time of the matched case's ADOD (i.e., the match/end date). The use of live controls limits the introduction of bias relating to deaths, particularly in the younger age groups, of those undertaking risky behaviours resulting in premature death (e.g. substance use, accidents) that may be associated with unrecognised suicidal behaviours or known risk factors. To add to the power of the study we aim to identify at least five controls to every one case.<sup>34</sup>

### *Routine Data Sources*

For SID-Cymru the data collected on identified cases and controls, via ADDE and the WDS respectively, will be linked to other routinely collected datasets, retrospectively allowing a review of each individual's pathway through the various services. Linkage with, for example, GP system data provides varying information about patients going back several years, including previous diagnosis, presenting symptoms and previous medications prescribed. This dataset can be used to review contacts with the GP and, consequently, infer the development / diagnosis of any new medical conditions including depression and self harm prior to suicide. Linkage with in-patient data will allow a review of hospital contacts and Emergency Department datasets will give information on crisis contacts. This will provide comprehensive insights into help seeking behaviours and management across settings. Data sets currently accessible via the SAIL Databank which will be linked to SID-Cymru are presented in Table 3. There are several other datasets currently under negotiation for inclusion within the SAIL Databank to which, in the future, SID-Cymru could link. These include Department of Work and Pensions (DWP) employment and incapacity status, Looked After Children, fostering, Substance Misuse Services, Sexually Transmitted Infections and Police Data.

**Table 3.** Datasets available within the SAIL Databank for linkage with SID-Cymru cases and controls.

| Dataset                                   | Data Description                                                                                                                                                                                                                                                                                       | Data Provider                                                                        | Data Type                              | Geographical Coverage | Available from |
|-------------------------------------------|--------------------------------------------------------------------------------------------------------------------------------------------------------------------------------------------------------------------------------------------------------------------------------------------------------|--------------------------------------------------------------------------------------|----------------------------------------|-----------------------|----------------|
| Annual District Death Extract (ADDE)      | Register of all deaths relating to Welsh residents, including those that died out of Wales.                                                                                                                                                                                                            | NHS Wales' Informatics Service (NWIS)/ Health Solutions Wales (HSW) on behalf of ONS | Registry data                          | Wales                 | 2003           |
| Welsh Demographic Service (WDS)           | Administrative information about individuals in Wales that use NHS services; such as address and practice registration history. It replaced the NHS Wales Administrative Register (NHSAR) in 2009.                                                                                                     | NHS Wales' Informatics Service (NWIS)/ HSW                                           | Administrative (mandatory) data return | Wales                 | 1990           |
| Area Based Deprivation Scores             | Lower Super Output Area - Townsend Deprivation Index and Welsh Index of Multiple Deprivation Scores.                                                                                                                                                                                                   | NHS Wales' Informatics Service (NWIS)/ HSW                                           | Administrative data                    | Wales                 | 2001 / 2005    |
| Education Attainment (DCEL)               | Educational attainment at key stages (pre 16 year old). Data collated from school census, the national pupil survey and educational attainment databases by the Welsh Government.                                                                                                                      | Department for Children, Education, Lifelong Learning and Skills (DCELLS)            | Administrative / survey data.          | Wales                 | 2005           |
| Primary Care GP dataset                   | Each GP practice uses a clinical information system to maintain an electronic health record for each of their patients; capturing the signs, symptoms, test results, diagnoses, prescribed treatment, referrals for specialist treatment and social aspects relating to the patients home environment. | Welsh General Practices that have signed up to the SAIL Databank                     | Clinical system data                   | Wales                 | 2000           |
| Patient Episode Database for Wales (PEDW) | NHS Wales - hospital admissions (Inpatients and day cases) dataset comprising of attendance and clinical information for all hospital admissions: includes diagnoses and operations performed.                                                                                                         | NHS Wales' Informatics Service (NWIS)/ Health Solutions Wales (HSW)                  | Administrative (mandatory) data return | Wales                 | 1997           |
| Outpatient Dataset (OPD)                  | Attendance information for all NHS Wales hospital outpatient appointments.                                                                                                                                                                                                                             | NHS Wales' Informatics Service (NWIS)/ Health Solutions Wales (HSW)                  | Administrative (mandatory) data return | Wales                 | 2004           |
| Emergency Department Data Set (EDDS)      | Administrative and clinical information for all NHS Wales Accident and Emergency department attendances. Includes the All Wales Injury Surveillance Systems (AWISS) dataset                                                                                                                            | NHS Wales' Informatics Service (NWIS)/ Health Solutions Wales (HSW)                  | Administrative (mandatory) data return | Wales                 | 2009           |

## Measurements

### *Data Variables/Characteristics*

Data to be included in SID-Cymru will be extracted from the SAIL Databank and will include basic demographics; educational data; ADOD and RDOD; numbers and percentages for deprivation; proportions known to different healthcare settings in the period prior to death; inclusive medical history, i.e., primary care contact and diagnosis (by Read Codes), information about hospital / psychiatric admission and diagnosis (by ICD-10 Codes), and nature of service contact e.g. for self-harm, substance misuse. Therefore, the routinely collected data held by the NHS and other public bodies supplying the existing SAIL Databank will maximise the narrative of a death through suicide while being less resource intensive than psychological autopsies. The initial variables to be extracted and linked across data sets are described in Table 4.

## Planned Analyses

The primary objective is to establish SID-Cymru as a resource for future analysis. It is important to maximise the utility of the resource, and some general principles of analysis have been determined.

## Descriptive Epidemiology

### *Phase 1:*

- Identification and description of Cases: Number of deaths registered with ONS and available within the SAIL Databank, with relevant ICD-10 codes defined as suicides, between 2003-2011.

**Table 4.** Characteristics to be identified and collected through data linkage for SID-Cymru Cases and Controls.

| <b>Data</b>            | <b>Characteristics</b>       |
|------------------------|------------------------------|
| <b>Demographics</b>    | Sex                          |
|                        | Date of Birth                |
|                        | Marital status*              |
|                        | Employment*                  |
|                        | Education*                   |
| <b>Mortality</b>       | Date of Death,               |
|                        | Age at DOD (in years)        |
|                        | Registered Date of Death     |
|                        | Cause of Death (ICD-10 code) |
| <b>Deprivation</b>     | LSOA                         |
|                        | WIMD                         |
|                        | Townsend                     |
|                        | Rural-Urban Indicators       |
| <b>Medical History</b> | GP register*                 |
|                        | GP diagnosis (Read code)*    |
|                        | GP events*                   |
|                        | Hospital attendance          |
|                        | Hospital diagnosis           |
|                        | Hospital events              |
|                        | Outpatient attendance        |
|                        | Outpatient diagnosis*        |
|                        | Outpatient events            |
|                        | ED attendance*               |
|                        | ED diagnosis*                |
| ED events*             |                              |
| Psychiatric Admission* |                              |

\* Where data are available; there may be limitations to the number of cases with this information.

- Identification and description of Matched Controls.
- Basic demographics.
- Table of delay (days) in registering suicides and undetermined deaths.

*Phase 2:*

- Proportions known to different healthcare settings: number and percentages, with main diagnosis, that had a general hospital admission; emergency department contact for self-harm and other indications; psychiatric admission and primary care contact in the year prior to probable suicide.
- Numbers and percentages for deprivation, employment status, educational achievement and medical history (e.g., chronic pain, terminal illness, medication, previous self harm, and substance misuse) will also be sought.
- Number of cases with missing data across data sets for variables of interest will be noted.

**Area based measures of socio-economic deprivation**

Deprivation will be measured at Lower Super Output Area (LSOA) level using the Welsh Index of Multiple Deprivation<sup>35</sup> (WIMD) and Townsend Index Score.<sup>36</sup> All suicides and matched controls will be assigned to a lower layer super output area (LSOA). There are 1909 LSOAs in Wales with an average population of 1500 people (range: 1000-3000).<sup>37</sup> Linkage to WIMD and Townsend Index information is available in the SAIL Databank. These will be ranked for deprivation, divided into quintiles and standardised rates calculated.

**Odds ratios for the described exposures in the case control study**

1  
2  
3 A case-control study utilising SID-Cymru will be population based and so the relative risk of  
4  
5 suicide will be estimated by conditional logistic regression model with SPSS (version 20).  
6  
7 Crude odds ratios will be adjusted for general practice and/or LSOA by matching cases and  
8  
9 controls. Unadjusted estimates, confounder-adjusted estimates and their precision (e.g., 95%  
10  
11 confidence interval) will be produced. Interactions between variables will be assessed with  
12  
13 the log likelihood ratio test based on results from the adjusted analysis. The population  
14  
15 attributable risk will be calculated<sup>38</sup> on the basis of adjusted relative risks from the full  
16  
17 analysis and the distribution of exposures in the cases.  
18  
19

20  
21 We will also report information on the completeness of linkage with each dataset.  
22  
23

## 24 **Ethics and Dissemination**

### 25 *Ethics*

26  
27  
28 A large amount of preliminary work on anonymisation methodologies was undertaken to  
29  
30 create the SAIL Databank system,<sup>17- 18</sup> and the SAIL Databank has the required ethical  
31  
32 permissions and processes in place to analyse anonymised data. It operates within a robust  
33  
34 series of guidelines in line with the Caldicott principles and the National Information  
35  
36 Governance Board for Health and Social Care.<sup>18</sup> Ethical approval has been granted for SID-  
37  
38 Cymru from HIRU's Information Governance Review Panel (IGRP), an independent body  
39  
40 consisting of a range of government, regulatory and professional agencies. In compliance  
41  
42 with the IGRP rulings and the Data Protection Act 1998<sup>39</sup> individual level data and personal  
43  
44 identifier linkage codes will not be removed from the SAIL Databank and all analyses will be  
45  
46 carried out within the SAIL Databank gateway at Swansea University, a secure access point  
47  
48 to data within the SAIL Databank. The key points of the MRC/Wellcome Trust data sharing  
49  
50 policy will be followed.<sup>40 41</sup>  
51  
52  
53  
54  
55  
56  
57  
58  
59  
60

### *Dissemination*

This paper describes the protocol for the development of a Suicide Information Database (SID-Cymru), and the research opportunities available from an electronic case-control study of suicides within a whole population. SID-Cymru will have the ability to link suicide cases anonymously to primary and secondary health information along with other social care data, allowing us to review each case's journey through these datasets. The establishment of SID-Cymru and exploration of the linkage methodologies will improve our understanding of those who complete suicide (particularly those not known to mental health services) and will be used to inform service planning and policy decision making and implementation. It will help identify key opportunities and settings for prevention of this tragic event. By so doing, SID-Cymru will join other international databases of suicide research and provide a platform for further investigation and data linkages.

In order for SID-Cymru to become a functional resource it is important to be aware of the limits of health data available; though widely used in research, and offering a broad range of information about treatment and associated conditions, there are issues relating to determining the quality of patient records, the completeness of data available and any conclusions that may be drawn from them, perhaps particularly concerning primary care records.<sup>42</sup> That is, working with routinely collected data presented in its "raw" format requires a certain level of database analysis skills where duplicates, missing and erroneous entries are common occurrences. Whilst some such administrative / system-based recording issues are easy to identify and account for in individual datasets, it is not always apparent what is correct and what is erroneous at the combined level. Indeed, this problem is confounded when linkage of data reveals conflicting information causing routine data to appear inaccessible and attempts at linkage discouraged. Thus, a secondary aim for SID-Cymru is to share the skills developed as part of establishing a suicide database, which can

1  
2  
3 aid colleagues who may lack such analytical expertise and foster greater multi-disciplinary  
4  
5 collaborations and advance suicide research.  
6  
7

8 The UK has a strong presence in form of a wide range of publications and expertise relating  
9  
10 to suicide research. Successful and dedicated Suicide Research Centres exist in Bristol,  
11  
12 Manchester and Oxford,<sup>43-45</sup> and Scotland recently commenced work on a Scottish Suicide  
13  
14 Information Database ('ScotSID').<sup>46</sup> These centres of excellence report broadly about suicide,  
15  
16 though for logistical reasons, often a regional focus is retained, relating to project funding,  
17  
18 analytical and interventional work; for that reason the establishment of a Suicide Information  
19  
20 Database in Wales will build on and enhance existing UK suicide resources and infrastructure  
21  
22 since the level of linkage available within the SAIL Databank is unique in this field. Unique  
23  
24 opportunities within the SAIL Databank include linkage across primary, secondary and  
25  
26 emergency department data and with education data. Findings will be disseminated through  
27  
28 publications in peer reviewed journals and presentations at local, national and international  
29  
30 conferences. Communication and consultation with key stakeholders from health and social  
31  
32 care (for example primary care, mental health, Royal Colleges), government and other policy  
33  
34 makers, as well as, the third sector will occur. Dissemination will be facilitated by the wider  
35  
36 roles and responsibilities in suicide prevention, nationally and internationally, of members of  
37  
38 the research team.  
39  
40  
41  
42  
43

#### 44 **Implications and Significance**

45  
46 Valuable opportunities exist for a wide range of epidemiological and clinical studies on  
47  
48 suicide in Wales and SID-Cymru has the potential to become an important resource in  
49  
50 facilitating such research which will be of relevance internationally. In addition to the records  
51  
52 that have already been included for linkage with SID-Cymru it is expected that over time  
53  
54 relevant information from other data sources (e.g. the DWP) will be linked to SID-Cymru to  
55  
56  
57  
58

1  
2  
3 provide a wider range of information on issues such as individuals' circumstances, the nature  
4 of their deaths, and their contact with extended services. Additionally, linkage can be made  
5 with non-routinely collected datasets such as that held by NCISH. Specific hypotheses that  
6 will be explored include: recency of primary care, hospital and emergency department  
7 contacts including attendance for self-harm, primary care diagnosis of depression, levels of  
8 treatment with anti-depressants and trends in such treatment over time, rural and urban  
9 geography, contacts for the elderly and levels of physical illness.

10 Findings of current and projected public health importance will be assessed and presented to  
11 support policy makers, commissioners and providers of health and social care in Wales. Non-  
12 identifiable information from this project will be made available to researchers in Wales, the  
13 UK and international collaborators. The initial project focus will be on identification of cases  
14 and controls, data linkage opportunities and methodological issues relating to the  
15 establishment of a Suicide Information Database and routine data linkage (Phase 1), before  
16 commencing data extraction and analysis (Phase 2). The proposed data collation and linkage  
17 of primary, secondary and emergency department health information together with  
18 educational data are currently unique in the United Kingdom. Thus it is possible to develop a  
19 central repository for information relating to suicide in whole population that will be of  
20 relevance internationally. This paper describes the design and development of a Suicide  
21 Information Database in its infancy.

### 22 **Authors' contributions**

23  
24  
25  
26  
27  
28  
29  
30  
31  
32  
33  
34  
35  
36  
37  
38  
39  
40  
41  
42  
43  
44  
45  
46  
47  
48  
49  
50  
51  
52  
53  
54  
55  
56  
57  
58  
59  
60  
AJ, the principal investigator, was responsible for the conceptualization of SID-Cymru. AJ,  
KL, MD, DG, JS for the design of SID-Cymru; AJ and LK for its on-going  
operationalisation. AJ and LK drafted the manuscript. All authors read and approved the final  
manuscript.

## Funding Statement

This study was funded by a grant from the National Institute for Social Care and Health Research, Welsh Government, grant number RFS-12-14. DG is a National Institute for Health Research (England) Senior Investigator.

## Competing interests

The authors declare that they have no competing interests.

## Ethics approval

Ethical approval has been granted by the Health Information Research Unit Information Governance Review Panel at the College of Medicine at Swansea University.

## Data sharing statement

It will be possible to access the data after the publication of the results. Researchers interested in collaborations or further information are invited to contact AJ at [a.john@swansea.ac.uk](mailto:a.john@swansea.ac.uk).

## References

1. World Health Organisation. 66th World Health Assembly. Draft comprehensive mental health action plan 2013-2020. A66/10 Rev.1, WHO 16 May 2013. [http://apps.who.int/gb/e/e\\_wha66.html](http://apps.who.int/gb/e/e_wha66.html) Accessed September 2014.
2. Linsley KR, Schapira K, Kelly TP. Open verdict v. suicide—importance to research. *Br J Psychiatry* 2001, **178**:465-468.
3. Appleby L, Kapur N, Shaw J, *et al*. Annual Report: England, Northern Ireland, Scotland and Wales. Manchester: University of Manchester 2013.

1  
2  
3 [http://www.bbmh.manchester.ac.uk/cmhr/centreforsuicideprevention/nci/reports/Ann](http://www.bbmh.manchester.ac.uk/cmhr/centreforsuicideprevention/nci/reports/AnnualReport2013_UK.pdf)  
4  
5 [ualReport2013\\_UK.pdf](http://www.bbmh.manchester.ac.uk/cmhr/centreforsuicideprevention/nci/reports/AnnualReport2013_UK.pdf) Accessed July 2014.  
6  
7

- 8 4. Andersen UA, Andersen M, Rosholm JU, *et al.* Contacts to the health care system  
9 prior to suicide: a comprehensive analysis using registers for general and psychiatric  
10 hospital admissions, contacts to general practitioners and practising specialists and  
11 drug prescriptions. *Acta Psychiatr Scand* 2000, **102**:126-34.  
12
- 13 5. Qin P, Agerbo E, Mortensen PB. Suicide risk in relation to socioeconomic,  
14 demographic, psychiatric, and familial factors: a national register-based study of all  
15 suicides in Denmark, 1981–1997. *Am J Psychiatry* 2003, **160**:765-772.  
16
- 17 6. Gunnell D, Löfving S, Gustafsson JE, *et al.* School performance and risk of suicide in  
18 early adulthood: follow-up of two national cohorts of Swedish schoolchildren.  
19  
20 *Journal of affective disorders*, 2011, **131**:104-112.  
21
- 22 7. Qin P, Hawton K, Mortensen PB, *et al.* Combined effects of physical illness and  
23 comorbid psychiatric disorder on risk of suicide in a national population study. *Br J*  
24 *Psychiatry* 2014, **204**:430-435.  
25
- 26 8. Christiansen E, Larsen KJ, Agerbo E, *et al.* Incidence and risk factors for suicide  
27 attempts in a general population of young people: a Danish register-based study. *Aust*  
28 *N Zealand J Psychiatry* 2012, **47**: 259-270.  
29
- 30 9. Björkenstam C, Johansson LA, Nordström P, *et al.* Suicide or undetermined intent? A  
31 register-based study of signs of misclassification. *Population health metrics*, 2014,  
32  
33 **12**:11.  
34
- 35 10. Hjorthøj CR, Madsen T, Agerbo E, *et al.* Risk of suicide according to level of  
36 psychiatric treatment: a nationwide nested case-control study. *Social psychiatry and*  
37 *psychiatric epidemiology*, 2014; 1-9.  
38  
39  
40  
41  
42  
43  
44  
45  
46  
47  
48  
49  
50  
51  
52  
53  
54  
55  
56  
57  
58  
59  
60

- 1  
2  
3 11. Lawrence DM, Holman CD, Jablensky AV, *et al.* Suicide rates in psychiatric in-  
4  
5 patients: an application of record linkage to mental health research. *Aust NZ J Public*  
6  
7 *Health* 1999, **23**:468–470.
- 8  
9  
10 12. Lawrence D, D'Arcy C, Holman J, *et al.* Increasing rates of suicide in Western  
11  
12 Australian psychiatric patients: a record linkage study. *Acta Psychiatr Scand* 2001,  
13  
14 **104**:443-451.
- 15  
16  
17 13. Morrison KB, Laing L. *Adults' use of health services in the year before death by*  
18  
19 *suicide in Alberta.* Statistics Canada; 2011.
- 20  
21 14. Appleby L, Kapur N, Shaw J, *et al.* Suicide in primary care in England: 2002-2011.  
22  
23 National Confidential Inquiry into Suicide and Homicide by People with Mental  
24  
25 Illness (NCISH). Manchester: University of Manchester 2014.  
26  
27 <http://www.bbmh.manchester.ac.uk/cmhr/research/centreforsuicideprevention/nci/reports/SuicideinPrimaryCare2014.pdf> Accessed August 2014.
- 28  
29  
30  
31  
32 15. ISD Scotland: The Scottish Suicide Information Database Report 2014.  
33  
34 <http://www.isdscotland.org/Health-Topics/Public-Health/Publications/index.asp?ID=1232> Accessed August 2014.
- 35  
36  
37  
38  
39 16. Webb RT, Kontopantelis E, Doran T, *et al.* Suicide risk in primary care patients with  
40  
41 major physical diseases: a case-control study. *Arch Gen Psychiatry* 2012, **69**:256-264.
- 42  
43  
44 17. Lyons RA, Jones KH, John G, *et al.* The SAIL databank: linking multiple health and  
45  
46 social care datasets. *BMC Med Inform Decis Making* 2009, **9**:3.
- 47  
48  
49  
50 18. Ford DV, Jones KH, Verplancke JP, *et al.* The SAIL Databank: building a national  
51  
52 architecture for e-health research and evaluation. *BMC Health Serv Res* 2009, **9**:1.
- 53  
54  
55  
56  
57  
58  
59  
60

- 1  
2  
3 19. World Health Organization: *The ICD-10 classification of mental and behavioural*  
4 *disorders: Clinical descriptions and diagnostic guidelines*. WHO: Geneva; 1993.  
5  
6  
7  
8 20. Office of National Statistics. 2011 Census Results for Wales. ONS 16<sup>th</sup> July 2012.  
9  
10 <http://wales.gov.uk/docs/statistics/2012/120716-census-2011-first-results-wales->  
11 [en.pdf](http://wales.gov.uk/docs/statistics/2012/120716-census-2011-first-results-wales-en.pdf) Accessed September 2014.  
12  
13  
14  
15 21. Office of National Statistics. Statistical bulletin: Suicide rates in the United Kingdom,  
16 2006 to 2010. ONS 26<sup>th</sup> January 2012. [http://www.ons.gov.uk/ons/rel/subnational-](http://www.ons.gov.uk/ons/rel/subnational-health4/suicides-in-the-united-kingdom/2010/stb-statistical-bulletin.html)  
17 [health4/suicides-in-the-united-kingdom/2010/stb-statistical-bulletin.html](http://www.ons.gov.uk/ons/rel/subnational-health4/suicides-in-the-united-kingdom/2010/stb-statistical-bulletin.html) Accessed  
18 August 2014.  
19  
20  
21  
22  
23  
24  
25 22. McGregor JJ, Brooks CJ, Chalasani P, *et al*. The Health Informatics Trial  
26 Enhancement Project (HITE): Using routinely collected primary care data to identify  
27 potential participants for a depression trial. *Trials* 2010, **11**:39.  
28  
29  
30  
31  
32  
33 23. Brooks CJ, Stephens JW, Price DE, *et al*. Use of a patient linked data warehouse to  
34 facilitate diabetes trial recruitment from primary care. *Primary Care Diabetes* 2009,  
35 **3**:245-248  
36  
37  
38  
39  
40 24. Hill RA, Brophy S, Brunt H, *et al*. Protocol of the baseline assessment for the  
41 Environments for Healthy Living (EHL) Wales cohort study. *BMC Public Health*  
42 2010, **10**:150  
43  
44  
45  
46  
47  
48 25. Fone DL, Dunstan F, White J, *et al*. Cohort Profile: The Caerphilly Health and Social  
49 Needs Electronic Cohort Study (E-CATALyST). *International Journal of*  
50 *Epidemiology*, 2013, **42**:1620-1628.  
51  
52  
53  
54  
55 26. Rodgers SE, Heaven M, Lacey A, *et al*. Cohort profile: the housing regeneration and  
56 health study. *Int J Epidemiol* 2012, dys200.  
57  
58  
59  
60

- 1  
2  
3 27. SAIL Databank: Core Data Sets. Swansea University: Swansea  
4  
5 <http://www.saildatabank.com/data-dictionary/sail-datasets> Accessed September 2014.  
6  
7  
8 28. Brock A, Baker A, Griffiths C, *et al.* Suicide trends and geographical variations in the  
9  
10 United Kingdom, 1991–2004. *Health Statistics Quarterly* 2006, **31**:6-22.  
11  
12  
13 29. Carroll R, Hawton K, Kapur N, *et al.* Impact of the growing use of narrative verdicts  
14  
15 by coroners on geographic variations in suicide: analysis of coroners' inquest data.  
16  
17 *Journal of Public Health* 2011, **10**:1-7.  
18  
19  
20  
21 30. Gunnell D, Hawton, K, Kapur N. Coroners' verdicts and suicide statistics in England  
22  
23 and Wales. *BMJ* 2011, **343**:d6030.  
24  
25  
26 31. Hill C, Cook, L. Narrative verdicts and their impact on mortality statistics in England  
27  
28 and Wales. *Health Statistics Quarterly* 2011, **49**:81-100.  
29  
30  
31 32. Gunnell D, Bennewith O, Simkin S, *et al.* Time trends in coroners' use of different  
32  
33 verdicts for possible suicides and their impact on officially reported incidence of  
34  
35 suicide in England: 1990-2005. *Psychol Med* 2013, **43**:1415-1422.  
36  
37  
38 33. Office of National Statistics. Statistical bulletin: Suicide rates in the United Kingdom,  
39  
40 2011. ONS 22 January 2013. [http://www.ons.gov.uk/ons/rel/subnational-](http://www.ons.gov.uk/ons/rel/subnational-health4/suicides-in-the-united-kingdom/2011/stb-suicide-bulletin.html)  
41  
42 [health4/suicides-in-the-united-kingdom/2011/stb-suicide-bulletin.html](http://www.ons.gov.uk/ons/rel/subnational-health4/suicides-in-the-united-kingdom/2011/stb-suicide-bulletin.html) Accessed  
43  
44 August 2014.  
45  
46 34. Grimes DA, Schultz KF. Compared to what? Finding controls in a case control study.  
47  
48 *Lancet* 2005, **365**: 1429–33.  
49  
50  
51 35. Office for National Statistics. Welsh index of Multiple Deprivation 2011. Summary  
52  
53 report, Welsh Government; 2011.  
54  
55  
56  
57  
58  
59  
60

- 1  
2  
3 36. Townsend P, Phillimore P, Beattie A. *Health and Deprivation: Inequality and the*  
4  
5 *North*. Routledge: London; 1988.  
6
- 7 37. Office for National Statistics. Super Output Areas 2011.  
8  
9 <http://www.ons.gov.uk/ons/guide-method/geography/beginner-s-guide/census/super->  
10 [output-areas--soas-/index.html](http://www.ons.gov.uk/ons/guide-method/geography/beginner-s-guide/census/super-) Accessed August 2014.  
11  
12
- 13 38. Bruzzi P, Green SB, Byar DP, *et al*. Estimating the population attributable risk for  
14  
15 multiple risk factors using case-control data. *Am J Epidemiol* 1985, **122**:904-914.  
16  
17
- 18 39. Great Britain: Data Protection Act 1998. London: HMSO.  
19  
20 <http://www.legislation.gov.uk/ukpga/1998/29/contents> Accessed August 2014.  
21  
22
- 23 40. MRC: Policy and Guidance on Sharing of Research Data from Population and Patient  
24  
25 Studies. MRC 23rd November 2011.  
26  
27 <http://www.mrc.ac.uk/Utilities/Documentrecord/index.htm?d=MRC008302> Accessed  
28  
29 August 2014.  
30  
31
- 32 41. Wellcome Trust: Data sharing policy. Wellcome Trust August 2010.  
33  
34 <http://www.wellcome.ac.uk/About-us/Policy/Policy-and-position->  
35 [statements/WTX035043.htm](http://www.wellcome.ac.uk/About-us/Policy/Policy-and-position-) Accessed August 2014.  
36  
37  
38
- 39 42. Thiru K, Hassey A, Sullivan F. Systematic review of scope and quality of electronic  
40  
41 patient record data in primary care. *BMJ* 2003, **326**:1070.  
42  
43  
44
- 45 43. University of Bristol, Suicide Research Centre.  
46  
47 <http://www.bristol.ac.uk/psychiatry/research/suicideresearch.html> Accessed August  
48  
49 2014.  
50  
51  
52  
53  
54  
55  
56  
57  
58  
59  
60

1  
2  
3 44. The University of Manchester Centre for Suicide Prevention.

4  
5 <http://www.bbmh.manchester.ac.uk/cmhr/research/centreforsuicideprevention/>

6  
7 Accessed August 2014.

8  
9  
10 45. University of Oxford, Centre for Suicide Research. <http://cebmh.warne.ox.ac.uk/csr/>

11  
12 Accessed August 2014.

13  
14  
15 46. ISD Scotland. Scottish Suicide Information Database (ScotSID). ISD Scotland 2011.

16  
17 <http://data.gov.uk/dataset/scottish-suicide-information-database> Accessed August

18  
19 2014.  
20  
21  
22  
23  
24  
25  
26  
27  
28  
29  
30  
31  
32  
33  
34  
35  
36  
37  
38  
39  
40  
41  
42  
43  
44  
45  
46  
47  
48  
49  
50  
51  
52  
53  
54  
55  
56  
57  
58  
59  
60

1  
2  
3  
4  
5  
6  
7 **Suicide Information Database- Cymru: A protocol for a population-based, routinely**  
8 **collected data linkage ~~case-control~~ study to explore risks and patterns of healthcare**  
9 **contact prior to suicide to identify opportunities for intervention.**  
10  
11

12  
13 John A<sup>1\*</sup>, Dennis M<sup>1</sup>, Kosnes L<sup>1</sup>, Gunnell D<sup>2</sup>, Scourfield J<sup>3</sup>, Ford DV<sup>1</sup>, Lloyd K<sup>1</sup>

14  
15  
16 <sup>1</sup>College of Medicine, Swansea University, Institute of Life Sciences 2, Singleton Park,  
17 Swansea, SA2 8PP, United Kingdom.

18  
19  
20 <sup>2</sup>School of Social and Community Medicine, University of Bristol, Canynge Hall, 39  
21 Whatley Road, Bristol, BS8 2PS, United Kingdom.

22  
23  
24 <sup>3</sup>School of Social Sciences, Cardiff University, Glamorgan Building, King Edward VII  
25 Avenue, Cardiff, CF10 3WT, United Kingdom.  
26  
27  
28

29  
30  
31  
32 \*Corresponding Author: Ann John<sup>1\*</sup> [a.john@swansea.ac.uk](mailto:a.john@swansea.ac.uk); Phone: +44(0)1792 602568;  
33  
34 College of Medicine, Swansea University, Institute of Life Sciences 2, Singleton Park,  
35 Swansea, SA2 8PP, United Kingdom.  
36

37  
38 Michael Dennis<sup>1</sup> [m.s.dennis@swansea.ac.uk](mailto:m.s.dennis@swansea.ac.uk), Liv Kosnes<sup>1</sup> [l.kosnes@swansea.ac.uk](mailto:l.kosnes@swansea.ac.uk), David  
39 Gunnell<sup>2</sup> [d.j.gunnell@bristol.ac.uk](mailto:d.j.gunnell@bristol.ac.uk), Jonathan Scourfield<sup>3</sup> [Scourfield@cardiff.ac.uk](mailto:Scourfield@cardiff.ac.uk), David V.  
40 Ford<sup>1</sup> [d.v.ford@swansea.ac.uk](mailto:d.v.ford@swansea.ac.uk), Keith Lloyd<sup>1</sup> [k.r.lloyd@swansea.ac.uk](mailto:k.r.lloyd@swansea.ac.uk)  
41  
42  
43  
44

45 **Key words:** Suicide, case-control, database, routine data linkage.

46  
47 **Word Count: 4054**  
48  
49  
50  
51  
52  
53  
54

## Abstract

### Introduction

Prevention of suicide is a global public health challenge extending beyond mental health services. Linking routinely collected health and social care system data records, for the same individual across different services and over time has enormous potential in suicide research. Most previous research linking suicide mortality data with routinely collected electronic health records involves only one or two domains of health care provision such as psychiatric in-patient care. This protocol paper describes the development of a population based, routinely collected data linkage study: the Suicide Information Database (SID-Cymru). SID-Cymru aims to contribute to the information available on people who complete suicide.

### Methods and Analysis

SID-Cymru will facilitate a series of electronic case-control studies based in the Secure Anonymised Information Linkage (SAIL) Databank. We have identified 2664 cases of suicide in Wales between 2003 and 2011 from routinely collected mortality data using International Classification of Diseases, Tenth Revision, codes X60-84 (intentional self harm) and Y10-34 (undetermined intent). Each case will be matched by age and sex to at least five controls ~~who are alive at the time of death of the case~~. Records will be collated and linked from routinely collected health and social data in Wales for each individual. Conditional logistic regression will be applied to produce crude and confounder (including general practice, socioeconomic status) adjusted odds ratios.

### Ethics and Dissemination

The SAIL Databank has the required ethical permissions in place to analyse anonymised data. Ethical approval has been granted by the Information Governance Review Panel (IGRP).

Page 2 of 30

1  
2  
3  
4  
5  
6  
7 Findings will be disseminated through peer reviewed publications, consultations with  
8 stakeholders and national/ international conference presentations. The improved  
9  
10 understanding of the prior health, nature of previous contacts with services, and wider social  
11  
12 circumstances of those who complete suicide will assist in prevention policy, service  
13  
14 organisation and delivery. SID-Cymru is funded through the National Institute for Social  
15  
16 Care and Health Research, Welsh Government (RFS-12-14).  
17

Formatted: Font: Times New Roman, 12 pt

### 18 19 **Article Summary**

#### 20 21 Article Focus:

- 22  
23 • Case definitions of probable and possible suicides
- 24  
25 • Identifying risk factors and patterns of service use in those who complete suicide
- 26  
27 • Designing a study
- 28  
29
- 30

#### 31 32 Key messages:

- 33  
34 • SID-Cymru will facilitate a series of case- control studies of those who complete  
35  
36 suicide
- 37  
38 • Recency of primary care, in- and out-patient hospital and emergency department  
39  
40 contacts including attendance for self-harm, primary care diagnosis of depression,  
41  
42 levels of treatment with anti-depressants and trends in such treatment over time, rural  
43  
44 and urban geography, educational attainment, contacts for the elderly and levels of  
45  
46 physical illness will be investigated
- 47  
48 • Results will be adjusted for a number of confounders
- 49  
50

#### 51 52 Strengths and Limitations of this study:

- Based on the general population
- Includes all deaths through suicide, not just those known to mental health services
- Based on routinely collected health and social care data linkage
- Linkage across multiple domains. Most suicide data linkage studies are limited to only one or two domains of health care provision.
- Prescriptions not actual use

## Introduction

Every year approximately 800,000 people die by suicide worldwide, one to two in every 100 deaths. Prevention of suicide is a global public health challenge. Collaborative working across government departments, with a public health approach extending beyond mental health service care is essential<sup>1</sup>. Global patterns and national trends in the incidence of suicide and its key risk factors change over time. The therapeutic and preventive challenges of understanding and responding to these changes are considerable.

Vast amounts of personal data are routinely collected on a daily basis by health and social care systems around the world to support clinical management and patient care. Linking these data records, for the same individuals across different services and over time, offers a powerful, population-wide resource. Such integrated datasets have been used to study a range of health issues to identify risk and protective factors and to examine outcomes. The secondary use of these data has enormous potential in suicide research. Improved consideration of the prior health, wider social circumstances and points of access to services of all individuals who complete suicide can be achieved.<sup>2-4</sup>

Studies from the Nordic countries, have demonstrated the usefulness of data-linkage across register based studies in suicide research.<sup>5-10</sup> Others<sup>11-13</sup> have demonstrated that collating and linking sets of routinely collected whole population based data, such as GP records, out-patient data, in-patient activity, with mortality data enable more detailed analysis of risk factors for those people completing suicide. Most previous research linking suicide mortality data with routinely collected electronic health records involves only one or two domains of health care provision such as psychiatric in-patient care.

1  
2  
3  
4  
5  
6  
7 In the United Kingdom various systems exist to examine suicide deaths. The National  
8 Confidential Inquiry into Suicide and Homicide (NCISH) by people with Mental Illness  
9 focuses on suicide cases that were in contact with mental health services (approximately 25%  
10 of total) in the year prior to their deaths.<sup>3</sup> However this provides limited information on  
11 issues of suicide in the general population and may hamper the effectiveness of wider  
12 preventive efforts.<sup>1</sup> In a recent report NCISH<sup>14</sup> examined aspects of primary healthcare prior  
13 to all suicides in England between 2002-2011; however no linkage was made with data from  
14 other service providers such as emergency departments.  
15  
16  
17  
18  
19  
20  
21

22 Scotland has recently established enhanced data collection in relation to suicide, however,  
23 further development is needed in order for 'ScotSID' to be able to examine healthcare  
24 pathways and contact with more than one health service;<sup>15</sup> England does not currently have a  
25 dedicated repository for suicide data though studies have made use of the Clinical Practice  
26 Research Datalink (CPRD; [www.cprd.com](http://www.cprd.com)), which represents approximately 8.5% of the UK  
27 population from 600 General Practices (GP's) in England.<sup>16</sup> CPRD can be linked with data  
28 from the National Health Service (NHS) Hospital Episode Statistics (HES;  
29 <http://www.hscic.gov.uk>) and mortality data from the Office of National Statistics (ONS;  
30 <http://www.ons.gov.uk>) but has limited emergency department data.  
31  
32  
33  
34  
35  
36  
37  
38  
39

40 SID-Cymru will access and link information on prior health, nature of previous contacts with  
41 services, and wider social circumstances of all those who complete suicide (known and  
42 unknown to mental health services) within the population of Wales via anonymised routinely  
43 collected electronic data held in healthcare and social datasets from the Secure Anonymised  
44 Information Linkage (SAIL) Databank ([www.saildatabank.com](http://www.saildatabank.com)).<sup>17 18</sup> This brings together,  
45 links and anonymises the widest possible range of person-based data currently available in  
46  
47  
48  
49  
50  
51  
52  
53  
54  
55  
56  
57  
58  
59  
60

1  
2  
3  
4  
5  
6  
7 the UK. The SAIL Databank was originally set up by the Health Information Research Unit  
8 (HIRU) at the College of Medicine at Swansea University.  
9

10  
11 SID-Cymru is part of the research programme related to the Health e-Research Collaboration  
12 UK (HeRC UK), led by the Medical Research Council (MRC) and based in the Centre for the  
13 Improvement of Population Health through e-Records Research (CIPHER). CIPHER is a UK  
14 Clinical Research Collaboration (UKCRC) Public Health Research Centre of Excellence set  
15 within the College of Medicine at Swansea University. SID-Cymru will provide timely robust  
16 data to inform the future strategic direction of and the first step in designing and evaluating  
17 effective interventions to prevent suicide. It will use the International Classification of  
18 Disease, Tenth Revision,<sup>19</sup> (ICD-10) definitions and instructions for classifying causes of  
19 death which will allow for comparisons with other countries and thus support research of  
20 relevance globally. An emphasis will be given to issues where there are opportunities for  
21 intervention or where electronic data linkage confers an advantage to its investigation.  
22  
23  
24  
25  
26  
27  
28  
29  
30  
31

### 32 33 **Aim**

34  
35 The main aim is to establish a Suicide Information Database- Cymru as a population based  
36 resource for studying factors and service contacts associated with all suicide deaths through  
37 routinely collected data linkage case control studies.  
38  
39  
40

### 41 42 **Objectives:**

#### 43 44 *Phase 1:*

- 45  
46  
47 ▪ To identify, via the SAIL Databank, all those with ICD-10 codes for probable and  
48 possible suicide in Wales 2003-2011, and matched controls.  
49  
50  
51  
52  
53  
54

- 1  
2  
3  
4  
5  
6  
7  
8  
9  
10  
11  
12
- To explore and address the methodological issues relating to the development of this database of completed suicides and the linkage of data across different datasets and settings.

13  
14

*Phase 2:*

- 15  
16  
17  
18  
19  
20  
21  
22  
23  
24  
25  
26  
27
- To investigate risk factors and trends for suicide including: primary care diagnosis of depression; levels of treatment with anti-depressants and trends in such treatment over time; rural and urban geography; educational attainment; levels of physical illness.
  - To investigate settings and pathways of care where people are in contact with services in the year leading up to their suicide across the whole population and in specific groups such as the elderly.

28  
29

**Methods and Analyses**

30  
31  
32

*Design*

33  
34  
35  
36  
37  
38  
39  
40  
41  
42

SID-Cymru will facilitate a series of electronic population based, routinely collected data linkage case-control studies on completed suicide in Wales between 2003 and 2011. Wales has a population of 3.1 million<sup>20</sup> and is part of the United Kingdom. There are approximately 32,000 deaths of Welsh nationals registered each year of which around 300 (approximately 1%) are registered as suicides.<sup>21</sup>

43  
44  
45

*Data Source*

46  
47  
48  
49  
50  
51  
52  
53  
54

SID-Cymru will be assembled within the SAIL Databank,<sup>17</sup> a growing resource that already holds over a billion anonymised records from 13 databases which can be anonymously linked at the individual record level.<sup>18</sup> The SAIL Databank has been previously used for linkage of routine data.<sup>22-26</sup>

1  
2  
3  
4  
5  
6  
7 Within the SAIL Databank a split-file approach to anonymisation is used to overcome issues  
8 of confidentiality and disclosure in health-related data warehousing.<sup>18</sup> Demographic data are  
9 sent to a partner organisation, NHS Wales Information Service (NWIS), where all identifiable  
10 information is removed; clinical data are sent directly to HIRU, where, for each dataset  
11 within the SAIL Databank, an individual is assigned an encrypted Anonymised Linking Field  
12 (ALF). The ALF is used to link anonymised individuals across datasets, thus supporting the  
13 opportunity to conduct longitudinal analyses of an individual's journey through multiple  
14 health, education and social datasets.<sup>17</sup> Additionally Residential Anonymised Linking Fields  
15 (RALFs) have been created for all residences in Wales and enables linkage of anonymised  
16 household and environment data with the health records of individual residents without the  
17 identity of the residences or residents being known to researchers.<sup>26</sup>

18  
19  
20  
21  
22  
23  
24  
25  
26  
27  
28  
29 *The primary study base* will be the Welsh Demographic Service<sup>27</sup> (WDS) hosted within the  
30 SAIL Databank. The WDS is a core dataset available within the SAIL Databank and part of a  
31 set of services to manage administrative information (demographic data) for NHS patients in  
32 Wales. The WDS was introduced early in 2009 replacing a similar service known as the NHS  
33 Wales Administrative Register (NHS AR). The WDS data is collected from GP practices via  
34 the Exeter System and more than five million individuals are currently present in the WDS  
35 dataset within the SAIL Databank. The WDS is a register of all individuals that have at some  
36 point in time been registered with a Welsh General Practitioner (GP) or required some form  
37 of NHS health care provision in Wales. The electronic collation of WDS / NHS AR data  
38 originated in 1960 and is updated and maintained by NWIS,<sup>27</sup> ensuring that address changes  
39 (within and out of Wales) and death notices are included in the register. The original (non-  
40 anonymised) version of the NHS AR has been used in the HIRU Matching Algorithm for  
41 Consistent Results in Anonymised Linkage (MACRAL), making the WDS / NHS AR the  
42  
43  
44  
45  
46  
47  
48  
49  
50  
51  
52  
53

1  
2  
3  
4  
5  
6  
7 master list for all Welsh residents and using probabilistic matching to find the associated  
8 NHS numbers that are then encrypted into ALF's.  
9

10  
11 Deaths in Wales should be registered within five days of the date of death. However  
12 legislation in Wales means that when a coroner's inquest takes place, the death cannot be  
13 registered until the inquest is complete. Since the Office for National Statistics (ONS), the  
14 national agency where all deaths are collated, has no conclusive information about the death  
15 until it is registered, there is a delay between the date the death occurred and when the death  
16 is added to the annual ONS mortality dataset. The ONS found that less than 41% of deaths  
17 going to inquest were registered within 3 months, though 96% were registered within 1  
18 year.<sup>28</sup> Thus precise information on the annual incidence of suicide may be delayed by up to  
19 two years. Information collected at death registration is recorded on the Registration Online  
20 system by registrars. Most of the information is normally supplied by the informant (usually a  
21 close relative of the deceased) while the cause of death (COD) is usually obtained from the  
22 Medical Certificate of Cause of Death (MCCD) completed by a medical practitioner when  
23 the death is certified using ICD-10 coding or the coroner if there is an inquest.<sup>19</sup> Notably, a  
24 death is not officially registered within the Annual District Deaths Extract (ADDE) until the  
25 COD has been finalised, and thus the year of death and the year of registration may not  
26 concur. The *primary dataset* used to construct SID-Cymru is the ADDE from the ONS. The  
27 ADDE is inclusive of Welsh residents who died outside of Wales, and holds information  
28 about COD derived from death certificates on all deaths in Wales.  
29  
30  
31  
32  
33  
34  
35  
36  
37  
38  
39  
40  
41  
42  
43  
44  
45

#### 46 *Definition of Suicide for Cases*

47

48  
49 The true number of suicides is difficult to determine because a coroner's conclusion of  
50 suicide must be 'beyond a reasonable doubt' i.e. that the death was intentionally self inflicted  
51 and in some areas coroners have increasingly (since 2001) reported narrative conclusions  
52  
53  
54

1  
2  
3  
4  
5  
6 rather than reporting it as suicide.<sup>29 30</sup> Previously when insufficient information was recorded  
7  
8 by the coroner ONS coders used to record the death as an accident which inevitably led to  
9  
10 some suicides being classified as accidents or misadventure. The ONS has recently issued  
11  
12 guidance on this issue following a coding practice review.<sup>31</sup> Current ONS practice includes  
13  
14 deaths where intention is ‘undetermined whether accidentally or purposefully inflicted’; thus  
15  
16 deaths where there may be no intention to take life, such as in relation to injury or poisoning,  
17  
18 are included in suicide figures by ONS. Currently there is no access to coroners’ narrative  
19  
20 verdicts within the SAIL Databank as a possible method for review of case inclusion.  
21

22  
23 There is evidence to suggest that a high proportion of deaths from poisoning and hanging that  
24  
25 receive accidental verdicts, are found, when subjected to clinical review, to be suicides.<sup>32</sup>  
26  
27 Such possible deaths through suicide will be included in SID-Cymru as an opportunity for  
28  
29 further separate and combined analysis; thus the additional ICD-10 codes relating to  
30  
31 ‘accidental poisoning with prescribed drugs’ (X40-X41, X43-X49) and ‘accidental hanging’  
32  
33 (W75-W76) may be used along with ‘sequelae of external causes of morbidity and mortality’  
34  
35 (Y87, Y87.2, Y89, Y89.9).<sup>18</sup> Thus with SID-Cymru we aim to establish a Suicide  
36  
37 Information Database that can be a resource for studying factors associated with *all*  
38  
39 probable, as well as, possible deaths through suicide; by including accidental  
40  
41 hanging/strangulation and accidental poisoning, excluding, narcotics and psychodysleptics  
42  
43 (i.e., possible suicides), along with the ONS traditional method of defining suicides, which  
44  
45 includes suicides and deaths of undetermined intent (probable suicides).<sup>2</sup>  
46

#### 47 *Identification of Cases and Controls*

48  
49 SID-Cymru cases encompass suicides (‘intentional self-harm’ [ICD-10: X60-84]) and  
50  
51 probable deaths through suicide (‘undetermined intent’ [ICD-10: Y10-34, excl.Y33.9])  
52  
53 recorded from the MCCD and presented within ADDE as the underlying COD. Those coded  
54  
55  
56  
57  
58  
59  
60

1  
2  
3  
4  
5  
6  
7 Y33.9/U50.9 (pending verdicts) are excluded since a large proportion of these are  
8 subsequently found to be homicides. Probable suicide defined above can be supplemented  
9 with possible deaths through suicide if required. Cases of probable suicide will be identified  
10 and extracted by use of the ICD-10 codes<sup>19</sup> defined above and depicted in Table 1.  
11  
12  
13

14  
15  
16 ONS figures include those over 15 years of age only, due to the possibility that deaths in  
17 younger children coded as undetermined events may be caused by unverifiable accidents,  
18 neglect or abuse.<sup>33</sup> SID-Cymru will allow for the analysis of suicides and probable suicides  
19 for the 10 to 14 year age band. Official ONS mortality statistics are produced based on the  
20 number of deaths registered in a particular calendar year, rather than the number of deaths  
21 that occurred in that year. This means their figures include some deaths that occurred in years  
22 prior to the reference year (approximately 4%). As SID-Cymru will link and review data in  
23 the period leading up to death it is important to ensure the match/end date reflects the correct  
24 time period (specific to each individual case), i.e. date of death not date of registration, to  
25 afford an accurate perspective on utilisation of resources and help seeking behaviours.  
26 Consequently the actual date of death (ADOD) will be used in the matching criteria to  
27 establish a data review 'end date' for controls, rather than the registered date of death  
28 (RDOD) referred to in ONS reports. Mortality data within the SAIL Databank is only  
29 available from 2003, thus the earliest case inclusion relates to ADOD's from the 1st January  
30 2003. To minimise the underestimation of cases identified (i.e., due to delays in COD  
31 confirmation and registration of DOD) the case inclusion for SID-Cymru includes cases aged  
32 10 years and over at ADOD, where the ADOD took place between 01/01/2003 and 31/12/  
33 2011.  
34  
35  
36  
37  
38  
39  
40  
41  
42  
43  
44  
45  
46  
47  
48  
49  
50  
51  
52  
53  
54  
55  
56  
57  
58  
59  
60

1  
2  
3  
4  
5  
6  
7  
8  
9  
10  
11  
12  
13  
14  
15  
16  
17  
18  
19  
20  
21  
22  
23  
24  
25  
26  
27  
28  
29  
30  
31  
32  
33  
34  
35  
36  
37  
38  
39  
40  
41  
42  
43  
44  
45  
46  
47  
48  
49

**Table 1.** ICD-10 codes used to identify and extract cases with death through probable suicide for SID-Cymru.

| Short name                            | Description                                                                                        | ICD10 codes                   |
|---------------------------------------|----------------------------------------------------------------------------------------------------|-------------------------------|
| Poisoning                             | Poisoning by and exposure to one or more types of poisons                                          | X60-X69, Y10-Y19              |
| Hanging & suffocation                 | Hanging, strangulation and suffocation                                                             | X70, Y20                      |
| Drowning                              | Drowning and submersion                                                                            | X71, Y21                      |
| Guns                                  | Firearm discharge                                                                                  | X72-X74, Y22-Y24              |
| Sharp object                          | Sharp object                                                                                       | X78, Y28                      |
| Jumping from a high place             | Jumping from a high place                                                                          | X80, Y30                      |
| Jumping or lying before moving object | Jumping or lying before moving object                                                              | X81, Y31                      |
| Explosives & Fire                     | Explosive material, smoke, fire, flames and hot objects                                            | X75-X77, Y25-Y27              |
| Other or unspecified events           | Intentional self-harm by other/un- specified means; Other/un- specified events undetermined intent | X83-X84, Y33-Y34 (excl.Y33.9) |
| Crash by motor vehicle                | Crashing of motor vehicle intentional and undetermined intent                                      | X82, Y32                      |
| Blunt Object                          | Blunt Object                                                                                       | X79, Y29                      |

Table 2 presents the number of registered deaths through suicide per year and actual deaths per year between 2003 and 2011 as reported by the ONS and as identified for SID-Cymru within the SAIL Databank.

**Table 2.** Probable Suicide<sup>1</sup> Deaths for Wales 2003 – 2011 identified within the SAIL Databank for SID-Cymru.

| Count by Year <sup>2</sup>                                       | 2003 | 2004 | 2005 | 2006 | 2007 | 2008 | 2009 | 2010 | 2011 | TOTAL       |
|------------------------------------------------------------------|------|------|------|------|------|------|------|------|------|-------------|
| <b>Probable Suicides ADOD<sup>3</sup> within SID<sup>4</sup></b> | 361  | 303  | 287  | 278  | 279  | 282  | 272  | 292  | 304  | <b>2664</b> |
| <b>Probable Suicides RDOD<sup>5</sup> within SID</b>             | 274  | 330  | 270  | 300  | 288  | 266  | 257  | 287  | 340  | <b>2612</b> |
| <b>ONS Probable Suicides<sup>6</sup> RDOD</b>                    | 332  | 330  | 269  | 300  | 289  | 266  | 258  | 288  | 341  | <b>2673</b> |

<sup>1</sup>Probable suicides = ICD-10 codes for Intentional [X60-84], Undetermined [Y10-34 excl.Y33.9] self-harm;

<sup>2</sup>Values are number of individuals unless otherwise indicated <sup>3</sup>ADOD = Year death occurred; <sup>4</sup>Cases identified for SID-Cymru includes those aged 10 years and over; <sup>5</sup>RDOD = Year death was registered; <sup>6</sup>Cases reported by the ONS include those aged 15 years and over.

*Matched Controls* will be identified within the WDS as live individuals matched on age (to the nearest year) and gender who were registered within the WDS for at least one year prior to matched case's ADOD. The controls will be required to be alive at the time of the matched case's ADOD (i.e., the match/end date). The use of live controls limits the introduction of bias relating to deaths, particularly in the younger age groups, of those undertaking risky behaviours resulting in premature death (e.g. substance use, accidents) that may be associated with unrecognised suicidal behaviours or known risk factors. To add to the power of the study we aim to identify at least five controls to every one case.<sup>34</sup>

1  
2  
3  
4  
5  
6  
7 *Routine Data Sources*  
8

9 For SID-Cymru the data collected on identified cases and controls, via ADDE and the WDS  
10 respectively, will be linked to other routinely collected datasets, retrospectively allowing a  
11 review of each individual's pathway through the various services. Linkage with, for example,  
12 GP system data provides varying information about patients going back several years,  
13 including previous diagnosis, presenting symptoms and previous medications prescribed.  
14 This dataset can be used to review contacts with the GP and, consequently, infer the  
15 development / diagnosis of any new medical conditions including depression and self harm  
16 prior to suicide. Linkage with in-patient data will allow a review of hospital contacts and  
17 Emergency Department datasets will give information on crisis contacts. This will provide  
18 comprehensive insights into help seeking behaviours and management across settings. Data  
19 sets currently accessible via the SAIL Databank which will be linked to SID-Cymru are  
20 presented in Table 3. There are several other datasets currently under negotiation for  
21 inclusion within the SAIL Databank to which, in the future, SID-Cymru could link. These  
22 include Department of Work and Pensions (DWP) employment and incapacity status, Looked  
23 After Children, fostering, Substance Misuse Services, Sexually Transmitted Infections and  
24 Police Data.  
25  
26  
27  
28  
29  
30  
31  
32  
33  
34  
35  
36  
37  
38  
39  
40  
41  
42  
43  
44  
45  
46  
47  
48  
49  
50  
51  
52  
53  
54  
55  
56  
57  
58  
59  
60

**Table 3.** Datasets available within the SAIL Databank for linkage with SID-Cymru cases and controls.

| Dataset                                   | Data Description                                                                                                                                                                                                                                                                                       | Data Provider                                                                        | Data Type                              | Geographical Coverage | Available from |
|-------------------------------------------|--------------------------------------------------------------------------------------------------------------------------------------------------------------------------------------------------------------------------------------------------------------------------------------------------------|--------------------------------------------------------------------------------------|----------------------------------------|-----------------------|----------------|
| Annual District Death Extract (ADDE)      | Register of all deaths relating to Welsh residents, including those that died out of Wales.                                                                                                                                                                                                            | NHS Wales' Informatics Service (NWIS)/ Health Solutions Wales (HSW) on behalf of ONS | Registry data                          | Wales                 | 2003           |
| Welsh Demographic Service (WDS)           | Administrative information about individuals in Wales that use NHS services; such as address and practice registration history. It replaced the NHS Wales Administrative Register (NHSAR) in 2009.                                                                                                     | NHS Wales' Informatics Service (NWIS)/ HSW                                           | Administrative (mandatory) data return | Wales                 | 1990           |
| Area Based Deprivation Scores             | Lower Super Output Area - Townsend Deprivation Index and Welsh Index of Multiple Deprivation Scores.                                                                                                                                                                                                   | NHS Wales' Informatics Service (NWIS)/ HSW                                           | Administrative data                    | Wales                 | 2001 / 2005    |
| Education Attainment (DCEL)               | Educational attainment at key stages (pre 16 year old). Data collated from school census, the national pupil survey and educational attainment databases by the Welsh Government.                                                                                                                      | Department for Children, Education, Lifelong Learning and Skills (DCELLS)            | Administrative / survey data.          | Wales                 | 2005           |
| Primary Care GP dataset                   | Each GP practice uses a clinical information system to maintain an electronic health record for each of their patients; capturing the signs, symptoms, test results, diagnoses, prescribed treatment, referrals for specialist treatment and social aspects relating to the patients home environment. | Welsh General Practices that have signed up to the SAIL Databank                     | Clinical system data                   | Wales                 | 2000           |
| Patient Episode Database for Wales (PEDW) | NHS Wales - hospital admissions (Inpatients and day cases) dataset comprising of attendance and clinical information for all hospital admissions: includes diagnoses and operations performed.                                                                                                         | NHS Wales' Informatics Service (NWIS)/ Health Solutions Wales (HSW)                  | Administrative (mandatory) data return | Wales                 | 1997           |
| Outpatient Dataset (OPD)                  | Attendance information for all NHS Wales hospital outpatient appointments.                                                                                                                                                                                                                             | NHS Wales' Informatics Service (NWIS)/ Health Solutions Wales (HSW)                  | Administrative (mandatory) data return | Wales                 | 2004           |
| Emergency Department Data Set (EDDS)      | Administrative and clinical information for all NHS Wales Accident and Emergency department attendances. Includes the All Wales Injury Surveillance Systems (AWISS) dataset                                                                                                                            | NHS Wales' Informatics Service (NWIS)/ Health Solutions Wales (HSW)                  | Administrative (mandatory) data return | Wales                 | 2009           |

## Measurements

### *Data Variables/Characteristics*

Data to be included in SID-Cymru will be extracted from the SAIL Databank and will include basic demographics; educational data; ADOD and RDOD; numbers and percentages for deprivation; proportions known to different healthcare settings in the period prior to death; inclusive medical history, i.e., primary care contact and diagnosis (by Read Codes), information about hospital / psychiatric admission and diagnosis (by ICD-10 Codes), and nature of service contact e.g. for self-harm, substance misuse. Therefore, the routinely collected data held by the NHS and other public bodies supplying the existing SAIL Databank will maximise the narrative of a death through suicide while being less resource intensive than psychological autopsies. The initial variables to be extracted and linked across data sets are described in Table 4.

### Planned Analyses

The primary objective is to establish SID-Cymru as a resource for future analysis. It is important to maximise the utility of the resource, and some general principles of analysis have been determined.

### Descriptive Epidemiology

#### *Phase 1:*

- Identification and description of Cases: Number of deaths registered with ONS and available within the SAIL Databank, with relevant ICD-10 codes defined as suicides, between 2003-2011.

**Table 4.** Characteristics to be identified and collected through data linkage for SID-Cymru Cases and Controls.

| <b>Data</b>            | <b>Characteristics</b>                                                                                                                                                                                                                                                    |
|------------------------|---------------------------------------------------------------------------------------------------------------------------------------------------------------------------------------------------------------------------------------------------------------------------|
| <b>Demographics</b>    | Sex<br>Date of Birth<br>Marital status*<br>Employment*<br>Education*                                                                                                                                                                                                      |
| <b>Mortality</b>       | Date of Death,<br>Age at DOD (in years)<br>Registered Date of Death<br>Cause of Death (ICD-10 code)                                                                                                                                                                       |
| <b>Deprivation</b>     | LSOA<br>WIMD<br>Townsend<br>Rural-Urban Indicators                                                                                                                                                                                                                        |
| <b>Medical History</b> | GP register*<br>GP diagnosis (Read code)*<br>GP events*<br>Hospital attendance<br>Hospital diagnosis<br>Hospital events<br>Outpatient attendance<br>Outpatient diagnosis*<br>Outpatient events<br>ED attendance*<br>ED diagnosis*<br>ED events*<br>Psychiatric Admission* |

\* Where data are available; there may be limitations to the number of cases with this information.

- Identification and description of Matched Controls.
- Basic demographics.
- Table of delay (days) in registering suicides and undetermined deaths.

*Phase 2:*

- Proportions known to different healthcare settings: number and percentages, with main diagnosis, that had a general hospital admission; emergency department contact for self-harm and other indications; psychiatric admission and primary care contact in the year prior to probable suicide.
- Numbers and percentages for deprivation, employment status, educational achievement and medical history (e.g., chronic pain, terminal illness, medication, previous self harm, and substance misuse) will also be sought.
- Number of cases with missing data across data sets for variables of interest will be noted.

**Area based measures of socio-economic deprivation**

Deprivation will be measured at Lower Super Output Area (LSOA) level using the Welsh Index of Multiple Deprivation<sup>35</sup> (WIMD) and Townsend Index Score.<sup>36</sup> All suicides and matched controls will be assigned to a lower layer super output area (LSOA). There are 1909 LSOAs in Wales with an average population of 1500 people (range: 1000-3000).<sup>37</sup> Linkage to WIMD and Townsend Index information is available in the SAIL Databank. These will be ranked for deprivation, divided into quintiles and standardised rates calculated.

**Odds ratios for the described exposures in the case control study**

1  
2  
3  
4  
5  
6  
7 A case-control study utilising SID-Cymru will be population based and so the relative risk of  
8 suicide will be estimated by conditional logistic regression model with SPSS (version 20).  
9  
10 Crude odds ratios will be adjusted for general practice and/or LSOA by matching cases and  
11 controls. Unadjusted estimates, confounder-adjusted estimates and their precision (e.g., 95%  
12 confidence interval) will be produced. Interactions between variables will be assessed with  
13  
14 the log likelihood ratio test based on results from the adjusted analysis. The population  
15  
16 attributable risk will be calculated<sup>38</sup> on the basis of adjusted relative risks from the full  
17  
18 analysis and the distribution of exposures in the cases.  
19  
20

21  
22 We will also report information on the completeness of linkage with each dataset.  
23  
24

## 25 **Ethics and Dissemination**

### 26 *Ethics*

27  
28  
29 A large amount of preliminary work on anonymisation methodologies was undertaken to  
30  
31 create the SAIL Databank system,<sup>17- 18</sup> and the SAIL Databank has the required ethical  
32  
33 permissions and processes in place to analyse anonymised data. It operates within a robust  
34  
35 series of guidelines in line with the Caldicott principles and the National Information  
36  
37 Governance Board for Health and Social Care.<sup>18</sup> Ethical approval has been granted for SID-  
38  
39 Cymru from HIRU's Information Governance Review Panel (IGRP), an independent body  
40  
41 consisting of a range of government, regulatory and professional agencies. In compliance  
42  
43 with the IGRP rulings and the Data Protection Act 1998<sup>39</sup> individual level data and personal  
44  
45 identifier linkage codes will not be removed from the SAIL Databank and all analyses will be  
46  
47 carried out within the SAIL Databank gateway at Swansea University, a secure access point  
48  
49 to data within the SAIL Databank. The key points of the MRC/Wellcome Trust data sharing  
50  
51 policy will be followed.<sup>40 41</sup>  
52  
53

### Dissemination

This paper describes the protocol for the development of a Suicide Information Database (SID-Cymru), and the research opportunities available from an electronic case-control study of suicides within a whole population. SID-Cymru will have the ability to link suicide cases anonymously to primary and secondary health information along with other social care data, allowing us to review each case's journey through these datasets. The establishment of SID-Cymru and exploration of the linkage methodologies will improve our understanding of those who complete suicide (particularly those not known to mental health services) and will be used to inform service planning and policy decision making and implementation. It will help identify key opportunities and settings for prevention of this tragic event. By so doing, SID-Cymru will join other international databases of suicide research and provide a platform for further investigation and data linkages.

In order for SID-Cymru to become a functional resource it is important to be aware of the limits of health data available; though widely used in research, and offering a broad range of information about treatment and associated conditions, there are issues relating to determining the quality of patient records, the completeness of data available and any conclusions that may be drawn from them, perhaps particularly concerning primary care records.<sup>42</sup> That is, working with routinely collected data presented in its "raw" format requires a certain level of database analysis skills where duplicates, missing and erroneous entries are common occurrences. Whilst some such administrative / system-based recording issues are easy to identify and account for in individual datasets, it is not always apparent what is correct and what is erroneous at the combined level. Indeed, this problem is confounded when linkage of data reveals conflicting information causing routine data to appear inaccessible and attempts at linkage discouraged. Thus, a secondary aim for SID-Cymru is to share the skills developed as part of establishing a suicide database, which can

1  
2  
3  
4  
5  
6  
7 aid colleagues who may lack such analytical expertise and foster greater multi-disciplinary  
8 collaborations and advance suicide research.  
9

10  
11 The UK has a strong presence in form of a wide range of publications and expertise relating  
12 to suicide research. Successful and dedicated Suicide Research Centres exist in Bristol,  
13 Manchester and Oxford,<sup>43-45</sup> and Scotland recently commenced work on a Scottish Suicide  
14 Information Database ('ScotSID').<sup>46</sup> These centres of excellence report broadly about suicide,  
15 though for logistical reasons, often a regional focus is retained, relating to project funding,  
16 analytical and interventional work; for that reason the establishment of a Suicide Information  
17 Database in Wales will build on and enhance existing UK suicide resources and infrastructure  
18 since the level of linkage available within the SAIL Databank is unique in this field. Unique  
19 opportunities within the SAIL Databank include linkage across primary, secondary and  
20 emergency department data and with education data. Findings will be disseminated through  
21 publications in peer reviewed journals and presentations at local, national and international  
22 conferences. Communication and consultation with key stakeholders from health and social  
23 care (for example primary care, mental health, Royal Colleges), government and other policy  
24 makers, as well as, the third sector will occur. Dissemination will be facilitated by the wider  
25 roles and responsibilities in suicide prevention, nationally and internationally, of members of  
26 the research team.  
27  
28  
29  
30  
31  
32  
33  
34  
35  
36  
37  
38  
39  
40  
41  
42

Formatted: Font: Times New Roman, 12 pt

### 43 **Implications and Significance**

44  
45 Valuable opportunities exist for a wide range of epidemiological and clinical studies on  
46 suicide in Wales and SID-Cymru has the potential to become an important resource in  
47 facilitating such research which will be of relevance internationally. In addition to the records  
48 that have already been included for linkage with SID-Cymru it is expected that over time  
49 relevant information from other data sources (e.g. the DWP) will be linked to SID-Cymru to  
50  
51  
52  
53  
54

1  
2  
3  
4  
5  
6  
7 provide a wider range of information on issues such as individuals' circumstances, the nature  
8 of their deaths, and their contact with extended services. Additionally, linkage can be made  
9 with non-routinely collected datasets such as that held by NCISH. Specific hypotheses that  
10 will be explored include: recency of primary care, hospital and emergency department  
11 contacts including attendance for self-harm, primary care diagnosis of depression, levels of  
12 treatment with anti-depressants and trends in such treatment over time, rural and urban  
13 geography, contacts for the elderly and levels of physical illness.

14  
15  
16 Findings of current and projected public health importance will be assessed and presented to  
17 support policy makers, commissioners and providers of health and social care in Wales. Non-  
18 identifiable information from this project will be made available to researchers in Wales, the  
19 UK and international collaborators. The initial project focus will be on identification of cases  
20 and controls, data linkage opportunities and methodological issues relating to the  
21 establishment of a Suicide Information Database and routine data linkage (Phase 1), before  
22 commencing data extraction and analysis (Phase 2). The proposed data collation and linkage  
23 of primary, secondary and emergency department health information together with  
24 educational data are currently unique in the United Kingdom. ~~ThusDue to existing routine~~  
25 ~~data linkages within the SAIL Databank~~<sup>17</sup> it is possible to develop a central repository for  
26 information relating to suicide in whole population that will be of relevance internationally.  
27 This paper describes the design and development of a Suicide Information Database in its  
28 infancy.

#### 29 30 31 **Authors' contributions**

32  
33  
34  
35  
36  
37  
38  
39  
40  
41  
42  
43  
44  
45  
46  
47  
48  
49  
50  
51  
52  
53  
54  
55  
56  
57  
58  
59  
60  
61  
62  
63  
64  
65  
66  
67  
68  
69  
70  
71  
72  
73  
74  
75  
76  
77  
78  
79  
80  
81  
82  
83  
84  
85  
86  
87  
88  
89  
90  
91  
92  
93  
94  
95  
96  
97  
98  
99  
100  
101  
102  
103  
104  
105  
106  
107  
108  
109  
110  
111  
112  
113  
114  
115  
116  
117  
118  
119  
120  
121  
122  
123  
124  
125  
126  
127  
128  
129  
130  
131  
132  
133  
134  
135  
136  
137  
138  
139  
140  
141  
142  
143  
144  
145  
146  
147  
148  
149  
150  
151  
152  
153  
154  
155  
156  
157  
158  
159  
160  
161  
162  
163  
164  
165  
166  
167  
168  
169  
170  
171  
172  
173  
174  
175  
176  
177  
178  
179  
180  
181  
182  
183  
184  
185  
186  
187  
188  
189  
190  
191  
192  
193  
194  
195  
196  
197  
198  
199  
200  
201  
202  
203  
204  
205  
206  
207  
208  
209  
210  
211  
212  
213  
214  
215  
216  
217  
218  
219  
220  
221  
222  
223  
224  
225  
226  
227  
228  
229  
230  
231  
232  
233  
234  
235  
236  
237  
238  
239  
240  
241  
242  
243  
244  
245  
246  
247  
248  
249  
250  
251  
252  
253  
254  
255  
256  
257  
258  
259  
260  
261  
262  
263  
264  
265  
266  
267  
268  
269  
270  
271  
272  
273  
274  
275  
276  
277  
278  
279  
280  
281  
282  
283  
284  
285  
286  
287  
288  
289  
290  
291  
292  
293  
294  
295  
296  
297  
298  
299  
300  
301  
302  
303  
304  
305  
306  
307  
308  
309  
310  
311  
312  
313  
314  
315  
316  
317  
318  
319  
320  
321  
322  
323  
324  
325  
326  
327  
328  
329  
330  
331  
332  
333  
334  
335  
336  
337  
338  
339  
340  
341  
342  
343  
344  
345  
346  
347  
348  
349  
350  
351  
352  
353  
354  
355  
356  
357  
358  
359  
360  
361  
362  
363  
364  
365  
366  
367  
368  
369  
370  
371  
372  
373  
374  
375  
376  
377  
378  
379  
380  
381  
382  
383  
384  
385  
386  
387  
388  
389  
390  
391  
392  
393  
394  
395  
396  
397  
398  
399  
400  
401  
402  
403  
404  
405  
406  
407  
408  
409  
410  
411  
412  
413  
414  
415  
416  
417  
418  
419  
420  
421  
422  
423  
424  
425  
426  
427  
428  
429  
430  
431  
432  
433  
434  
435  
436  
437  
438  
439  
440  
441  
442  
443  
444  
445  
446  
447  
448  
449  
450  
451  
452  
453  
454  
455  
456  
457  
458  
459  
460  
461  
462  
463  
464  
465  
466  
467  
468  
469  
470  
471  
472  
473  
474  
475  
476  
477  
478  
479  
480  
481  
482  
483  
484  
485  
486  
487  
488  
489  
490  
491  
492  
493  
494  
495  
496  
497  
498  
499  
500  
501  
502  
503  
504  
505  
506  
507  
508  
509  
510  
511  
512  
513  
514  
515  
516  
517  
518  
519  
520  
521  
522  
523  
524  
525  
526  
527  
528  
529  
530  
531  
532  
533  
534  
535  
536  
537  
538  
539  
540  
541  
542  
543  
544  
545  
546  
547  
548  
549  
550  
551  
552  
553  
554  
555  
556  
557  
558  
559  
560  
561  
562  
563  
564  
565  
566  
567  
568  
569  
570  
571  
572  
573  
574  
575  
576  
577  
578  
579  
580  
581  
582  
583  
584  
585  
586  
587  
588  
589  
590  
591  
592  
593  
594  
595  
596  
597  
598  
599  
600  
601  
602  
603  
604  
605  
606  
607  
608  
609  
610  
611  
612  
613  
614  
615  
616  
617  
618  
619  
620  
621  
622  
623  
624  
625  
626  
627  
628  
629  
630  
631  
632  
633  
634  
635  
636  
637  
638  
639  
640  
641  
642  
643  
644  
645  
646  
647  
648  
649  
650  
651  
652  
653  
654  
655  
656  
657  
658  
659  
660  
661  
662  
663  
664  
665  
666  
667  
668  
669  
670  
671  
672  
673  
674  
675  
676  
677  
678  
679  
680  
681  
682  
683  
684  
685  
686  
687  
688  
689  
690  
691  
692  
693  
694  
695  
696  
697  
698  
699  
700  
701  
702  
703  
704  
705  
706  
707  
708  
709  
710  
711  
712  
713  
714  
715  
716  
717  
718  
719  
720  
721  
722  
723  
724  
725  
726  
727  
728  
729  
730  
731  
732  
733  
734  
735  
736  
737  
738  
739  
740  
741  
742  
743  
744  
745  
746  
747  
748  
749  
750  
751  
752  
753  
754  
755  
756  
757  
758  
759  
760  
761  
762  
763  
764  
765  
766  
767  
768  
769  
770  
771  
772  
773  
774  
775  
776  
777  
778  
779  
780  
781  
782  
783  
784  
785  
786  
787  
788  
789  
790  
791  
792  
793  
794  
795  
796  
797  
798  
799  
800  
801  
802  
803  
804  
805  
806  
807  
808  
809  
810  
811  
812  
813  
814  
815  
816  
817  
818  
819  
820  
821  
822  
823  
824  
825  
826  
827  
828  
829  
830  
831  
832  
833  
834  
835  
836  
837  
838  
839  
840  
841  
842  
843  
844  
845  
846  
847  
848  
849  
850  
851  
852  
853  
854  
855  
856  
857  
858  
859  
860  
861  
862  
863  
864  
865  
866  
867  
868  
869  
870  
871  
872  
873  
874  
875  
876  
877  
878  
879  
880  
881  
882  
883  
884  
885  
886  
887  
888  
889  
890  
891  
892  
893  
894  
895  
896  
897  
898  
899  
900  
901  
902  
903  
904  
905  
906  
907  
908  
909  
910  
911  
912  
913  
914  
915  
916  
917  
918  
919  
920  
921  
922  
923  
924  
925  
926  
927  
928  
929  
930  
931  
932  
933  
934  
935  
936  
937  
938  
939  
940  
941  
942  
943  
944  
945  
946  
947  
948  
949  
950  
951  
952  
953  
954  
955  
956  
957  
958  
959  
960  
961  
962  
963  
964  
965  
966  
967  
968  
969  
970  
971  
972  
973  
974  
975  
976  
977  
978  
979  
980  
981  
982  
983  
984  
985  
986  
987  
988  
989  
990  
991  
992  
993  
994  
995  
996  
997  
998  
999  
1000

1  
2  
3  
4  
5  
6  
7 operationalisation. AJ and LK drafted the manuscript. All authors read and approved the final  
8 manuscript.  
9

### 10 11 **Funding Statement**

12  
13  
14 This study was funded by a grant from the National Institute for Social Care and Health  
15 Research, Welsh Government, grant number RFS-12-14. DG is a National Institute for  
16 Health Research (England) Senior Investigator.  
17  
18

### 19 20 **Competing interests**

21  
22  
23 The authors declare that they have no competing interests.  
24

### 25 26 **Ethics approval**

27  
28 Ethical approval has been granted by the Health Information Research Unit Information  
29 Governance Review Panel at the College of Medicine at Swansea University.  
30  
31

### 32 33 **Data sharing statement**

34  
35 It will be possible to access the data after the publication of the results. Researchers interested  
36 in collaborations or further information are invited to contact AJ at [a.john@swansea.ac.uk](mailto:a.john@swansea.ac.uk).  
37  
38

### 39 40 **References**

- 41  
42  
43 1. World Health Organisation. 66th World Health Assembly. Draft comprehensive  
44 mental health action plan 2013-2020. A66/10 Rev.1, WHO 16 May 2013.  
45 [http://apps.who.int/gb/e/e\\_wha66.html](http://apps.who.int/gb/e/e_wha66.html) Accessed September 2014.  
46  
47  
48 2. Linsley KR, Schapira K, Kelly TP. Open verdict v. suicide—importance to research.  
49 *Br J Psychiatry* 2001, **178**:465-468.  
50  
51  
52  
53  
54

- 1  
2  
3  
4  
5  
6  
7 3. Appleby L, Kapur N, Shaw J, *et al*. Annual Report: England, Northern Ireland,  
8 Scotland and Wales. Manchester: University of Manchester 2013.  
9 [http://www.bbmh.manchester.ac.uk/cmhr/centreforsuicideprevention/nci/reports/Ann](http://www.bbmh.manchester.ac.uk/cmhr/centreforsuicideprevention/nci/reports/AnnualReport2013_UK.pdf)  
10 [ualReport2013\\_UK.pdf](http://www.bbmh.manchester.ac.uk/cmhr/centreforsuicideprevention/nci/reports/AnnualReport2013_UK.pdf) Accessed July 2014.  
11  
12
- 13  
14 4. Andersen UA, Andersen M, Rosholm JU, *et al*. Contacts to the health care system  
15 prior to suicide: a comprehensive analysis using registers for general and psychiatric  
16 hospital admissions, contacts to general practitioners and practising specialists and  
17 drug prescriptions. *Acta Psychiatr Scand* 2000, **102**:126-34.  
18  
19
- 20 5. Qin P, Agerbo E, Mortensen PB. Suicide risk in relation to socioeconomic,  
21 demographic, psychiatric, and familial factors: a national register-based study of all  
22 suicides in Denmark, 1981–1997. *Am J Psychiatry* 2003, **160**:765-772.  
23  
24
- 25 6. Gunnell D, Löfving S, Gustafsson JE, *et al*. School performance and risk of suicide in  
26 early adulthood: follow-up of two national cohorts of Swedish schoolchildren.  
27 *Journal of affective disorders*, 2011, **131**:104-112.  
28  
29
- 30 7. Qin P, Hawton K, Mortensen PB, *et al*. Combined effects of physical illness and  
31 comorbid psychiatric disorder on risk of suicide in a national population study. *Br J*  
32 *Psychiatry* 2014, **204**:430-435.  
33  
34
- 35 8. Christiansen E, Larsen KJ, Agerbo E, *et al*. Incidence and risk factors for suicide  
36 attempts in a general population of young people: a Danish register-based study. *Aust*  
37 *N Zealand J Psychiatry* 2012, **47**: 259-270.  
38  
39
- 40 9. Björkenstam C, Johansson LA, Nordström P, *et al*. Suicide or undetermined intent? A  
41 register-based study of signs of misclassification. *Population health metrics*, 2014,  
42 **12**:11.  
43  
44  
45  
46  
47  
48  
49  
50  
51  
52  
53  
54

- 1  
2  
3  
4  
5  
6  
7  
8  
9  
10  
11  
12  
13  
14  
15  
16  
17  
18  
19  
20  
21  
22  
23  
24  
25  
26  
27  
28  
29  
30  
31  
32  
33  
34  
35  
36  
37  
38  
39  
40  
41  
42  
43  
44  
45  
46  
47  
48  
49  
50  
51  
52  
53  
54  
55  
56  
57  
58  
59  
60
10. Hjorthøj CR, Madsen T, Agerbo E, *et al.* Risk of suicide according to level of psychiatric treatment: a nationwide nested case-control study. *Social psychiatry and psychiatric epidemiology*, 2014; 1-9.
  11. Lawrence DM, Holman CD, Jablensky AV, *et al.* Suicide rates in psychiatric in-patients: an application of record linkage to mental health research. *Aust NZ J Public Health* 1999, **23**:468-470.
  12. Lawrence D, D'Arcy C, Holman J, *et al.* Increasing rates of suicide in Western Australian psychiatric patients: a record linkage study. *Acta Psychiatr Scand* 2001, **104**:443-451.
  13. Morrison KB, Laing L. *Adults' use of health services in the year before death by suicide in Alberta*. Statistics Canada; 2011.
  14. Appleby L, Kapur N, Shaw J, *et al.* Suicide in primary care in England: 2002-2011. National Confidential Inquiry into Suicide and Homicide by People with Mental Illness (NCISH). Manchester: University of Manchester 2014. <http://www.bbmh.manchester.ac.uk/cmhr/research/centreforsuicideprevention/nci/reports/SuicideinPrimaryCare2014.pdf> Accessed August 2014.
  15. ISD Scotland: The Scottish Suicide Information Database Report 2014. <http://www.isdscotland.org/Health-Topics/Public-Health/Publications/index.asp?ID=1232> Accessed August 2014.
  16. Webb RT, Kontopantelis E, Doran T, *et al.* Suicide risk in primary care patients with major physical diseases: a case-control study. *Arch Gen Psychiatry* 2012, **69**:256-264.
  17. Lyons RA, Jones KH, John G, *et al.* The SAIL databank: linking multiple health and social care datasets. *BMC Med Inform Decis Making* 2009, **9**:3.

- 1  
2  
3  
4  
5  
6  
7 18. Ford DV, Jones KH, Verplancke JP, *et al.* The SAIL Databank: building a national  
8  
9 architecture for e-health research and evaluation. *BMC Health Serv Res* 2009, **9**:1.  
10
- 11 19. World Health Organization: *The ICD-10 classification of mental and behavioural*  
12  
13 *disorders: Clinical descriptions and diagnostic guidelines*. WHO: Geneva; 1993.  
14
- 15 20. Office of National Statistics. 2011 Census Results for Wales. ONS 16<sup>th</sup> July 2012.  
16  
17 <http://wales.gov.uk/docs/statistics/2012/120716-census-2011-first-results-wales->  
18  
19 [en.pdf](http://wales.gov.uk/docs/statistics/2012/120716-census-2011-first-results-wales-en.pdf) Accessed September 2014.  
20
- 21 21. Office of National Statistics. Statistical bulletin: Suicide rates in the United Kingdom,  
22  
23 2006 to 2010. ONS 26<sup>th</sup> January 2012. [http://www.ons.gov.uk/ons/rel/subnational-](http://www.ons.gov.uk/ons/rel/subnational-health4/suicides-in-the-united-kingdom/2010/stb-statistical-bulletin.html)  
24  
25 [health4/suicides-in-the-united-kingdom/2010/stb-statistical-bulletin.html](http://www.ons.gov.uk/ons/rel/subnational-health4/suicides-in-the-united-kingdom/2010/stb-statistical-bulletin.html) Accessed  
26  
27 August 2014.  
28
- 29 22. McGregor JI, Brooks CJ, Chalasani P, *et al.* The Health Informatics Trial  
30  
31 Enhancement Project (HITE): Using routinely collected primary care data to identify  
32  
33 potential participants for a depression trial. *Trials* 2010, **11**:39.  
34  
35
- 36 23. Brooks CJ, Stephens JW, Price DE, *et al.* Use of a patient linked data warehouse to  
37  
38 facilitate diabetes trial recruitment from primary care. *Primary Care Diabetes* 2009,  
39  
40 **3**:245-248  
41  
42
- 43 24. Hill RA, Brophy S, Brunt H, *et al.* Protocol of the baseline assessment for the  
44  
45 Environments for Healthy Living (EHL) Wales cohort study. *BMC Public Health*  
46  
47 2010, **10**:150  
48  
49  
50  
51  
52  
53  
54

- 1  
2  
3  
4  
5  
6  
7  
8  
9  
10  
11  
12  
13  
14  
15  
16  
17  
18  
19  
20  
21  
22  
23  
24  
25  
26  
27  
28  
29  
30  
31  
32  
33  
34  
35  
36  
37  
38  
39  
40  
41  
42  
43  
44  
45  
46  
47  
48  
49  
50  
51  
52  
53  
54  
55  
56  
57  
58  
59  
60
25. Fone DL, Dunstan F, White J, *et al.* Cohort Profile: The Caerphilly Health and Social Needs Electronic Cohort Study (E-CATALyST). *International Journal of Epidemiology*, 2013, **42**:1620-1628.
26. Rodgers SE, Heaven M, Lacey A, *et al.* Cohort profile: the housing regeneration and health study. *Int J Epidemiol* 2012, dys200.
27. SAIL Databank: Core Data Sets. Swansea University: Swansea  
<http://www.saildatabank.com/data-dictionary/sail-datasets> Accessed September 2014.
28. Brock A, Baker A, Griffiths C, *et al.* Suicide trends and geographical variations in the United Kingdom, 1991–2004. *Health Statistics Quarterly* 2006, **31**:6-22.
29. Carroll R, Hawton K, Kapur N, *et al.* Impact of the growing use of narrative verdicts by coroners on geographic variations in suicide: analysis of coroners' inquest data. *Journal of Public Health* 2011, **10**:1-7.
30. Gunnell D, Hawton, K, Kapur N. Coroners' verdicts and suicide statistics in England and Wales. *BMJ* 2011, **343**:d6030.
31. Hill C, Cook, L. Narrative verdicts and their impact on mortality statistics in England and Wales. *Health Statistics Quarterly* 2011, **49**:81-100.
32. Gunnell D, Bennewith O, Simkin S, *et al.* Time trends in coroners' use of different verdicts for possible suicides and their impact on officially reported incidence of suicide in England: 1990-2005. *Psychol Med* 2013, **43**:1415-1422.
33. Office of National Statistics. Statistical bulletin: Suicide rates in the United Kingdom, 2011. ONS 22 January 2013. <http://www.ons.gov.uk/ons/rel/subnational-health4/suicides-in-the-united-kingdom/2011/stb-suicide-bulletin.html> Accessed August 2014.

- 1  
2  
3  
4  
5  
6  
7 34. Grimes DA, Schultz KF. Compared to what? Finding controls in a case control study.  
8 *Lancet* 2005, **365**: 1429–33.  
9
- 10  
11 35. Office for National Statistics. Welsh index of Multiple Deprivation 2011. Summary  
12 report, Welsh Government; 2011.  
13
- 14 36. Townsend P, Phillimore P, Beattie A. *Health and Deprivation: Inequality and the*  
15 *North*. Routledge: London; 1988.  
16
- 17 37. Office for National Statistics. Super Output Areas 2011.  
18 [http://www.ons.gov.uk/ons/guide-method/geography/beginner-s-guide/census/super-](http://www.ons.gov.uk/ons/guide-method/geography/beginner-s-guide/census/super-output-areas--soas-/index.html)  
19 [output-areas--soas-/index.html](http://www.ons.gov.uk/ons/guide-method/geography/beginner-s-guide/census/super-output-areas--soas-/index.html) Accessed August 2014.  
20  
21  
22
- 23 38. Bruzzi P, Green SB, Byar DP, *et al*. Estimating the population attributable risk for  
24 multiple risk factors using case-control data. *Am J Epidemiol* 1985, **122**:904-914.  
25  
26
- 27 39. Great Britain: Data Protection Act 1998. London: HMSO.  
28 <http://www.legislation.gov.uk/ukpga/1998/29/contents> Accessed August 2014.  
29  
30  
31
- 32 40. MRC: Policy and Guidance on Sharing of Research Data from Population and Patient  
33 Studies. MRC 23rd November 2011.  
34 <http://www.mrc.ac.uk/Utilities/Documentrecord/index.htm?d=MRC008302> Accessed  
35 August 2014.  
36  
37  
38
- 39 41. Wellcome Trust: Data sharing policy. Wellcome Trust August 2010.  
40 [http://www.wellcome.ac.uk/About-us/Policy/Policy-and-position-](http://www.wellcome.ac.uk/About-us/Policy/Policy-and-position-statements/WTX035043.htm)  
41 [statements/WTX035043.htm](http://www.wellcome.ac.uk/About-us/Policy/Policy-and-position-statements/WTX035043.htm) Accessed August 2014.  
42  
43  
44  
45  
46
- 47 42. Thiru K, Hassey A, Sullivan F. Systematic review of scope and quality of electronic  
48 patient record data in primary care. *BMJ* 2003, **326**:1070.  
49  
50  
51  
52  
53  
54

- 1  
2  
3  
4  
5  
6  
7 43. University of Bristol, Suicide Research Centre.  
8 <http://www.bristol.ac.uk/psychiatry/research/suicideresearch.html> Accessed August  
9 2014.  
10  
11  
12  
13 44. The University of Manchester Centre for Suicide Prevention.  
14 <http://www.bbmh.manchester.ac.uk/cmhr/research/centreforsuicideprevention/>  
15 Accessed August 2014.  
16  
17  
18  
19 45. University of Oxford, Centre for Suicide Research. <http://cebmh.warne.ox.ac.uk/csr/>  
20 Accessed August 2014.  
21  
22  
23  
24 46. ISD Scotland. Scottish Suicide Information Database (ScotSID). ISD Scotland 2011.  
25 <http://data.gov.uk/dataset/scottish-suicide-information-database> Accessed August  
26 2014.  
27  
28  
29  
30  
31  
32  
33  
34  
35  
36  
37  
38  
39  
40  
41  
42  
43  
44  
45  
46  
47  
48  
49  
50  
51  
52  
53  
54  
55  
56  
57  
58  
59  
60

STROBE Statement—checklist of items that should be included in reports of observational studies—  
protocol limits some of these

|                              | Item No | Recommendation                                                                                                                                                                                                                                                                                                                                                                                                                                                         | Line                       |
|------------------------------|---------|------------------------------------------------------------------------------------------------------------------------------------------------------------------------------------------------------------------------------------------------------------------------------------------------------------------------------------------------------------------------------------------------------------------------------------------------------------------------|----------------------------|
| <b>Title and abstract</b>    | 1       | (a) Indicate the study's design with a commonly used term in the title or the abstract                                                                                                                                                                                                                                                                                                                                                                                 | 33                         |
|                              |         | (b) Provide in the abstract an informative and balanced summary of what was done and what was found                                                                                                                                                                                                                                                                                                                                                                    | 34-41                      |
| <b>Introduction</b>          |         |                                                                                                                                                                                                                                                                                                                                                                                                                                                                        |                            |
| Background/rationale         | 2       | Explain the scientific background and rationale for the investigation being reported                                                                                                                                                                                                                                                                                                                                                                                   | 73-131                     |
| Objectives                   | 3       | State specific objectives, including any prespecified hypotheses                                                                                                                                                                                                                                                                                                                                                                                                       | 136-150                    |
| <b>Methods</b>               |         |                                                                                                                                                                                                                                                                                                                                                                                                                                                                        |                            |
| Study design                 | 4       | Present key elements of study design early in the paper                                                                                                                                                                                                                                                                                                                                                                                                                | 152-7                      |
| Setting                      | 5       | Describe the setting, locations, and relevant dates, including periods of recruitment, exposure, follow-up, and data collection                                                                                                                                                                                                                                                                                                                                        | 158-300                    |
| Participants                 | 6       | (a) <i>Cohort study</i> —Give the eligibility criteria, and the sources and methods of selection of participants. Describe methods of follow-up<br><i>Case-control study</i> —Give the eligibility criteria, and the sources and methods of case ascertainment and control selection. Give the rationale for the choice of cases and controls<br><i>Cross-sectional study</i> —Give the eligibility criteria, and the sources and methods of selection of participants | 209-282                    |
|                              |         | (b) <i>Cohort study</i> —For matched studies, give matching criteria and number of exposed and unexposed<br><i>Case-control study</i> —For matched studies, give matching criteria and the number of controls per case                                                                                                                                                                                                                                                 | 237-282                    |
| Variables                    | 7       | Clearly define all outcomes, exposures, predictors, potential confounders, and effect modifiers. Give diagnostic criteria, if applicable                                                                                                                                                                                                                                                                                                                               | Table 3 , table 4, 283-349 |
| Data sources/<br>measurement | 8*      | For each variable of interest, give sources of data and details of methods of assessment (measurement). Describe comparability of assessment methods if there is more than one group                                                                                                                                                                                                                                                                                   | Table 3 , table 4, 283-349 |
| Bias                         | 9       | Describe any efforts to address potential sources of bias                                                                                                                                                                                                                                                                                                                                                                                                              | 350-360                    |
| Study size                   | 10      | Explain how the study size was arrived at                                                                                                                                                                                                                                                                                                                                                                                                                              | 245-282, table 2           |
| Quantitative variables       | 11      | Explain how quantitative variables were handled in the analyses. If applicable, describe which groupings were chosen and why                                                                                                                                                                                                                                                                                                                                           | 314-<br>359:protocol       |
| Statistical methods          | 12      | (a) Describe all statistical methods, including those used to control for confounding                                                                                                                                                                                                                                                                                                                                                                                  | 314-<br>359:protocol       |
|                              |         | (b) Describe any methods used to examine subgroups and interactions                                                                                                                                                                                                                                                                                                                                                                                                    | 314-<br>359:protocol       |
|                              |         | (c) Explain how missing data were addressed                                                                                                                                                                                                                                                                                                                                                                                                                            | 314-<br>359:protocol       |
|                              |         | (d) <i>Cohort study</i> —If applicable, explain how loss to follow-up was addressed                                                                                                                                                                                                                                                                                                                                                                                    | 236-282                    |

1  
2 *Case-control study*—If applicable, explain how matching of cases  
3 and controls was addressed

4 *Cross-sectional study*—If applicable, describe analytical methods  
5 taking account of sampling strategy  
6

---

7 (e) Describe any sensitivity analyses

8 Continued on next page  
9  
10  
11  
12  
13  
14  
15  
16  
17  
18  
19  
20  
21  
22  
23  
24  
25  
26  
27  
28  
29  
30  
31  
32  
33  
34  
35  
36  
37  
38  
39  
40  
41  
42  
43  
44  
45  
46  
47  
48  
49  
50  
51  
52  
53  
54  
55  
56  
57  
58  
59  
60

For peer review only

| <b>Results</b>           |     |                                                                                                                                                                                                              |                   |
|--------------------------|-----|--------------------------------------------------------------------------------------------------------------------------------------------------------------------------------------------------------------|-------------------|
| Participants             | 13* | (a) Report numbers of individuals at each stage of study—eg numbers potentially eligible, examined for eligibility, confirmed eligible, included in the study, completing follow-up, and analysed            | Table 2, protocol |
|                          |     | (b) Give reasons for non-participation at each stage                                                                                                                                                         | Will              |
|                          |     | (c) Consider use of a flow diagram                                                                                                                                                                           | Will              |
| Descriptive data         | 14* | (a) Give characteristics of study participants (eg demographic, clinical, social) and information on exposures and potential confounders                                                                     | Will              |
|                          |     | (b) Indicate number of participants with missing data for each variable of interest                                                                                                                          | Will              |
|                          |     | (c) <i>Cohort study</i> —Summarise follow-up time (eg, average and total amount)                                                                                                                             |                   |
| Outcome data             | 15* | <i>Cohort study</i> —Report numbers of outcome events or summary measures over time                                                                                                                          |                   |
|                          |     | <i>Case-control study</i> —Report numbers in each exposure category, or summary measures of exposure                                                                                                         | Will              |
|                          |     | <i>Cross-sectional study</i> —Report numbers of outcome events or summary measures                                                                                                                           |                   |
| Main results             | 16  | (a) Give unadjusted estimates and, if applicable, confounder-adjusted estimates and their precision (eg, 95% confidence interval). Make clear which confounders were adjusted for and why they were included | Will              |
|                          |     | (b) Report category boundaries when continuous variables were categorized                                                                                                                                    | Will              |
|                          |     | (c) If relevant, consider translating estimates of relative risk into absolute risk for a meaningful time period                                                                                             |                   |
| Other analyses           | 17  | Report other analyses done—eg analyses of subgroups and interactions, and sensitivity analyses                                                                                                               | Will              |
| <b>Discussion</b>        |     |                                                                                                                                                                                                              |                   |
| Key results              | 18  | Summarise key results with reference to study objectives                                                                                                                                                     | Will              |
| Limitations              | 19  | Discuss limitations of the study, taking into account sources of potential bias or imprecision. Discuss both direction and magnitude of any potential bias                                                   | Will              |
| Interpretation           | 20  | Give a cautious overall interpretation of results considering objectives, limitations, multiplicity of analyses, results from similar studies, and other relevant evidence                                   | Will              |
| Generalisability         | 21  | Discuss the generalisability (external validity) of the study results                                                                                                                                        | Will              |
| <b>Other information</b> |     |                                                                                                                                                                                                              |                   |
| Funding                  | 22  | Give the source of funding and the role of the funders for the present study and, if applicable, for the original study on which the present article is based                                                | 447               |

\*Give information separately for cases and controls in case-control studies and, if applicable, for exposed and unexposed groups in cohort and cross-sectional studies.

**Note:** An Explanation and Elaboration article discusses each checklist item and gives methodological background and published examples of transparent reporting. The STROBE checklist is best used in conjunction with this article (freely available on the Web sites of PLoS Medicine at <http://www.plosmedicine.org/>, Annals of Internal Medicine at <http://www.annals.org/>, and Epidemiology at <http://www.epidem.com/>). Information on the STROBE Initiative is available at [www.strobe-statement.org](http://www.strobe-statement.org).
