# Supplementary material for: Suicide Information Database-Cymru: a protocol for a population-based, routinely collected data linkage study to explore risks and patterns of healthcare contact prior to suicide to identify opportunities for intervention
Source: PubMed Central journal article supplement — BMJ Open. 2014 Nov 25;4(11):e006780. doi: 10.1136/bmjopen-2014-006780 (PMC4248097; doi:10.1136/bmjopen-2014-006780), 2014-11-25
Supplement: bmjopen-2014-006780.reviewer_comments.pdf [file bmjopen-2014-006780.reviewer_comments.pdf]

## PEER REVIEW HISTORY

BMJ Open publishes all reviews undertaken for accepted manuscripts. Reviewers are asked to complete a checklist review form (<http://bmjopen.bmj.com/site/about/resources/checklist.pdf>) and are provided with free text boxes to elaborate on their assessment. These free text comments are reproduced below.

## ARTICLE DETAILS

|                            |                                                                                                                                                                                                                          |
|----------------------------|--------------------------------------------------------------------------------------------------------------------------------------------------------------------------------------------------------------------------|
| <b>TITLE (PROVISIONAL)</b> | Suicide Information Database: A protocol for a population-based, routinely collected data linkage study to explore risks and patterns of healthcare contact prior to suicide to identify opportunities for intervention. |
| <b>AUTHORS</b>             | John, Ann; Dennis, Mick; Kosnes, Liv; Gunnell, David; Scourfield, Jonathan; Ford, David; Lloyd, Keith                                                                                                                    |

This article was not externally reviewed at BMJ Open. Protocols that have been independently assessed prior to submission to BMJ Open are usually fast-tracked to publication on the grounds that further substantial changes will not be possible. This independent assessment will usually be external, independent review for both a substantial grant award from a non-commercial or government funder and ethics approval.
